# Supplementary material for: Decentralizing cancer care in sub-Saharan Africa through an integrated regional cancer centre model: The case of Kenya
Source: PLOS Glob Public Health. 2023 Sep 22;3(9):e0002402. doi: 10.1371/journal.pgph.0002402 (PMC10516416; doi:10.1371/journal.pgph.0002402)
Supplement: S1 Data — (PDF) [file pgph.0002402.s001.pdf]

**Facility**

Nyeri Cancer Centre  
Meru Cancer Centre  
Taita Taveta Cancer Centre  
Kakamega Cancer Centre  
Garissa Cancer Centre  
Embu Cancer Centre  
Makueni Cancer Centre  
Kisumu Cancer Centre  
Mombasa Cancer Centre  
Mombasa Cancer Centre  
Garissa Cancer Centre  
Nakuru Cancer Centre  
Taita Taveta Cancer Centre  
Embu Cancer Centre  
Embu Cancer Centre  
Bomet Cancer Centre  
Machakos Cancer Centre  
Nyeri Cancer Centre  
Kenyatta National Hospital  
Kenyatta National Hospital  
Nyeri Cancer Centre  
Machakos Cancer Centre  
Kisumu Cancer Centre  
Meru Cancer Centre  
Meru Cancer Centre  
Kisumu Cancer Centre  
Machakos Cancer Centre  
Taita Taveta Cancer Centre  
Nakuru Cancer Centre  
Embu Cancer Centre  
Garissa Cancer Centre  
Meru Cancer Centre  
Bomet Cancer Centre  
Kenyatta University Teaching Referral and Research Hospital  
Kenyatta University Teaching Referral and Research Hospital  
Mombasa Cancer Centre  
Mombasa Cancer Centre  
Makueni Cancer Centre  
Embu Cancer Centre  
Garissa Cancer Centre  
Taita Taveta Cancer Centre  
Taita Taveta Cancer Centre  
Nyeri Cancer Centre  
Kenyatta University Teaching Referral and Research Hospital  
Nyeri Cancer Centre  
Kenyatta University Teaching Referral and Research Hospital  
Taita Taveta Cancer Centre  
Taita Taveta Cancer Centre  
Meru Cancer Centre

Meru Cancer Centre  
Makueni Cancer Centre  
Bomet Cancer Centre  
Mombasa Cancer Centre  
Garissa Cancer Centre  
Mombasa Cancer Centre  
Embu Cancer Centre  
Kakamega Cancer Centre  
Kakamega Cancer Centre  
Kisumu Cancer Centre  
Kisumu Cancer Centre  
Kenyatta National Hospital  
Kenyatta National Hospital  
Taita Taveta Cancer Centre  
Taita Taveta Cancer Centre  
Garissa Cancer Centre  
Garissa Cancer Centre  
Nyeri Cancer Centre  
Nyeri Cancer Centre  
Makueni Cancer Centre  
Nyeri Cancer Centre  
Nyeri Cancer Centre  
Garissa Cancer Centre  
Taita Taveta Cancer Centre  
Nakuru Cancer Centre  
Nakuru Cancer Centre  
Embu Cancer Centre  
Bomet Cancer Centre  
Meru Cancer Centre  
Meru Cancer Centre  
Kisumu Cancer Centre  
Kisumu Cancer Centre  
Taita Taveta Cancer Centre  
Embu Cancer Centre  
Kenyatta University Teaching Referral and Research Hospital  
Kenyatta University Teaching Referral and Research Hospital  
Makueni Cancer Centre  
Garissa Cancer Centre  
Bomet Cancer Centre  
Kakamega Cancer Centre  
Taita Taveta Cancer Centre  
Nyeri Cancer Centre  
Kisumu Cancer Centre  
Nakuru Cancer Centre  
Nakuru Cancer Centre  
Makueni Cancer Centre  
Bomet Cancer Centre  
Kisumu Cancer Centre  
Machakos Cancer Centre  
Kisumu Cancer Centre

Machakos Cancer Centre  
Garissa Cancer Centre  
Taita Taveta Cancer Centre  
Embu Cancer Centre  
Taita Taveta Cancer Centre  
Garissa Cancer Centre  
Makueni Cancer Centre  
Kisumu Cancer Centre  
Machakos Cancer Centre  
Machakos Cancer Centre  
Nakuru Cancer Centre  
Nyeri Cancer Centre  
Embu Cancer Centre  
Nyeri Cancer Centre  
Nyeri Cancer Centre  
Garissa Cancer Centre  
Nakuru Cancer Centre  
Bomet Cancer Centre  
Kisumu Cancer Centre  
Nakuru Cancer Centre  
Bomet Cancer Centre  
Mombasa Cancer Centre  
Mombasa Cancer Centre  
Embu Cancer Centre  
Nakuru Cancer Centre  
Taita Taveta Cancer Centre  
Meru Cancer Centre  
Kenyatta University Teaching Referral and Research Hospital  
Meru Cancer Centre  
Kenyatta University Teaching Referral and Research Hospital  
Kenyatta University Teaching Referral and Research Hospital  
Meru Cancer Centre  
Embu Cancer Centre  
Taita Taveta Cancer Centre  
Meru Cancer Centre  
Kenyatta National Hospital  
Kenyatta National Hospital  
Nakuru Cancer Centre  
Garissa Cancer Centre  
Bomet Cancer Centre  
Meru Cancer Centre  
Meru Cancer Centre  
Kenyatta University Teaching Referral and Research Hospital  
Kenyatta University Teaching Referral and Research Hospital  
Bomet Cancer Centre  
Nakuru Cancer Centre  
Embu Cancer Centre  
Taita Taveta Cancer Centre  
Garissa Cancer Centre  
Mombasa Cancer Centre

Mombasa Cancer Centre  
Garissa Cancer Centre  
Bomet Cancer Centre  
Garissa Cancer Centre  
Kenyatta University Teaching Refferal and Research Hospital  
Kenyatta University Teaching Refferal and Research Hospital  
Meru Cancer Centre  
Meru Cancer Centre  
Taita Taveta Cancer Centre  
Nakuru Cancer Centre  
Kenyatta University Teaching Refferal and Research Hospital  
Kenyatta University Teaching Refferal and Research Hospital  
Taita Taveta Cancer Centre  
Meru Cancer Centre  
Bomet Cancer Centre  
Meru Cancer Centre  
Nakuru Cancer Centre  
Mombasa Cancer Centre  
Mombasa Cancer Centre  
Garissa Cancer Centre  
Taita Taveta Cancer Centre  
Meru Cancer Centre  
Kenyatta National Hospital  
Embu Cancer Centre  
Kenyatta National Hospital  
Kenyatta University Teaching Refferal and Research Hospital  
Kenyatta University Teaching Refferal and Research Hospital  
Mombasa Cancer Centre  
Mombasa Cancer Centre  
Embu Cancer Centre  
Garissa Cancer Centre  
Garissa Cancer Centre  
Nakuru Cancer Centre  
Kenyatta University Teaching Refferal and Research Hospital  
Kenyatta University Teaching Refferal and Research Hospital  
Bomet Cancer Centre  
Kenyatta University Teaching Refferal and Research Hospital  
Meru Cancer Centre  
Meru Cancer Centre  
Bomet Cancer Centre  
Kenyatta University Teaching Refferal and Research Hospital  
Nakuru Cancer Centre  
Embu Cancer Centre  
Taita Taveta Cancer Centre  
Nakuru Cancer Centre  
Kenyatta University Teaching Refferal and Research Hospital  
Taita Taveta Cancer Centre  
Embu Cancer Centre  
Bomet Cancer Centre  
Nakuru Cancer Centre

Kenyatta University Teaching Referral and Research Hospital  
Meru Cancer Centre  
Kenyatta University Teaching Referral and Research Hospital  
Bomet Cancer Centre  
Garissa Cancer Centre  
Taita Taveta Cancer Centre  
Embu Cancer Centre  
Kenyatta University Teaching Referral and Research Hospital  
Kenyatta University Teaching Referral and Research Hospital  
Garissa Cancer Centre  
Garissa Cancer Centre  
Bomet Cancer Centre  
Meru Cancer Centre  
Embu Cancer Centre  
Meru Cancer Centre  
Nakuru Cancer Centre  
Taita Taveta Cancer Centre  
Kenyatta University Teaching Referral and Research Hospital  
Taita Taveta Cancer Centre  
Embu Cancer Centre  
Bomet Cancer Centre  
Nakuru Cancer Centre  
Garissa Cancer Centre  
Garissa Cancer Centre  
Kenyatta University Teaching Referral and Research Hospital  
Meru Cancer Centre  
Nyeri Cancer Centre  
Kakamega Cancer Centre  
Kakamega Cancer Centre  
Garissa Cancer Centre  
Meru Cancer Centre  
Embu Cancer Centre  
Makueni Cancer Centre  
Kisumu Cancer Centre  
Kisumu Cancer Centre  
Mombasa Cancer Centre  
Mombasa Cancer Centre  
Kenyatta University Teaching Referral and Research Hospital  
Embu Cancer Centre  
Kakamega Cancer Centre  
Garissa Cancer Centre  
Kakamega Cancer Centre  
Kisumu Cancer Centre  
Nyeri Cancer Centre  
Kenyatta National Hospital  
Kenyatta National Hospital  
Meru Cancer Centre  
Meru Cancer Centre  
Kenyatta University Teaching Referral and Research Hospital  
Kenyatta University Teaching Referral and Research Hospital

Kakamega Cancer Centre  
Kenyatta National Hospital  
Nyeri Cancer Centre  
Embu Cancer Centre  
Kisumu Cancer Centre  
Kisumu Cancer Centre  
Meru Cancer Centre  
Meru Cancer Centre  
Kisumu Cancer Centre  
Kenyatta University Teaching Referral and Research Hospital  
Kenyatta University Teaching Referral and Research Hospital  
Mombasa Cancer Centre  
Mombasa Cancer Centre  
Makueni Cancer Centre  
Garissa Cancer Centre  
Nyeri Cancer Centre  
Nyeri Cancer Centre  
Meru Cancer Centre  
Kenyatta University Teaching Referral and Research Hospital  
Kenyatta University Teaching Referral and Research Hospital  
Meru Cancer Centre  
Makueni Cancer Centre  
Mombasa Cancer Centre  
Mombasa Cancer Centre  
Garissa Cancer Centre  
Kakamega Cancer Centre  
Kisumu Cancer Centre  
Kisumu Cancer Centre  
Kenyatta National Hospital  
Kisumu Cancer Centre  
Kenyatta National Hospital  
Garissa Cancer Centre  
Makueni Cancer Centre  
Nyeri Cancer Centre  
Kakamega Cancer Centre  
Kakamega Cancer Centre  
Meru Cancer Centre  
Kakamega Cancer Centre  
Makueni Cancer Centre  
Kakamega Cancer Centre  
Meru Cancer Centre  
Garissa Cancer Centre  
Kisumu Cancer Centre  
Nyeri Cancer Centre  
Nakuru Cancer Centre  
Nakuru Cancer Centre  
Kisumu Cancer Centre  
Kisumu Cancer Centre  
Nyeri Cancer Centre  
Garissa Cancer Centre

Kakamega Cancer Centre  
Kenyatta University Teaching Refferal and Research Hospital  
Kakamega Cancer Centre  
Kenyatta University Teaching Refferal and Research Hospital  
Makueni Cancer Centre  
Meru Cancer Centre  
Meru Cancer Centre  
Embu Cancer Centre  
Garissa Cancer Centre  
Kakamega Cancer Centre  
Kisumu Cancer Centre  
Makueni Cancer Centre  
Nyeri Cancer Centre  
Nakuru Cancer Centre  
Nakuru Cancer Centre  
Kisumu Cancer Centre  
Kisumu Cancer Centre  
Kakamega Cancer Centre  
Meru Cancer Centre  
Garissa Cancer Centre  
Kenyatta University Teaching Refferal and Research Hospital  
Kisumu Cancer Centre  
Kisumu Cancer Centre  
Garissa Cancer Centre  
Makueni Cancer Centre  
Meru Cancer Centre  
Meru Cancer Centre  
Nakuru Cancer Centre  
Embu Cancer Centre  
Nyeri Cancer Centre  
Nyeri Cancer Centre  
Makueni Cancer Centre  
Kenyatta University Teaching Refferal and Research Hospital  
Kenyatta University Teaching Refferal and Research Hospital  
Kakamega Cancer Centre  
Nakuru Cancer Centre  
Nakuru Cancer Centre  
Garissa Cancer Centre  
Kisumu Cancer Centre  
Meru Cancer Centre  
Nyeri Cancer Centre  
Kakamega Cancer Centre  
Garissa Cancer Centre  
Garissa Cancer Centre  
Makueni Cancer Centre  
Mombasa Cancer Centre  
Mombasa Cancer Centre  
Kisumu Cancer Centre  
Embu Cancer Centre  
Embu Cancer Centre

Kakamega Cancer Centre  
Makueni Cancer Centre  
Kenyatta National Hospital  
Kenyatta National Hospital  
Machakos Cancer Centre  
Nyeri Cancer Centre  
Machakos Cancer Centre  
Meru Cancer Centre  
Meru Cancer Centre  
Kisumu Cancer Centre  
Kakamega Cancer Centre  
Machakos Cancer Centre  
Machakos Cancer Centre  
Kisumu Cancer Centre  
Garissa Cancer Centre  
Embu Cancer Centre  
Embu Cancer Centre  
Garissa Cancer Centre  
Meru Cancer Centre  
Kenyatta University Teaching Referral and Research Hospital  
Kenyatta University Teaching Referral and Research Hospital  
Mombasa Cancer Centre  
Mombasa Cancer Centre  
Embu Cancer Centre  
Garissa Cancer Centre  
Nyeri Cancer Centre  
Machakos Cancer Centre  
Kenyatta University Teaching Referral and Research Hospital  
Kenyatta University Teaching Referral and Research Hospital  
Nyeri Cancer Centre  
Machakos Cancer Centre  
Meru Cancer Centre  
Meru Cancer Centre  
Garissa Cancer Centre  
Mombasa Cancer Centre  
Mombasa Cancer Centre  
Garissa Cancer Centre  
Kakamega Cancer Centre  
Kakamega Cancer Centre  
Embu Cancer Centre  
Kisumu Cancer Centre  
Kisumu Cancer Centre  
Kenyatta National Hospital  
Kisumu Cancer Centre  
Machakos Cancer Centre  
Machakos Cancer Centre  
Kenyatta National Hospital  
Garissa Cancer Centre  
Makueni Cancer Centre  
Nyeri Cancer Centre

Meru Cancer Centre  
Kisumu Cancer Centre  
Makueni Cancer Centre  
Nyeri Cancer Centre  
Garissa Cancer Centre  
Garissa Cancer Centre  
Nakuru Cancer Centre  
Nakuru Cancer Centre  
Machakos Cancer Centre  
Kisumu Cancer Centre  
Kisumu Cancer Centre  
Nyeri Cancer Centre  
Meru Cancer Centre  
Nakuru Cancer Centre  
Embu Cancer Centre  
Kenyatta University Teaching Referral and Research Hospital  
Makueni Cancer Centre  
Kenyatta University Teaching Referral and Research Hospital  
Makueni Cancer Centre  
Garissa Cancer Centre  
Garissa Cancer Centre  
Nyeri Cancer Centre  
Meru Cancer Centre  
Makueni Cancer Centre  
Embu Cancer Centre  
Embu Cancer Centre  
Nakuru Cancer Centre  
Nakuru Cancer Centre  
Kisumu Cancer Centre  
Kisumu Cancer Centre  
Machakos Cancer Centre  
Machakos Cancer Centre  
Kakamega Cancer Centre  
Garissa Cancer Centre  
Garissa Cancer Centre  
Kisumu Cancer Centre  
Garissa Cancer Centre  
Garissa Cancer Centre  
Kakamega Cancer Centre  
Makueni Cancer Centre  
Machakos Cancer Centre  
Machakos Cancer Centre  
Embu Cancer Centre  
Nyeri Cancer Centre  
Embu Cancer Centre  
Machakos Cancer Centre  
Machakos Cancer Centre  
Makueni Cancer Centre  
Nyeri Cancer Centre  
Kakamega Cancer Centre

Garissa Cancer Centre  
Garissa Cancer Centre  
Nakuru Cancer Centre  
Nakuru Cancer Centre  
Embu Cancer Centre  
Embu Cancer Centre  
Mombasa Cancer Centre  
Taita Taveta Cancer Centre  
Taita Taveta Cancer Centre  
Garissa Cancer Centre  
Meru Cancer Centre  
Mombasa Cancer Centre  
Garissa Cancer Centre  
Garissa Cancer Centre  
Embu Cancer Centre  
Embu Cancer Centre  
Taita Taveta Cancer Centre  
Taita Taveta Cancer Centre  
Kenyatta National Hospital  
Kenyatta National Hospital  
Nyeri Cancer Centre  
Nyeri Cancer Centre  
Meru Cancer Centre  
Kisumu Cancer Centre  
Meru Cancer Centre  
Kisumu Cancer Centre  
Bomet Cancer Centre  
Taita Taveta Cancer Centre  
Garissa Cancer Centre  
Garissa Cancer Centre  
Mombasa Cancer Centre  
Mombasa Cancer Centre  
Bomet Cancer Centre  
Garissa Cancer Centre  
Kenyatta University Teaching Referral and Research Hospital  
Kenyatta University Teaching Referral and Research Hospital  
Meru Cancer Centre  
Taita Taveta Cancer Centre  
Taita Taveta Cancer Centre  
Machakos Cancer Centre  
Garissa Cancer Centre  
Machakos Cancer Centre  
Meru Cancer Centre  
Taita Taveta Cancer Centre  
Bomet Cancer Centre  
Kenyatta University Teaching Referral and Research Hospital  
Kenyatta University Teaching Referral and Research Hospital  
Bomet Cancer Centre  
Meru Cancer Centre  
Mombasa Cancer Centre

Mombasa Cancer Centre  
Kisumu Cancer Centre  
Garissa Cancer Centre  
Garissa Cancer Centre  
Taita Taveta Cancer Centre  
Bomet Cancer Centre  
Kenyatta National Hospital  
Kenyatta National Hospital  
Nyeri Cancer Centre  
Nyeri Cancer Centre  
Makueni Cancer Centre  
Makueni Cancer Centre  
Nyeri Cancer Centre  
Nyeri Cancer Centre  
Garissa Cancer Centre  
Garissa Cancer Centre  
Nakuru Cancer Centre  
Nakuru Cancer Centre  
Taita Taveta Cancer Centre  
Taita Taveta Cancer Centre  
Bomet Cancer Centre  
Bomet Cancer Centre  
Garissa Cancer Centre  
Bomet Cancer Centre  
Kenyatta University Teaching Referral and Research Hospital  
Bomet Cancer Centre  
Meru Cancer Centre  
Kenyatta University Teaching Referral and Research Hospital  
Taita Taveta Cancer Centre  
Garissa Cancer Centre  
Kisumu Cancer Centre  
Kisumu Cancer Centre  
Garissa Cancer Centre  
Taita Taveta Cancer Centre  
Taita Taveta Cancer Centre  
Bomet Cancer Centre  
Kisumu Cancer Centre  
Garissa Cancer Centre  
Nakuru Cancer Centre  
Nakuru Cancer Centre  
Garissa Cancer Centre  
Garissa Cancer Centre  
Kisumu Cancer Centre  
Machakos Cancer Centre  
Machakos Cancer Centre  
Kisumu Cancer Centre  
Garissa Cancer Centre  
Taita Taveta Cancer Centre  
Machakos Cancer Centre  
Makueni Cancer Centre

Makueni Cancer Centre  
Machakos Cancer Centre  
Taita Taveta Cancer Centre  
Nakuru Cancer Centre  
Nakuru Cancer Centre  
Garissa Cancer Centre  
Bomet Cancer Centre  
Bomet Cancer Centre  
Makueni Cancer Centre  
Mombasa Cancer Centre  
Mombasa Cancer Centre  
Embu Cancer Centre  
Makueni Cancer Centre  
Embu Cancer Centre  
Bomet Cancer Centre  
Kenyatta National Hospital  
Kenyatta National Hospital  
Nyeri Cancer Centre  
Nyeri Cancer Centre  
Meru Cancer Centre  
Meru Cancer Centre  
Kisumu Cancer Centre  
Kisumu Cancer Centre  
Makueni Cancer Centre  
Taita Taveta Cancer Centre  
Garissa Cancer Centre  
Garissa Cancer Centre  
Bomet Cancer Centre  
Kenyatta University Teaching Referral and Research Hospital  
Kenyatta University Teaching Referral and Research Hospital  
Mombasa Cancer Centre  
Mombasa Cancer Centre  
Garissa Cancer Centre  
Taita Taveta Cancer Centre  
Bomet Cancer Centre  
Bomet Cancer Centre  
Kenyatta University Teaching Referral and Research Hospital  
Kenyatta University Teaching Referral and Research Hospital  
Machakos Cancer Centre  
Meru Cancer Centre  
Meru Cancer Centre  
Mombasa Cancer Centre  
Mombasa Cancer Centre  
Kenyatta National Hospital  
Bomet Cancer Centre  
Kenyatta National Hospital  
Taita Taveta Cancer Centre  
Taita Taveta Cancer Centre  
Nyeri Cancer Centre  
Nyeri Cancer Centre

Nyeri Cancer Centre  
Nyeri Cancer Centre  
Garissa Cancer Centre  
Nakuru Cancer Centre  
Nakuru Cancer Centre  
Taita Taveta Cancer Centre  
Bomet Cancer Centre  
Kisumu Cancer Centre  
Kenyatta University Teaching Referral and Research Hospital  
Kisumu Cancer Centre  
Garissa Cancer Centre  
Meru Cancer Centre  
Bomet Cancer Centre  
Taita Taveta Cancer Centre  
Makueni Cancer Centre  
Kenyatta University Teaching Referral and Research Hospital  
Machakos Cancer Centre  
Makueni Cancer Centre  
Nakuru Cancer Centre  
Nakuru Cancer Centre  
Machakos Cancer Centre  
Machakos Cancer Centre  
Garissa Cancer Centre  
Taita Taveta Cancer Centre  
Kisumu Cancer Centre  
Kisumu Cancer Centre  
Taita Taveta Cancer Centre  
Makueni Cancer Centre  
Makueni Cancer Centre  
Machakos Cancer Centre  
Machakos Cancer Centre  
Kisumu Cancer Centre  
Makueni Cancer Centre  
Makueni Cancer Centre  
Garissa Cancer Centre  
Taita Taveta Cancer Centre  
Nakuru Cancer Centre  
Nakuru Cancer Centre  
Kisumu Cancer Centre  
Taita Taveta Cancer Centre  
Meru Cancer Centre  
Mombasa Cancer Centre  
Mombasa Cancer Centre  
Embu Cancer Centre  
Embu Cancer Centre  
Garissa Cancer Centre  
Kenyatta National Hospital  
Kenyatta National Hospital  
Bomet Cancer Centre  
Nyeri Cancer Centre

Nyeri Cancer Centre  
Meru Cancer Centre  
Kisumu Cancer Centre  
Kisumu Cancer Centre  
Meru Cancer Centre  
Garissa Cancer Centre  
Mombasa Cancer Centre  
Bomet Cancer Centre  
Kenyatta University Teaching Referral and Research Hospital  
Kenyatta University Teaching Referral and Research Hospital  
Mombasa Cancer Centre  
Meru Cancer Centre  
Machakos Cancer Centre  
Machakos Cancer Centre  
Bomet Cancer Centre  
Meru Cancer Centre  
Bomet Cancer Centre  
Taita Taveta Cancer Centre  
Kenyatta University Teaching Referral and Research Hospital  
Kenyatta University Teaching Referral and Research Hospital  
Meru Cancer Centre  
Mombasa Cancer Centre  
Mombasa Cancer Centre  
Garissa Cancer Centre  
Kenyatta National Hospital  
Bomet Cancer Centre  
Kenyatta National Hospital  
Taita Taveta Cancer Centre  
Nyeri Cancer Centre  
Nyeri Cancer Centre  
Nyeri Cancer Centre  
Nyeri Cancer Centre  
Garissa Cancer Centre  
Nakuru Cancer Centre  
Nakuru Cancer Centre  
Taita Taveta Cancer Centre  
Bomet Cancer Centre  
Kisumu Cancer Centre  
Kisumu Cancer Centre  
Kenyatta University Teaching Referral and Research Hospital  
Kenyatta University Teaching Referral and Research Hospital  
Taita Taveta Cancer Centre  
Garissa Cancer Centre  
Taita Taveta Cancer Centre  
Nakuru Cancer Centre  
Nakuru Cancer Centre  
Kisumu Cancer Centre  
Kisumu Cancer Centre  
Machakos Cancer Centre  
Machakos Cancer Centre

Garissa Cancer Centre  
Bomet Cancer Centre  
Taita Taveta Cancer Centre  
Embu Cancer Centre  
Machakos Cancer Centre  
Machakos Cancer Centre  
Nakuru Cancer Centre  
Garissa Cancer Centre  
Nakuru Cancer Centre  
Bomet Cancer Centre  
Makueni Cancer Centre  
Mombasa Cancer Centre  
Mombasa Cancer Centre  
Kisumu Cancer Centre  
Embu Cancer Centre  
Makueni Cancer Centre  
Embu Cancer Centre  
Kenyatta National Hospital  
Kenyatta National Hospital  
Nyeri Cancer Centre  
Nyeri Cancer Centre  
Kisumu Cancer Centre  
Meru Cancer Centre  
Kisumu Cancer Centre  
Meru Cancer Centre  
Bomet Cancer Centre  
Bomet Cancer Centre  
Kenyatta University Teaching Referral and Research Hospital  
Kenyatta University Teaching Referral and Research Hospital  
Mombasa Cancer Centre  
Mombasa Cancer Centre  
Kakamega Cancer Centre  
Makueni Cancer Centre  
Kenyatta University Teaching Referral and Research Hospital  
Kenyatta University Teaching Referral and Research Hospital  
Bomet Cancer Centre  
Meru Cancer Centre  
Bomet Cancer Centre  
Nyeri Cancer Centre  
Meru Cancer Centre  
Mombasa Cancer Centre  
Mombasa Cancer Centre  
Bomet Cancer Centre  
Kenyatta National Hospital  
Kenyatta National Hospital  
Garissa Cancer Centre  
Nyeri Cancer Centre  
Nyeri Cancer Centre  
Kakamega Cancer Centre  
Nyeri Cancer Centre

Nyeri Cancer Centre  
Garissa Cancer Centre  
Nakuru Cancer Centre  
Nakuru Cancer Centre  
Taita Taveta Cancer Centre  
Bomet Cancer Centre  
Bomet Cancer Centre  
Kisumu Cancer Centre  
Kisumu Cancer Centre  
Nyeri Cancer Centre  
Kenyatta University Teaching Referral and Research Hospital  
Kenyatta University Teaching Referral and Research Hospital  
Garissa Cancer Centre  
Machakos Cancer Centre  
Bomet Cancer Centre  
Nakuru Cancer Centre  
Nakuru Cancer Centre  
Bomet Cancer Centre  
Kisumu Cancer Centre  
Machakos Cancer Centre  
Machakos Cancer Centre  
Bomet Cancer Centre  
Kisumu Cancer Centre  
Embu Cancer Centre  
Makueni Cancer Centre  
Machakos Cancer Centre  
Machakos Cancer Centre  
Bomet Cancer Centre  
Nakuru Cancer Centre  
Nakuru Cancer Centre  
Meru Cancer Centre  
Bomet Cancer Centre  
Mombasa Cancer Centre  
Bomet Cancer Centre  
Mombasa Cancer Centre  
Nakuru Cancer Centre  
Meru Cancer Centre  
Meru Cancer Centre  
Makueni Cancer Centre  
Machakos Cancer Centre

Makueni Cancer Centre  
Machakos Cancer Centre  
Bomet Cancer Centre  
Makueni Cancer Centre  
Machakos Cancer Centre  
Machakos Cancer Centre  
Bomet Cancer Centre  
Nyeri Cancer Centre  
Meru Cancer Centre  
Meru Cancer Centre  
Nyeri Cancer Centre  
Bomet Cancer Centre  
Mombasa Cancer Centre  
Taita Taveta Cancer Centre  
Machakos Cancer Centre  
Machakos Cancer Centre  
Meru Cancer Centre  
Meru Cancer Centre  
Mombasa Cancer Centre  
Bomet Cancer Centre  
Nakuru Cancer Centre  
Bomet Cancer Centre  
Bomet Cancer Centre  
Meru Cancer Centre  
Meru Cancer Centre  
Machakos Cancer Centre  
Taita Taveta Cancer Centre  
Mombasa Cancer Centre  
Mombasa Cancer Centre  
Makueni Cancer Centre  
Bomet Cancer Centre  
Machakos Cancer Centre  
Machakos Cancer Centre  
Machakos Cancer Centre  
Machakos Cancer Centre  
Meru Cancer Centre  
Nakuru Cancer Centre  
Nakuru Cancer Centre  
Bomet Cancer Centre  
Meru Cancer Centre  
Bomet Cancer Centre  
Meru Cancer Centre  
Nyeri Cancer Centre  
Nakuru Cancer Centre  
Makueni Cancer Centre  
Machakos Cancer Centre  
Meru Cancer Centre  
Taita Taveta Cancer Centre  
Machakos Cancer Centre  
Bomet Cancer Centre

Nyeri Cancer Centre  
Nyeri Cancer Centre  
Nakuru Cancer Centre  
Nakuru Cancer Centre  
Machakos Cancer Centre  
Nyeri Cancer Centre  
Machakos Cancer Centre  
Bomet Cancer Centre  
Bomet Cancer Centre  
Makueni Cancer Centre  
Nyeri Cancer Centre  
Bomet Cancer Centre  
Bomet Cancer Centre  
Makueni Cancer Centre  
Taita Taveta Cancer Centre  
Nakuru Cancer Centre  
Makueni Cancer Centre  
Nakuru Cancer Centre  
Bomet Cancer Centre  
Meru Cancer Centre  
Garissa Cancer Centre  
Mombasa Cancer Centre  
Mombasa Cancer Centre  
Nakuru Cancer Centre  
Meru Cancer Centre  
Meru Cancer Centre  
Makueni Cancer Centre  
Machakos Cancer Centre  
Makueni Cancer Centre  
Meru Cancer Centre  
Mombasa Cancer Centre  
Mombasa Cancer Centre  
Garissa Cancer Centre  
Machakos Cancer Centre  
Nakuru Cancer Centre  
Garissa Cancer Centre  
Makueni Cancer Centre  
Machakos Cancer Centre  
Nakuru Cancer Centre  
Mombasa Cancer Centre  
Mombasa Cancer Centre  
Garissa Cancer Centre  
Meru Cancer Centre  
Meru Cancer Centre  
Garissa Cancer Centre  
Garissa Cancer Centre  
Mombasa Cancer Centre  
Mombasa Cancer Centre  
Makueni Cancer Centre  
Machakos Cancer Centre

Meru Cancer Centre  
Meru Cancer Centre  
Meru Cancer Centre  
Nakuru Cancer Centre  
Machakos Cancer Centre  
Makueni Cancer Centre  
Meru Cancer Centre  
Mombasa Cancer Centre  
Mombasa Cancer Centre  
Garissa Cancer Centre  
Nakuru Cancer Centre  
Makueni Cancer Centre  
Garissa Cancer Centre  
Meru Cancer Centre  
Meru Cancer Centre  
Garissa Cancer Centre  
Machakos Cancer Centre  
Mombasa Cancer Centre  
Mombasa Cancer Centre  
Makueni Cancer Centre  
Meru Cancer Centre  
Meru Cancer Centre  
Garissa Cancer Centre  
Garissa Cancer Centre  
Nakuru Cancer Centre  
Machakos Cancer Centre  
Meru Cancer Centre  
Meru Cancer Centre  
Garissa Cancer Centre  
Garissa Cancer Centre  
Nakuru Cancer Centre  
Mombasa Cancer Centre  
Mombasa Cancer Centre  
Makueni Cancer Centre  
Machakos Cancer Centre  
Nakuru Cancer Centre  
Mombasa Cancer Centre  
Garissa Cancer Centre  
Garissa Cancer Centre  
Makueni Cancer Centre  
Nakuru Cancer Centre  
Mombasa Cancer Centre  
Machakos Cancer Centre  
Mombasa Cancer Centre  
Meru Cancer Centre  
Garissa Cancer Centre  
Garissa Cancer Centre  
Mombasa Cancer Centre  
Mombasa Cancer Centre  
Garissa Cancer Centre

Garissa Cancer Centre  
Meru Cancer Centre  
Machakos Cancer Centre  
Makueni Cancer Centre  
Nakuru Cancer Centre  
Makueni Cancer Centre  
Machakos Cancer Centre  
Meru Cancer Centre  
Meru Cancer Centre  
Nakuru Cancer Centre  
Garissa Cancer Centre  
Garissa Cancer Centre  
Mombasa Cancer Centre  
Mombasa Cancer Centre  
Bomet Cancer Centre  
Garissa Cancer Centre  
Makueni Cancer Centre  
Meru Cancer Centre  
Meru Cancer Centre  
Kisumu Cancer Centre  
Machakos Cancer Centre  
Makueni Cancer Centre  
Taita Taveta Cancer Centre  
Taita Taveta Cancer Centre  
Meru Cancer Centre  
Taita Taveta Cancer Centre  
Taita Taveta Cancer Centre  
Kisumu Cancer Centre  
Garissa Cancer Centre  
Bomet Cancer Centre  
Kisumu Cancer Centre  
Bomet Cancer Centre  
Machakos Cancer Centre  
Machakos Cancer Centre  
Kakamega Cancer Centre  
Taita Taveta Cancer Centre  
Taita Taveta Cancer Centre  
Nyeri Cancer Centre  
Garissa Cancer Centre  
Meru Cancer Centre  
Meru Cancer Centre  
Bomet Cancer Centre  
Mombasa Cancer Centre  
Mombasa Cancer Centre  
Garissa Cancer Centre  
Kisumu Cancer Centre  
Taita Taveta Cancer Centre  
Taita Taveta Cancer Centre  
Machakos Cancer Centre  
Machakos Cancer Centre

Meru Cancer Centre  
Meru Cancer Centre  
Makueni Cancer Centre  
Makueni Cancer Centre  
Meru Cancer Centre  
Bomet Cancer Centre  
Meru Cancer Centre  
Machakos Cancer Centre  
Machakos Cancer Centre  
Taita Taveta Cancer Centre  
Taita Taveta Cancer Centre  
Mombasa Cancer Centre  
Garissa Cancer Centre  
Garissa Cancer Centre  
Kisumu Cancer Centre  
Mombasa Cancer Centre  
Kisumu Cancer Centre  
Taita Taveta Cancer Centre  
Taita Taveta Cancer Centre  
Bomet Cancer Centre  
Garissa Cancer Centre  
Machakos Cancer Centre  
Kisumu Cancer Centre  
Meru Cancer Centre  
Garissa Cancer Centre  
Nakuru Cancer Centre  
Nakuru Cancer Centre  
Taita Taveta Cancer Centre  
Taita Taveta Cancer Centre  
Meru Cancer Centre  
Meru Cancer Centre  
Garissa Cancer Centre  
Nyeri Cancer Centre  
Makueni Cancer Centre  
Machakos Cancer Centre  
Meru Cancer Centre  
Taita Taveta Cancer Centre  
Taita Taveta Cancer Centre  
Nyeri Cancer Centre  
Machakos Cancer Centre  
Bomet Cancer Centre  
Kisumu Cancer Centre  
Garissa Cancer Centre  
Garissa Cancer Centre  
Nyeri Cancer Centre  
Taita Taveta Cancer Centre  
Taita Taveta Cancer Centre  
Machakos Cancer Centre  
Nakuru Cancer Centre  
Nyeri Cancer Centre

Machakos Cancer Centre  
Nakuru Cancer Centre  
Bomet Cancer Centre  
Garissa Cancer Centre  
Kisumu Cancer Centre  
Garissa Cancer Centre  
Bomet Cancer Centre  
Kisumu Cancer Centre  
Makueni Cancer Centre  
Taita Taveta Cancer Centre  
Taita Taveta Cancer Centre  
Kisumu Cancer Centre  
Nakuru Cancer Centre  
Nakuru Cancer Centre  
Machakos Cancer Centre  
Machakos Cancer Centre  
Kakamega Cancer Centre  
Meru Cancer Centre  
Taita Taveta Cancer Centre  
Taita Taveta Cancer Centre  
Bomet Cancer Centre  
Garissa Cancer Centre  
Bomet Cancer Centre  
Mombasa Cancer Centre  
Mombasa Cancer Centre  
Kakamega Cancer Centre  
Makueni Cancer Centre  
Kisumu Cancer Centre  
Meru Cancer Centre  
Meru Cancer Centre  
Makueni Cancer Centre  
Machakos Cancer Centre  
Machakos Cancer Centre  
Kisumu Cancer Centre  
Makueni Cancer Centre  
Makueni Cancer Centre  
Bomet Cancer Centre  
Makueni Cancer Centre  
Kisumu Cancer Centre  
Bomet Cancer Centre  
Machakos Cancer Centre  
Machakos Cancer Centre  
Nyeri Cancer Centre  
Taita Taveta Cancer Centre  
Meru Cancer Centre  
Meru Cancer Centre  
Mombasa Cancer Centre  
Bomet Cancer Centre  
Mombasa Cancer Centre  
Nyeri Cancer Centre

Meru Cancer Centre  
Taita Taveta Cancer Centre  
Kakamega Cancer Centre  
Machakos Cancer Centre  
Kisumu Cancer Centre  
Machakos Cancer Centre  
Meru Cancer Centre  
Makueni Cancer Centre  
Bomet Cancer Centre  
Machakos Cancer Centre  
Machakos Cancer Centre  
Makueni Cancer Centre  
Meru Cancer Centre  
Taita Taveta Cancer Centre  
Meru Cancer Centre  
Kisumu Cancer Centre  
Mombasa Cancer Centre  
Mombasa Cancer Centre  
Makueni Cancer Centre  
Makueni Cancer Centre  
Kisumu Cancer Centre  
Bomet Cancer Centre  
Machakos Cancer Centre  
Machakos Cancer Centre  
Nyeri Cancer Centre  
Makueni Cancer Centre  
Kisumu Cancer Centre  
Meru Cancer Centre  
Nakuru Cancer Centre  
Nakuru Cancer Centre  
Taita Taveta Cancer Centre  
Bomet Cancer Centre  
Meru Cancer Centre  
Meru Cancer Centre  
Bomet Cancer Centre  
Nyeri Cancer Centre  
Taita Taveta Cancer Centre  
Makueni Cancer Centre  
Machakos Cancer Centre  
Machakos Cancer Centre  
Meru Cancer Centre  
Kakamega Cancer Centre  
Taita Taveta Cancer Centre  
Nyeri Cancer Centre  
Kisumu Cancer Centre  
Makueni Cancer Centre  
Machakos Cancer Centre  
Nakuru Cancer Centre  
Taita Taveta Cancer Centre  
Machakos Cancer Centre

Nyeri Cancer Centre  
Nyeri Cancer Centre  
Nakuru Cancer Centre  
Bomet Cancer Centre  
Kisumu Cancer Centre  
Makueni Cancer Centre  
Makueni Cancer Centre  
Machakos Cancer Centre  
Nyeri Cancer Centre  
Machakos Cancer Centre  
Bomet Cancer Centre  
Kakamega Cancer Centre  
Kisumu Cancer Centre  
Makueni Cancer Centre  
Makueni Cancer Centre  
Taita Taveta Cancer Centre  
Kisumu Cancer Centre  
Nakuru Cancer Centre  
Nakuru Cancer Centre  
Makueni Cancer Centre  
Makueni Cancer Centre  
Machakos Cancer Centre  
Machakos Cancer Centre  
Bomet Cancer Centre  
Taita Taveta Cancer Centre  
Nyeri Cancer Centre  
Mombasa Cancer Centre  
Mombasa Cancer Centre  
Meru Cancer Centre  
Meru Cancer Centre  
Machakos Cancer Centre  
Kisumu Cancer Centre  
Makueni Cancer Centre  
Kisumu Cancer Centre  
Kakamega Cancer Centre  
Meru Cancer Centre  
Meru Cancer Centre  
Nyeri Cancer Centre  
Mombasa Cancer Centre  
Mombasa Cancer Centre  
Machakos Cancer Centre  
Nakuru Cancer Centre  
Kisumu Cancer Centre  
Kakamega Cancer Centre  
Kakamega Cancer Centre  
Machakos Cancer Centre  
Nyeri Cancer Centre  
Nyeri Cancer Centre  
Meru Cancer Centre  
Meru Cancer Centre

Mombasa Cancer Centre  
Mombasa Cancer Centre  
Makueni Cancer Centre  
Meru Cancer Centre  
Machakos Cancer Centre  
Kakamega Cancer Centre  
Kakamega Cancer Centre  
Meru Cancer Centre  
Kisumu Cancer Centre  
Nyeri Cancer Centre  
Meru Cancer Centre  
Machakos Cancer Centre  
Meru Cancer Centre  
Makueni Cancer Centre  
Mombasa Cancer Centre  
Kisumu Cancer Centre  
Mombasa Cancer Centre  
Kakamega Cancer Centre  
Kakamega Cancer Centre  
Makueni Cancer Centre  
Kisumu Cancer Centre  
Meru Cancer Centre  
Machakos Cancer Centre  
Kakamega Cancer Centre  
Nyeri Cancer Centre  
Mombasa Cancer Centre  
Makueni Cancer Centre  
Kisumu Cancer Centre  
Nyeri Cancer Centre  
Nakuru Cancer Centre  
Kakamega Cancer Centre  
Machakos Cancer Centre  
Kakamega Cancer Centre  
Meru Cancer Centre  
Meru Cancer Centre  
Nakuru Cancer Centre  
Mombasa Cancer Centre  
Nyeri Cancer Centre  
Kakamega Cancer Centre  
Machakos Cancer Centre  
Makueni Cancer Centre  
Meru Cancer Centre  
Meru Cancer Centre  
Nakuru Cancer Centre  
Nyeri Cancer Centre  
Kakamega Cancer Centre  
Nyeri Cancer Centre  
Kisumu Cancer Centre  
Mombasa Cancer Centre  
Makueni Cancer Centre

Nyeri Cancer Centre  
Nyeri Cancer Centre  
Nakuru Cancer Centre  
Kakamega Cancer Centre  
Machakos Cancer Centre  
Kisumu Cancer Centre  
Meru Cancer Centre  
Makueni Cancer Centre  
Nyeri Cancer Centre  
Nyeri Cancer Centre  
Kakamega Cancer Centre  
Kakamega Cancer Centre  
Machakos Cancer Centre  
Kisumu Cancer Centre  
Makueni Cancer Centre  
Makueni Cancer Centre  
Kisumu Cancer Centre  
Machakos Cancer Centre  
Kakamega Cancer Centre  
Nyeri Cancer Centre  
Kakamega Cancer Centre  
Meru Cancer Centre  
Nakuru Cancer Centre  
Mombasa Cancer Centre  
Mombasa Cancer Centre  
Nyeri Cancer Centre  
Garissa Cancer Centre  
Kisumu Cancer Centre  
Makueni Cancer Centre  
Meru Cancer Centre  
Meru Cancer Centre  
Machakos Cancer Centre  
Kakamega Cancer Centre  
Machakos Cancer Centre  
Taita Taveta Cancer Centre  
Taita Taveta Cancer Centre  
Kisumu Cancer Centre  
Meru Cancer Centre  
Meru Cancer Centre  
Kisumu Cancer Centre  
Makueni Cancer Centre  
Taita Taveta Cancer Centre  
Taita Taveta Cancer Centre  
Kisumu Cancer Centre  
Nyeri Cancer Centre  
Garissa Cancer Centre  
Nakuru Cancer Centre  
Kisumu Cancer Centre  
Kisumu Cancer Centre  
Machakos Cancer Centre

Machakos Cancer Centre  
Kakamega Cancer Centre  
Kakamega Cancer Centre  
Garissa Cancer Centre  
Nyeri Cancer Centre  
Taita Taveta Cancer Centre  
Meru Cancer Centre  
Meru Cancer Centre  
Garissa Cancer Centre  
Mombasa Cancer Centre  
Mombasa Cancer Centre  
Nyeri Cancer Centre  
Meru Cancer Centre  
Meru Cancer Centre  
Taita Taveta Cancer Centre  
Taita Taveta Cancer Centre  
Machakos Cancer Centre  
Machakos Cancer Centre  
Kakamega Cancer Centre  
Makueni Cancer Centre  
Nakuru Cancer Centre  
Kisumu Cancer Centre  
Kisumu Cancer Centre  
Nyeri Cancer Centre  
Nakuru Cancer Centre  
Makueni Cancer Centre  
Meru Cancer Centre  
Machakos Cancer Centre  
Machakos Cancer Centre  
Taita Taveta Cancer Centre  
Taita Taveta Cancer Centre  
Meru Cancer Centre  
Mombasa Cancer Centre  
Kisumu Cancer Centre  
Kakamega Cancer Centre  
Mombasa Cancer Centre  
Kisumu Cancer Centre  
Garissa Cancer Centre  
Taita Taveta Cancer Centre  
Taita Taveta Cancer Centre  
Nakuru Cancer Centre  
Makueni Cancer Centre  
Kisumu Cancer Centre  
Kisumu Cancer Centre  
Garissa Cancer Centre  
Meru Cancer Centre  
Kakamega Cancer Centre  
Machakos Cancer Centre  
Machakos Cancer Centre  
Nyeri Cancer Centre

Kisumu Cancer Centre  
Kisumu Cancer Centre  
Nyeri Cancer Centre  
Meru Cancer Centre  
Garissa Cancer Centre  
Nakuru Cancer Centre  
Nakuru Cancer Centre  
Taita Taveta Cancer Centre  
Taita Taveta Cancer Centre  
Kakamega Cancer Centre  
Machakos Cancer Centre  
Machakos Cancer Centre  
Meru Cancer Centre  
Meru Cancer Centre  
Nakuru Cancer Centre  
Nakuru Cancer Centre  
Nyeri Cancer Centre  
Taita Taveta Cancer Centre  
Taita Taveta Cancer Centre  
Machakos Cancer Centre  
Kakamega Cancer Centre  
Makueni Cancer Centre  
Machakos Cancer Centre  
Meru Cancer Centre  
Taita Taveta Cancer Centre  
Kakamega Cancer Centre  
Kisumu Cancer Centre  
Makueni Cancer Centre  
Kisumu Cancer Centre  
Mombasa Cancer Centre  
Nyeri Cancer Centre  
Machakos Cancer Centre  
Garissa Cancer Centre  
Nakuru Cancer Centre  
Nyeri Cancer Centre  
Machakos Cancer Centre  
Nakuru Cancer Centre  
Nakuru Cancer Centre  
Nyeri Cancer Centre  
Kakamega Cancer Centre  
Machakos Cancer Centre  
Kisumu Cancer Centre  
Kisumu Cancer Centre  
Makueni Cancer Centre  
Garissa Cancer Centre  
Taita Taveta Cancer Centre  
Taita Taveta Cancer Centre  
Nyeri Cancer Centre  
Meru Cancer Centre  
Machakos Cancer Centre

Kakamega Cancer Centre  
Kakamega Cancer Centre  
Makueni Cancer Centre  
Kisumu Cancer Centre  
Kisumu Cancer Centre  
Taita Taveta Cancer Centre  
Nakuru Cancer Centre  
Taita Taveta Cancer Centre  
Nakuru Cancer Centre  
Nakuru Cancer Centre  
Makueni Cancer Centre  
Kisumu Cancer Centre  
Kisumu Cancer Centre  
Machakos Cancer Centre  
Kakamega Cancer Centre  
Machakos Cancer Centre  
Meru Cancer Centre  
Taita Taveta Cancer Centre  
Taita Taveta Cancer Centre  
Garissa Cancer Centre  
Mombasa Cancer Centre  
Machakos Cancer Centre  
Garissa Cancer Centre  
Machakos Cancer Centre  
Machakos Cancer Centre  
Machakos Cancer Centre  
Mombasa Cancer Centre  
Garissa Cancer Centre  
Garissa Cancer Centre  
Machakos Cancer Centre

Machakos Cancer Centre  
Machakos Cancer Centre  
Mombasa Cancer Centre  
Machakos Cancer Centre  
Machakos Cancer Centre  
Machakos Cancer Centre  
Mombasa Cancer Centre  
Garissa Cancer Centre  
Mombasa Cancer Centre  
Garissa Cancer Centre  
Machakos Cancer Centre  
Garissa Cancer Centre  
Mombasa Cancer Centre  
Mombasa Cancer Centre  
Garissa Cancer Centre

[illegible]

[illegible]

[illegible]

Kenyatta National Hospital

[illegible]



[illegible]



[illegible]



[illegible]

[illegible]



[illegible]

[illegible]

Kenyatta National Hospital  
Kenyatta National Hospital  
Kenyatta National Hospital  
Machakos Cancer Centre  
Kenyatta National Hospital  
Machakos Cancer Centre  
Taita Taveta Cancer Centre  
Taita Taveta Cancer Centre  
Machakos Cancer Centre  
Taita Taveta Cancer Centre  
Kenyatta National Hospital  
Kenyatta National Hospital  
Kenyatta National Hospital  
Taita Taveta Cancer Centre  
Kenyatta National Hospital  
Machakos Cancer Centre  
Kenyatta National Hospital  
Taita Taveta Cancer Centre  
Machakos Cancer Centre  
Taita Taveta Cancer Centre  
Machakos Cancer Centre  
Machakos Cancer Centre  
Taita Taveta Cancer Centre  
Machakos Cancer Centre  
Kenyatta National Hospital  
Machakos Cancer Centre  
Taita Taveta Cancer Centre  
Machakos Cancer Centre  
Kenyatta National Hospital  
Taita Taveta Cancer Centre  
Kenyatta National Hospital  
Meru Cancer Centre  
Meru Cancer Centre  
Meru Cancer Centre  
Meru Cancer Centre  
Makueni Cancer Centre  
Meru Cancer Centre

Meru Cancer Centre  
Meru Cancer Centre  
Meru Cancer Centre  
Makueni Cancer Centre  
Makueni Cancer Centre  
Makueni Cancer Centre  
Makueni Cancer Centre  
Meru Cancer Centre  
Makueni Cancer Centre  
Meru Cancer Centre  
Meru Cancer Centre  
Makueni Cancer Centre  
Meru Cancer Centre  
Meru Cancer Centre  
Meru Cancer Centre  
Meru Cancer Centre  
Makueni Cancer Centre  
Meru Cancer Centre  
Meru Cancer Centre  
Makueni Cancer Centre  
Meru Cancer Centre  
Meru Cancer Centre  
Makueni Cancer Centre

[illegible]

[illegible]

[illegible]

[illegible]



Kenyatta University Teaching Refferal and Research Hospital  
Kenyatta University Teaching Refferal and Research Hospital  
Nyeri Cancer Centre  
Kenyatta University Teaching Refferal and Research Hospital  
Mombasa Cancer Centre  
Nyeri Cancer Centre  
Nyeri Cancer Centre  
Nyeri Cancer Centre  
Nyeri Cancer Centre  
Kenyatta National Hospital  
Kenyatta National Hospital  
Kenyatta National Hospital  
Nyeri Cancer Centre  
Nyeri Cancer Centre  
Nyeri Cancer Centre  
Kenyatta National Hospital  
Kenyatta National Hospital  
Kenyatta National Hospital  
Mombasa Cancer Centre  
Mombasa Cancer Centre  
Meru Cancer Centre  
Meru Cancer Centre  
Meru Cancer Centre  
Kenyatta National Hospital  
Kenyatta National Hospital  
Kenyatta National Hospital  
Kisumu Cancer Centre  
Nyeri Cancer Centre  
Mombasa Cancer Centre  
Kenyatta University Teaching Refferal and Research Hospital  
Kenyatta University Teaching Refferal and Research Hospital  
Kenyatta University Teaching Refferal and Research Hospital  
Kenyatta National Hospital  
Kenyatta National Hospital  
Nyeri Cancer Centre  
Kisumu Cancer Centre  
Kisumu Cancer Centre

Kisumu Cancer Centre  
Kisumu Cancer Centre  
Kenyatta University Teaching Referral and Research Hospital  
Nyeri Cancer Centre  
Kenyatta University Teaching Referral and Research Hospital  
Nyeri Cancer Centre  
Kenyatta National Hospital  
Kenyatta National Hospital  
Nyeri Cancer Centre  
Mombasa Cancer Centre  
Nyeri Cancer Centre  
Meru Cancer Centre  
Meru Cancer Centre  
Kenyatta National Hospital  
Kenyatta National Hospital  
Kenyatta National Hospital  
Nyeri Cancer Centre  
Kenyatta National Hospital  
Meru Cancer Centre  
Meru Cancer Centre  
Meru Cancer Centre  
Kenyatta University Teaching Referral and Research Hospital  
Kenyatta University Teaching Referral and Research Hospital  
Kenyatta University Teaching Referral and Research Hospital  
Machakos Cancer Centre  
Nyeri Cancer Centre  
Meru Cancer Centre  
Mombasa Cancer Centre  
Meru Cancer Centre  
Meru Cancer Centre  
Meru Cancer Centre  
Nyeri Cancer Centre  
Mombasa Cancer Centre  
Nyeri Cancer Centre  
Makueni Cancer Centre  
Makueni Cancer Centre  
Kenyatta University Teaching Referral and Research Hospital  
Kenyatta University Teaching Referral and Research Hospital  
Meru Cancer Centre  
Kenyatta University Teaching Referral and Research Hospital  
Kenyatta National Hospital  
Kenyatta National Hospital  
Kenyatta National Hospital  
Kenyatta National Hospital  
Kenyatta University Teaching Referral and Research Hospital  
Kenyatta National Hospital  
Kenyatta University Teaching Referral and Research Hospital  
Kenyatta University Teaching Referral and Research Hospital  
Kenyatta National Hospital  
Meru Cancer Centre

Meru Cancer Centre  
Meru Cancer Centre  
Mombasa Cancer Centre  
Mombasa Cancer Centre  
Mombasa Cancer Centre  
Makueni Cancer Centre  
Makueni Cancer Centre  
Makueni Cancer Centre  
Kenyatta National Hospital  
Kenyatta National Hospital  
Kenyatta National Hospital  
Makueni Cancer Centre  
Kenyatta National Hospital  
Meru Cancer Centre  
Kenyatta National Hospital  
Kenyatta National Hospital  
Kenyatta National Hospital  
Meru Cancer Centre  
Kenyatta National Hospital  
Taita Taveta Cancer Centre  
Kenyatta National Hospital  
Kenyatta National Hospital  
Meru Cancer Centre  
Meru Cancer Centre  
Meru Cancer Centre  
Kenyatta National Hospital  
Makueni Cancer Centre  
Makueni Cancer Centre  
Kenyatta National Hospital  
Kenyatta National Hospital  
Kenyatta National Hospital  
Kenyatta University Teaching Referral and Research Hospital  
Kenyatta University Teaching Referral and Research Hospital  
Kenyatta National Hospital  
Garissa Cancer Centre  
Nyeri Cancer Centre  
Nakuru Cancer Centre  
Nyeri Cancer Centre  
Nyeri Cancer Centre  
Nyeri Cancer Centre

Kakamega Cancer Centre  
Kakamega Cancer Centre  
Taita Taveta Cancer Centre  
Kakamega Cancer Centre  
Makueni Cancer Centre  
Taita Taveta Cancer Centre  
Makueni Cancer Centre  
Meru Cancer Centre  
Nyeri Cancer Centre  
Nyeri Cancer Centre  
Garissa Cancer Centre  
Nakuru Cancer Centre  
Nakuru Cancer Centre  
Kakamega Cancer Centre  
Nakuru Cancer Centre  
Nakuru Cancer Centre  
Kakamega Cancer Centre  
Makueni Cancer Centre  
Makueni Cancer Centre  
Makueni Cancer Centre  
Kakamega Cancer Centre  
Kakamega Cancer Centre  
Nakuru Cancer Centre  
Taita Taveta Cancer Centre  
Garissa Cancer Centre  
Garissa Cancer Centre  
Nyeri Cancer Centre  
Makueni Cancer Centre  
Kakamega Cancer Centre  
Nakuru Cancer Centre  
Makueni Cancer Centre  
Makueni Cancer Centre  
Makueni Cancer Centre  
Makueni Cancer Centre  
Nakuru Cancer Centre  
Nakuru Cancer Centre  
Nyeri Cancer Centre  
Kakamega Cancer Centre  
Kakamega Cancer Centre  
Kakamega Cancer Centre  
Garissa Cancer Centre  
Kakamega Cancer Centre  
Meru Cancer Centre  
Bomet Cancer Centre  
Meru Cancer Centre  
Meru Cancer Centre  
Nakuru Cancer Centre  
Kakamega Cancer Centre  
Kakamega Cancer Centre  
Nyeri Cancer Centre

Mombasa Cancer Centre  
Kakamega Cancer Centre  
Machakos Cancer Centre  
Makueni Cancer Centre  
Makueni Cancer Centre  
Nyeri Cancer Centre  
Nyeri Cancer Centre  
Mombasa Cancer Centre  
Meru Cancer Centre  
Meru Cancer Centre  
Garissa Cancer Centre  
Kakamega Cancer Centre  
Kakamega Cancer Centre  
Machakos Cancer Centre  
Bomet Cancer Centre  
Garissa Cancer Centre  
Bomet Cancer Centre  
Garissa Cancer Centre  
Nakuru Cancer Centre  
Nyeri Cancer Centre  
Nyeri Cancer Centre  
Nyeri Cancer Centre  
Nyeri Cancer Centre  
Taita Taveta Cancer Centre  
Taita Taveta Cancer Centre  
Taita Taveta Cancer Centre  
Kisumu Cancer Centre  
Kisumu Cancer Centre  
Makueni Cancer Centre  
Kisumu Cancer Centre  
Kakamega Cancer Centre  
Kisumu Cancer Centre  
Machakos Cancer Centre  
Machakos Cancer Centre  
Machakos Cancer Centre  
Meru Cancer Centre  
Meru Cancer Centre  
Meru Cancer Centre  
Meru Cancer Centre  
Taita Taveta Cancer Centre  
Machakos Cancer Centre  
Nakuru Cancer Centre  
Kakamega Cancer Centre  
Mombasa Cancer Centre  
Makueni Cancer Centre  
Bomet Cancer Centre  
Makueni Cancer Centre  
Bomet Cancer Centre  
Makueni Cancer Centre  
Mombasa Cancer Centre

Kakamega Cancer Centre  
Nakuru Cancer Centre  
Kakamega Cancer Centre  
Kakamega Cancer Centre  
Meru Cancer Centre  
Meru Cancer Centre  
Garissa Cancer Centre  
Kakamega Cancer Centre  
Kakamega Cancer Centre  
Nyeri Cancer Centre  
Meru Cancer Centre  
Garissa Cancer Centre  
Garissa Cancer Centre  
Meru Cancer Centre  
Meru Cancer Centre  
Machakos Cancer Centre  
Machakos Cancer Centre  
Kakamega Cancer Centre  
Makueni Cancer Centre  
Nakuru Cancer Centre  
Makueni Cancer Centre  
Makueni Cancer Centre  
Makueni Cancer Centre  
Kakamega Cancer Centre  
Nyeri Cancer Centre  
Machakos Cancer Centre  
Machakos Cancer Centre  
Nyeri Cancer Centre  
Nyeri Cancer Centre  
Mombasa Cancer Centre  
Kakamega Cancer Centre  
Meru Cancer Centre  
Taita Taveta Cancer Centre  
Meru Cancer Centre  
Meru Cancer Centre  
Meru Cancer Centre  
Garissa Cancer Centre  
Nyeri Cancer Centre  
Nyeri Cancer Centre  
Makueni Cancer Centre  
Makueni Cancer Centre  
Makueni Cancer Centre  
Nyeri Cancer Centre  
Nyeri Cancer Centre  
Nyeri Cancer Centre  
Machakos Cancer Centre  
Meru Cancer Centre  
Meru Cancer Centre  
Meru Cancer Centre  
Meru Cancer Centre

[illegible]

Kenyatta University Teaching Referral and Research Hospital

[illegible]





[illegible]

[illegible]

[illegible]

[illegible]

Kenyatta National Hospital  
Nyeri Cancer Centre  
Kakamega Cancer Centre  
Nakuru Cancer Centre  
Kakamega Cancer Centre  
Nakuru Cancer Centre  
Nakuru Cancer Centre  
Kakamega Cancer Centre  
Nakuru Cancer Centre  
Nyeri Cancer Centre  
Nyeri Cancer Centre  
Kakamega Cancer Centre  
Garissa Cancer Centre  
Machakos Cancer Centre

Meru Cancer Centre  
Machakos Cancer Centre  
Machakos Cancer Centre  
Meru Cancer Centre  
Nyeri Cancer Centre  
Nyeri Cancer Centre  
Mombasa Cancer Centre  
Kakamega Cancer Centre  
Mombasa Cancer Centre  
Nyeri Cancer Centre  
Nyeri Cancer Centre  
Garissa Cancer Centre  
Mombasa Cancer Centre  
Kakamega Cancer Centre  
Nakuru Cancer Centre  
Kakamega Cancer Centre  
Kakamega Cancer Centre  
Kakamega Cancer Centre  
Mombasa Cancer Centre  
Nakuru Cancer Centre  
Mombasa Cancer Centre  
Mombasa Cancer Centre  
Mombasa Cancer Centre  
Mombasa Cancer Centre  
Makueni Cancer Centre  
Kakamega Cancer Centre  
Kakamega Cancer Centre  
Kakamega Cancer Centre  
Nakuru Cancer Centre  
Mombasa Cancer Centre  
Garissa Cancer Centre  
Nyeri Cancer Centre  
Garissa Cancer Centre  
Kakamega Cancer Centre  
Kakamega Cancer Centre  
Nakuru Cancer Centre  
Nakuru Cancer Centre

Nakuru Cancer Centre  
Kakamega Cancer Centre  
Nakuru Cancer Centre  
Kakamega Cancer Centre  
Nakuru Cancer Centre  
Nakuru Cancer Centre  
Nyeri Cancer Centre  
Nyeri Cancer Centre  
Nyeri Cancer Centre  
Nakuru Cancer Centre  
Nyeri Cancer Centre  
Nakuru Cancer Centre  
Machakos Cancer Centre  
Nyeri Cancer Centre  
Kakamega Cancer Centre  
Kakamega Cancer Centre  
Garissa Cancer Centre  
Makueni Cancer Centre  
Taita Taveta Cancer Centre  
Kakamega Cancer Centre  
Garissa Cancer Centre  
Meru Cancer Centre  
Kakamega Cancer Centre  
Machakos Cancer Centre  
Mombasa Cancer Centre  
Mombasa Cancer Centre  
Mombasa Cancer Centre  
Mombasa Cancer Centre  
Nyeri Cancer Centre  
Mombasa Cancer Centre  
Mombasa Cancer Centre  
Nyeri Cancer Centre  
Nakuru Cancer Centre  
Nakuru Cancer Centre  
Nakuru Cancer Centre  
Nakuru Cancer Centre  
Mombasa Cancer Centre  
Kakamega Cancer Centre  
Nyeri Cancer Centre  
Nyeri Cancer Centre  
Makueni Cancer Centre  
Mombasa Cancer Centre  
Nyeri Cancer Centre  
Mombasa Cancer Centre  
Mombasa Cancer Centre

Nyeri Cancer Centre  
Mombasa Cancer Centre  
Mombasa Cancer Centre  
Meru Cancer Centre  
Meru Cancer Centre  
Meru Cancer Centre  
Garissa Cancer Centre  
Garissa Cancer Centre  
Nakuru Cancer Centre  
Mombasa Cancer Centre  
Nakuru Cancer Centre  
Nakuru Cancer Centre  
Mombasa Cancer Centre  
Mombasa Cancer Centre  
Mombasa Cancer Centre  
Kakamega Cancer Centre  
Machakos Cancer Centre  
Kakamega Cancer Centre  
Kakamega Cancer Centre  
Meru Cancer Centre  
Kakamega Cancer Centre  
Kakamega Cancer Centre  
Kakamega Cancer Centre  
Mombasa Cancer Centre  
Machakos Cancer Centre  
Kakamega Cancer Centre  
Garissa Cancer Centre  
Mombasa Cancer Centre  
Nyeri Cancer Centre  
Makueni Cancer Centre  
Mombasa Cancer Centre  
Mombasa Cancer Centre  
Nyeri Cancer Centre  
Makueni Cancer Centre  
Mombasa Cancer Centre  
Nyeri Cancer Centre  
Nakuru Cancer Centre  
Kakamega Cancer Centre  
Nakuru Cancer Centre  
Mombasa Cancer Centre  
Taita Taveta Cancer Centre  
Mombasa Cancer Centre  
Mombasa Cancer Centre  
Mombasa Cancer Centre  
Mombasa Cancer Centre

Mombasa Cancer Centre  
Mombasa Cancer Centre  
Kakamega Cancer Centre  
Mombasa Cancer Centre  
Meru Cancer Centre  
Meru Cancer Centre  
Meru Cancer Centre  
Makueni Cancer Centre  
Garissa Cancer Centre  
Kakamega Cancer Centre  
Kakamega Cancer Centre  
Meru Cancer Centre  
Makueni Cancer Centre  
Meru Cancer Centre  
Mombasa Cancer Centre  
Mombasa Cancer Centre  
Mombasa Cancer Centre  
Meru Cancer Centre  
Garissa Cancer Centre  
Meru Cancer Centre  
Meru Cancer Centre  
Meru Cancer Centre  
Meru Cancer Centre  
Kakamega Cancer Centre  
Machakos Cancer Centre  
Machakos Cancer Centre  
Makueni Cancer Centre  
Kakamega Cancer Centre  
Kakamega Cancer Centre  
Nakuru Cancer Centre  
Nakuru Cancer Centre  
Nakuru Cancer Centre  
Mombasa Cancer Centre  
Nakuru Cancer Centre  
Mombasa Cancer Centre  
Mombasa Cancer Centre  
Mombasa Cancer Centre  
Nakuru Cancer Centre  
Mombasa Cancer Centre  
Mombasa Cancer Centre  
Mombasa Cancer Centre  
Nakuru Cancer Centre  
Mombasa Cancer Centre  
Nyeri Cancer Centre  
Nyeri Cancer Centre  
Kakamega Cancer Centre  
Mombasa Cancer Centre  
Mombasa Cancer Centre  
Mombasa Cancer Centre  
Mombasa Cancer Centre

Mombasa Cancer Centre  
Nyeri Cancer Centre  
Mombasa Cancer Centre  
Mombasa Cancer Centre  
Mombasa Cancer Centre  
Kakamega Cancer Centre  
Mombasa Cancer Centre  
Meru Cancer Centre  
Garissa Cancer Centre  
Kakamega Cancer Centre  
Nakuru Cancer Centre  
Machakos Cancer Centre  
Taita Taveta Cancer Centre  
Makueni Cancer Centre  
Machakos Cancer Centre  
Meru Cancer Centre  
Meru Cancer Centre  
Makueni Cancer Centre  
Nyeri Cancer Centre  
Kakamega Cancer Centre  
Nakuru Cancer Centre  
Nakuru Cancer Centre  
Nyeri Cancer Centre  
Mombasa Cancer Centre  
Taita Taveta Cancer Centre  
Nyeri Cancer Centre  
Nyeri Cancer Centre  
Nyeri Cancer Centre  
Nakuru Cancer Centre  
Nakuru Cancer Centre  
Nakuru Cancer Centre  
Nyeri Cancer Centre  
Nakuru Cancer Centre  
Kakamega Cancer Centre  
Makueni Cancer Centre  
Taita Taveta Cancer Centre  
Garissa Cancer Centre  
Meru Cancer Centre  
Meru Cancer Centre  
Meru Cancer Centre  
Meru Cancer Centre  
Kakamega Cancer Centre  
Nakuru Cancer Centre  
Machakos Cancer Centre  
Nyeri Cancer Centre  
Kakamega Cancer Centre  
Kakamega Cancer Centre  
Kakamega Cancer Centre  
Bomet Cancer Centre  
Kakamega Cancer Centre

Nyeri Cancer Centre  
Kakamega Cancer Centre  
Makueni Cancer Centre  
Mombasa Cancer Centre  
Nyeri Cancer Centre  
Nakuru Cancer Centre  
Nakuru Cancer Centre  
Meru Cancer Centre  
Nyeri Cancer Centre  
Nyeri Cancer Centre  
Meru Cancer Centre  
Meru Cancer Centre  
Meru Cancer Centre  
Kakamega Cancer Centre  
Nyeri Cancer Centre  
Nyeri Cancer Centre  
Meru Cancer Centre  
Nyeri Cancer Centre  
Nakuru Cancer Centre  
Nakuru Cancer Centre  
Nyeri Cancer Centre  
Kakamega Cancer Centre  
Machakos Cancer Centre  
Garissa Cancer Centre  
Taita Taveta Cancer Centre  
Makueni Cancer Centre  
Machakos Cancer Centre  
Machakos Cancer Centre  
Machakos Cancer Centre  
Meru Cancer Centre  
Nyeri Cancer Centre  
Nakuru Cancer Centre  
Bomet Cancer Centre  
Makueni Cancer Centre  
Makueni Cancer Centre  
Bomet Cancer Centre  
Nyeri Cancer Centre  
Nyeri Cancer Centre  
Nyeri Cancer Centre  
Makueni Cancer Centre  
Nyeri Cancer Centre  
Nyeri Cancer Centre  
Garissa Cancer Centre  
Nakuru Cancer Centre  
Kakamega Cancer Centre  
Makueni Cancer Centre  
Makueni Cancer Centre  
Nyeri Cancer Centre  
Nakuru Cancer Centre  
Kakamega Cancer Centre

Nakuru Cancer Centre  
Makueni Cancer Centre  
Nyeri Cancer Centre  
Nyeri Cancer Centre  
Mombasa Cancer Centre  
Makueni Cancer Centre  
Makueni Cancer Centre  
Makueni Cancer Centre  
Mombasa Cancer Centre  
Nyeri Cancer Centre  
Nyeri Cancer Centre  
Nyeri Cancer Centre  
Meru Cancer Centre  
Taita Taveta Cancer Centre  
Kakamega Cancer Centre  
Bomet Cancer Centre  
Machakos Cancer Centre  
Nakuru Cancer Centre  
Makueni Cancer Centre  
Kisumu Cancer Centre  
Kakamega Cancer Centre  
Kakamega Cancer Centre  
Kakamega Cancer Centre  
Meru Cancer Centre  
Machakos Cancer Centre  
Mombasa Cancer Centre  
Machakos Cancer Centre  
Nakuru Cancer Centre  
Mombasa Cancer Centre  
Mombasa Cancer Centre  
Makueni Cancer Centre  
Kakamega Cancer Centre  
Meru Cancer Centre  
Makueni Cancer Centre  
Meru Cancer Centre  
Nyeri Cancer Centre  
Nyeri Cancer Centre  
Machakos Cancer Centre  
Machakos Cancer Centre  
Nakuru Cancer Centre  
Bomet Cancer Centre  
Kakamega Cancer Centre  
Mombasa Cancer Centre  
Kakamega Cancer Centre  
Nakuru Cancer Centre  
Kenyatta University Teaching Referral and Research Hospital  
Nakuru Cancer Centre  
Nakuru Cancer Centre  
Meru Cancer Centre  
Meru Cancer Centre

Mombasa Cancer Centre  
Makueni Cancer Centre  
Mombasa Cancer Centre  
Nakuru Cancer Centre  
Nakuru Cancer Centre  
Nakuru Cancer Centre  
Meru Cancer Centre  
Meru Cancer Centre  
Kenyatta University Teaching Referral and Research Hospital  
Kenyatta University Teaching Referral and Research Hospital  
Mombasa Cancer Centre  
Mombasa Cancer Centre  
Mombasa Cancer Centre  
Kenyatta University Teaching Referral and Research Hospital  
Kenyatta University Teaching Referral and Research Hospital  
Mombasa Cancer Centre  
Mombasa Cancer Centre  
Kenyatta National Hospital  
Nakuru Cancer Centre  
Mombasa Cancer Centre  
Mombasa Cancer Centre  
Nakuru Cancer Centre  
Mombasa Cancer Centre  
Mombasa Cancer Centre  
Mombasa Cancer Centre  
Kenyatta University Teaching Referral and Research Hospital  
Kenyatta University Teaching Referral and Research Hospital  
Kenyatta University Teaching Referral and Research Hospital  
Mombasa Cancer Centre  
Mombasa Cancer Centre  
Meru Cancer Centre  
Mombasa Cancer Centre  
Mombasa Cancer Centre  
Nakuru Cancer Centre  
Meru Cancer Centre  
Embu Cancer Centre  
Kenyatta National Hospital  
Mombasa Cancer Centre  
Machakos Cancer Centre  
Nakuru Cancer Centre  
Kenyatta University Teaching Referral and Research Hospital  
Kenyatta University Teaching Referral and Research Hospital  
Nakuru Cancer Centre  
Kenyatta University Teaching Referral and Research Hospital  
Kenyatta University Teaching Referral and Research Hospital  
Meru Cancer Centre  
Mombasa Cancer Centre  
Meru Cancer Centre  
Mombasa Cancer Centre  
Nakuru Cancer Centre

Mombasa Cancer Centre  
Mombasa Cancer Centre  
Nakuru Cancer Centre  
Nakuru Cancer Centre  
Meru Cancer Centre  
Mombasa Cancer Centre  
Mombasa Cancer Centre  
Kenyatta University Teaching Referral and Research Hospital  
Kenyatta University Teaching Referral and Research Hospital  
Mombasa Cancer Centre  
Mombasa Cancer Centre  
Kenyatta University Teaching Referral and Research Hospital  
Kenyatta University Teaching Referral and Research Hospital  
Machakos Cancer Centre  
Mombasa Cancer Centre  
Mombasa Cancer Centre  
Kakamega Cancer Centre  
Nakuru Cancer Centre  
Embu Cancer Centre  
Kakamega Cancer Centre  
Kenyatta University Teaching Referral and Research Hospital  
Nakuru Cancer Centre  
Kenyatta University Teaching Referral and Research Hospital  
Mombasa Cancer Centre  
Machakos Cancer Centre  
Machakos Cancer Centre  
Meru Cancer Centre  
Mombasa Cancer Centre  
Kenyatta University Teaching Referral and Research Hospital  
Mombasa Cancer Centre  
Mombasa Cancer Centre  
Kenyatta University Teaching Referral and Research Hospital  
Meru Cancer Centre  
Kenyatta University Teaching Referral and Research Hospital  
Kenyatta University Teaching Referral and Research Hospital  
Mombasa Cancer Centre  
Mombasa Cancer Centre  
Meru Cancer Centre  
Meru Cancer Centre  
Kenyatta University Teaching Referral and Research Hospital  
Kenyatta University Teaching Referral and Research Hospital  
Mombasa Cancer Centre  
Mombasa Cancer Centre  
Kenyatta National Hospital  
Meru Cancer Centre  
Kenyatta National Hospital  
Nyeri Cancer Centre  
Machakos Cancer Centre  
Nakuru Cancer Centre  
Nakuru Cancer Centre

Embu Cancer Centre  
Kisumu Cancer Centre  
Kenyatta University Teaching Referral and Research Hospital  
Kenyatta University Teaching Referral and Research Hospital  
Kisumu Cancer Centre  
Nakuru Cancer Centre  
Kenyatta University Teaching Referral and Research Hospital  
Kenyatta University Teaching Referral and Research Hospital  
Kakamega Cancer Centre  
Kakamega Cancer Centre  
Meru Cancer Centre  
Mombasa Cancer Centre  
Mombasa Cancer Centre  
Meru Cancer Centre  
Kenyatta University Teaching Referral and Research Hospital  
Kenyatta University Teaching Referral and Research Hospital  
Kakamega Cancer Centre  
Kakamega Cancer Centre  
Machakos Cancer Centre  
Kenyatta National Hospital  
Nyeri Cancer Centre  
Nakuru Cancer Centre  
Mombasa Cancer Centre  
Mombasa Cancer Centre  
Meru Cancer Centre  
Kenyatta National Hospital  
Kisumu Cancer Centre  
Nakuru Cancer Centre  
Nakuru Cancer Centre  
Garissa Cancer Centre  
Kakamega Cancer Centre  
Nyeri Cancer Centre  
Machakos Cancer Centre  
Nyeri Cancer Centre  
Nakuru Cancer Centre  
Nakuru Cancer Centre  
Kenyatta National Hospital  
Embu Cancer Centre  
Nakuru Cancer Centre  
Kisumu Cancer Centre  
Meru Cancer Centre  
Meru Cancer Centre  
Mombasa Cancer Centre  
Mombasa Cancer Centre  
Kakamega Cancer Centre  
Kenyatta University Teaching Referral and Research Hospital  
Kenyatta University Teaching Referral and Research Hospital  
Kakamega Cancer Centre  
Kisumu Cancer Centre  
Meru Cancer Centre

Meru Cancer Centre  
Mombasa Cancer Centre  
Mombasa Cancer Centre  
Kenyatta University Teaching Referral and Research Hospital  
Kenyatta National Hospital  
Kenyatta University Teaching Referral and Research Hospital  
Kenyatta National Hospital  
Kenyatta National Hospital  
Kenyatta National Hospital  
Mombasa Cancer Centre  
Mombasa Cancer Centre  
Nyeri Cancer Centre  
Nakuru Cancer Centre  
Nakuru Cancer Centre  
Embu Cancer Centre  
Machakos Cancer Centre  
Kakamega Cancer Centre  
Kenyatta University Teaching Referral and Research Hospital  
Embu Cancer Centre  
Kenyatta University Teaching Referral and Research Hospital  
Nakuru Cancer Centre  
Nakuru Cancer Centre  
Kisumu Cancer Centre  
Nyeri Cancer Centre  
Meru Cancer Centre  
Meru Cancer Centre  
Machakos Cancer Centre  
Mombasa Cancer Centre  
Mombasa Cancer Centre  
Nyeri Cancer Centre  
Kenyatta University Teaching Referral and Research Hospital  
Mombasa Cancer Centre  
Kenyatta National Hospital  
Mombasa Cancer Centre  
Kenyatta National Hospital  
Meru Cancer Centre  
Taita Taveta Cancer Centre  
Kenyatta University Teaching Referral and Research Hospital  
Kenyatta University Teaching Referral and Research Hospital  
Mombasa Cancer Centre  
Kenyatta University Teaching Referral and Research Hospital  
Mombasa Cancer Centre  
Kenyatta National Hospital  
Kenyatta National Hospital  
Kisumu Cancer Centre  
Kakamega Cancer Centre  
Meru Cancer Centre  
Meru Cancer Centre  
Nakuru Cancer Centre  
Nyeri Cancer Centre

Meru Cancer Centre  
Kenyatta University Teaching Referral and Research Hospital  
Machakos Cancer Centre  
Meru Cancer Centre  
Kakamega Cancer Centre  
Kenyatta University Teaching Referral and Research Hospital  
Kakamega Cancer Centre  
Embu Cancer Centre  
Kenyatta National Hospital  
Kenyatta National Hospital  
Kisumu Cancer Centre  
Mombasa Cancer Centre  
Mombasa Cancer Centre  
Nyeri Cancer Centre  
Kenyatta National Hospital  
Kenyatta National Hospital  
Machakos Cancer Centre  
Machakos Cancer Centre  
Nakuru Cancer Centre  
Nakuru Cancer Centre  
Kisumu Cancer Centre  
Kenyatta University Teaching Referral and Research Hospital  
Kenyatta University Teaching Referral and Research Hospital  
Nakuru Cancer Centre  
Nakuru Cancer Centre  
Kenyatta University Teaching Referral and Research Hospital  
Kenyatta University Teaching Referral and Research Hospital  
Kakamega Cancer Centre  
Makueni Cancer Centre  
Mombasa Cancer Centre  
Mombasa Cancer Centre  
Kisumu Cancer Centre  
Meru Cancer Centre  
Meru Cancer Centre  
Machakos Cancer Centre  
Kenyatta University Teaching Referral and Research Hospital  
Kenyatta University Teaching Referral and Research Hospital  
Kenyatta National Hospital  
Makueni Cancer Centre  
Kakamega Cancer Centre  
Machakos Cancer Centre  
Kenyatta National Hospital  
Machakos Cancer Centre  
Nyeri Cancer Centre  
Nyeri Cancer Centre  
Nakuru Cancer Centre  
Embu Cancer Centre  
Nakuru Cancer Centre  
Mombasa Cancer Centre  
Mombasa Cancer Centre

Kenyatta National Hospital  
Kenyatta National Hospital  
Kisumu Cancer Centre  
Makueni Cancer Centre  
Nakuru Cancer Centre  
Nakuru Cancer Centre  
Nyeri Cancer Centre  
Machakos Cancer Centre  
Nyeri Cancer Centre  
Nakuru Cancer Centre  
Nakuru Cancer Centre  
Machakos Cancer Centre  
Makueni Cancer Centre  
Kakamega Cancer Centre  
Kenyatta National Hospital  
Kenyatta National Hospital  
Kisumu Cancer Centre  
Embu Cancer Centre  
Nakuru Cancer Centre  
Nakuru Cancer Centre  
Kisumu Cancer Centre  
Meru Cancer Centre  
Meru Cancer Centre  
Makueni Cancer Centre  
Kakamega Cancer Centre  
Mombasa Cancer Centre  
Kakamega Cancer Centre  
Mombasa Cancer Centre  
Kenyatta University Teaching Referral and Research Hospital  
Kenyatta University Teaching Referral and Research Hospital  
Kakamega Cancer Centre  
Makueni Cancer Centre  
Meru Cancer Centre  
Makueni Cancer Centre  
Kisumu Cancer Centre  
Mombasa Cancer Centre  
Mombasa Cancer Centre  
Embu Cancer Centre  
Kenyatta National Hospital  
Machakos Cancer Centre  
Kenyatta University Teaching Referral and Research Hospital  
Machakos Cancer Centre  
Kenyatta National Hospital  
Kenyatta University Teaching Referral and Research Hospital  
Mombasa Cancer Centre  
Mombasa Cancer Centre  
Kenyatta National Hospital  
Kenyatta National Hospital  
Nakuru Cancer Centre  
Nakuru Cancer Centre

Nyeri Cancer Centre  
Embu Cancer Centre  
Kakamega Cancer Centre  
Machakos Cancer Centre  
Machakos Cancer Centre  
Makueni Cancer Centre  
Mombasa Cancer Centre  
Mombasa Cancer Centre  
Embu Cancer Centre  
Nakuru Cancer Centre  
Nakuru Cancer Centre  
Nyeri Cancer Centre  
Kenyatta National Hospital  
Machakos Cancer Centre  
Kenyatta University Teaching Referral and Research Hospital  
Meru Cancer Centre  
Meru Cancer Centre  
Kisumu Cancer Centre  
Kenyatta National Hospital  
Kenyatta University Teaching Referral and Research Hospital  
Kakamega Cancer Centre  
Nyeri Cancer Centre  
Nyeri Cancer Centre  
Makueni Cancer Centre  
Mombasa Cancer Centre  
Mombasa Cancer Centre  
Kenyatta National Hospital  
Kenyatta University Teaching Referral and Research Hospital  
Kenyatta National Hospital  
Embu Cancer Centre  
Meru Cancer Centre  
Kenyatta University Teaching Referral and Research Hospital  
Meru Cancer Centre  
Kenyatta University Teaching Referral and Research Hospital  
Kenyatta University Teaching Referral and Research Hospital  
Mombasa Cancer Centre  
Mombasa Cancer Centre  
Kenyatta National Hospital  
Kenyatta National Hospital  
Kakamega Cancer Centre  
Meru Cancer Centre  
Meru Cancer Centre  
Kisumu Cancer Centre  
Embu Cancer Centre  
Nyeri Cancer Centre  
Nyeri Cancer Centre  
Nakuru Cancer Centre  
Nakuru Cancer Centre  
Meru Cancer Centre  
Meru Cancer Centre

Kenyatta University Teaching Referral and Research Hospital  
Machakos Cancer Centre  
Kenyatta University Teaching Referral and Research Hospital  
Kakamega Cancer Centre  
Kakamega Cancer Centre  
Nyeri Cancer Centre  
Nyeri Cancer Centre  
Mombasa Cancer Centre  
Embu Cancer Centre  
Embu Cancer Centre  
Mombasa Cancer Centre  
Kenyatta National Hospital  
Kisumu Cancer Centre  
Kenyatta National Hospital  
Nyeri Cancer Centre  
Nyeri Cancer Centre  
Kisumu Cancer Centre  
Machakos Cancer Centre  
Kenyatta National Hospital  
Kenyatta National Hospital  
Embu Cancer Centre  
Embu Cancer Centre  
Makueni Cancer Centre  
Kakamega Cancer Centre  
Machakos Cancer Centre  
Nakuru Cancer Centre  
Nakuru Cancer Centre  
Kakamega Cancer Centre  
Kenyatta University Teaching Referral and Research Hospital  
Kenyatta University Teaching Referral and Research Hospital  
Meru Cancer Centre  
Kenyatta University Teaching Referral and Research Hospital  
Kisumu Cancer Centre  
Kenyatta University Teaching Referral and Research Hospital  
Kakamega Cancer Centre  
Makueni Cancer Centre  
Mombasa Cancer Centre  
Mombasa Cancer Centre  
Nakuru Cancer Centre  
Nakuru Cancer Centre  
Machakos Cancer Centre  
Machakos Cancer Centre  
Meru Cancer Centre  
Bomet Cancer Centre  
Kenyatta National Hospital  
Kenyatta National Hospital  
Kenyatta University Teaching Referral and Research Hospital  
Kakamega Cancer Centre  
Kakamega Cancer Centre  
Machakos Cancer Centre

Machakos Cancer Centre  
Nakuru Cancer Centre  
Nakuru Cancer Centre  
Nyeri Cancer Centre  
Nyeri Cancer Centre  
Nyeri Cancer Centre  
Kisumu Cancer Centre  
Nyeri Cancer Centre  
Kenyatta National Hospital  
Kenyatta National Hospital  
Nakuru Cancer Centre  
Nakuru Cancer Centre  
Embu Cancer Centre  
Makueni Cancer Centre  
Kakamega Cancer Centre  
Makueni Cancer Centre  
Makueni Cancer Centre  
Nyeri Cancer Centre  
Nyeri Cancer Centre  
Nakuru Cancer Centre  
Nakuru Cancer Centre  
Machakos Cancer Centre  
Kenyatta National Hospital  
Kenyatta National Hospital  
Kisumu Cancer Centre  
Embu Cancer Centre  
Nakuru Cancer Centre  
Nakuru Cancer Centre  
Meru Cancer Centre  
Meru Cancer Centre  
Kisumu Cancer Centre  
Embu Cancer Centre  
Embu Cancer Centre  
Kenyatta University Teaching Referral and Research Hospital  
Makueni Cancer Centre  
Kakamega Cancer Centre  
Machakos Cancer Centre  
Machakos Cancer Centre  
Meru Cancer Centre  
Makueni Cancer Centre  
Kakamega Cancer Centre  
Meru Cancer Centre  
Kisumu Cancer Centre  
Mombasa Cancer Centre  
Mombasa Cancer Centre  
Embu Cancer Centre  
Kenyatta University Teaching Referral and Research Hospital  
Kenyatta National Hospital  
Kenyatta National Hospital  
Machakos Cancer Centre

Machakos Cancer Centre  
Kenyatta National Hospital  
Meru Cancer Centre  
Nakuru Cancer Centre  
Nakuru Cancer Centre  
Nyeri Cancer Centre  
Nyeri Cancer Centre  
Embu Cancer Centre  
Embu Cancer Centre  
Mombasa Cancer Centre  
Mombasa Cancer Centre  
Kenyatta National Hospital  
Machakos Cancer Centre  
Kakamega Cancer Centre  
Kakamega Cancer Centre  
Makueni Cancer Centre  
Makueni Cancer Centre  
Machakos Cancer Centre  
Kenyatta National Hospital  
Nakuru Cancer Centre  
Nakuru Cancer Centre  
Kenyatta National Hospital  
Makueni Cancer Centre  
Embu Cancer Centre  
Mombasa Cancer Centre  
Machakos Cancer Centre  
Embu Cancer Centre  
Meru Cancer Centre  
Nyeri Cancer Centre  
Nyeri Cancer Centre  
Kisumu Cancer Centre  
Meru Cancer Centre  
Kakamega Cancer Centre  
Nyeri Cancer Centre  
Nyeri Cancer Centre  
Meru Cancer Centre  
Meru Cancer Centre  
Kenyatta University Teaching Referral and Research Hospital  
Kenyatta University Teaching Referral and Research Hospital  
Mombasa Cancer Centre  
Kenyatta National Hospital  
Embu Cancer Centre  
Kenyatta National Hospital  
Mombasa Cancer Centre  
Mombasa Cancer Centre  
Kenyatta University Teaching Referral and Research Hospital  
Kenyatta University Teaching Referral and Research Hospital  
Bomet Cancer Centre  
Kenyatta National Hospital  
Kenyatta National Hospital

Meru Cancer Centre  
Kisumu Cancer Centre  
Meru Cancer Centre  
Nakuru Cancer Centre  
Nyeri Cancer Centre  
Nakuru Cancer Centre  
Nyeri Cancer Centre  
Kisumu Cancer Centre  
Kisumu Cancer Centre  
Nyeri Cancer Centre  
Nyeri Cancer Centre  
Machakos Cancer Centre  
Machakos Cancer Centre  
Kenyatta National Hospital  
Kenyatta National Hospital  
Mombasa Cancer Centre  
Embu Cancer Centre  
Embu Cancer Centre  
Meru Cancer Centre  
Meru Cancer Centre  
Nyeri Cancer Centre  
Nyeri Cancer Centre  
Kenyatta National Hospital  
Machakos Cancer Centre  
Machakos Cancer Centre  
Kisumu Cancer Centre  
Kenyatta National Hospital  
Kisumu Cancer Centre  
Embu Cancer Centre  
Nakuru Cancer Centre  
Nakuru Cancer Centre  
Kakamega Cancer Centre  
Kakamega Cancer Centre  
Kenyatta University Teaching Referral and Research Hospital  
Kenyatta University Teaching Referral and Research Hospital  
Nakuru Cancer Centre  
Nakuru Cancer Centre  
Kenyatta University Teaching Referral and Research Hospital  
Kakamega Cancer Centre  
Kenyatta University Teaching Referral and Research Hospital  
Kisumu Cancer Centre  
Meru Cancer Centre  
Meru Cancer Centre  
Mombasa Cancer Centre  
Kisumu Cancer Centre  
Mombasa Cancer Centre  
Machakos Cancer Centre  
Machakos Cancer Centre  
Kenyatta National Hospital  
Kenyatta University Teaching Referral and Research Hospital

Kenyatta University Teaching Referral and Research Hospital  
Kenyatta National Hospital  
Kakamega Cancer Centre  
Machakos Cancer Centre  
Machakos Cancer Centre  
Nakuru Cancer Centre  
Nyeri Cancer Centre  
Nyeri Cancer Centre  
Nakuru Cancer Centre  
Mombasa Cancer Centre  
Mombasa Cancer Centre  
Kisumu Cancer Centre  
Kenyatta National Hospital  
Nyeri Cancer Centre  
Kenyatta National Hospital  
Kisumu Cancer Centre  
Kakamega Cancer Centre  
Kakamega Cancer Centre  
Nakuru Cancer Centre  
Nakuru Cancer Centre  
Embu Cancer Centre  
Machakos Cancer Centre  
Machakos Cancer Centre  
Makueni Cancer Centre  
Nyeri Cancer Centre  
Nyeri Cancer Centre  
Nakuru Cancer Centre  
Nakuru Cancer Centre  
Machakos Cancer Centre  
Kisumu Cancer Centre  
Kakamega Cancer Centre  
Embu Cancer Centre  
Kisumu Cancer Centre  
Kenyatta National Hospital  
Kakamega Cancer Centre  
Kenyatta National Hospital  
Nakuru Cancer Centre  
Nakuru Cancer Centre  
Meru Cancer Centre  
Meru Cancer Centre  
Embu Cancer Centre  
Embu Cancer Centre  
Kisumu Cancer Centre  
Kisumu Cancer Centre  
Makueni Cancer Centre  
Mombasa Cancer Centre  
Mombasa Cancer Centre  
Kakamega Cancer Centre  
Kenyatta University Teaching Referral and Research Hospital  
Kakamega Cancer Centre

Kenyatta University Teaching Referral and Research Hospital  
Machakos Cancer Centre  
Machakos Cancer Centre  
Meru Cancer Centre  
Kakamega Cancer Centre  
Kisumu Cancer Centre  
Meru Cancer Centre  
Kisumu Cancer Centre  
Kakamega Cancer Centre  
Mombasa Cancer Centre  
Mombasa Cancer Centre  
Embu Cancer Centre  
Embu Cancer Centre  
Kenyatta National Hospital  
Machakos Cancer Centre  
Kenyatta National Hospital  
Machakos Cancer Centre  
Kenyatta University Teaching Referral and Research Hospital  
Kenyatta University Teaching Referral and Research Hospital  
Mombasa Cancer Centre  
Mombasa Cancer Centre  
Kenyatta National Hospital  
Kenyatta National Hospital  
Nakuru Cancer Centre  
Nakuru Cancer Centre  
Nyeri Cancer Centre  
Nyeri Cancer Centre  
Embu Cancer Centre  
Makueni Cancer Centre  
Kakamega Cancer Centre  
Kakamega Cancer Centre  
Machakos Cancer Centre  
Nakuru Cancer Centre  
Kakamega Cancer Centre  
Mombasa Cancer Centre  
Mombasa Cancer Centre  
Kakamega Cancer Centre  
Embu Cancer Centre  
Nakuru Cancer Centre  
Makueni Cancer Centre  
Nyeri Cancer Centre  
Kisumu Cancer Centre  
Kenyatta University Teaching Referral and Research Hospital  
Nyeri Cancer Centre  
Kenyatta University Teaching Referral and Research Hospital  
Meru Cancer Centre  
Meru Cancer Centre  
Machakos Cancer Centre  
Kenyatta National Hospital  
Kenyatta National Hospital

Kakamega Cancer Centre  
Kakamega Cancer Centre  
Makueni Cancer Centre  
Nyeri Cancer Centre  
Nyeri Cancer Centre  
Kenyatta National Hospital  
Kenyatta University Teaching Referral and Research Hospital  
Mombasa Cancer Centre  
Kenyatta National Hospital  
Meru Cancer Centre  
Kenyatta University Teaching Referral and Research Hospital  
Embu Cancer Centre  
Embu Cancer Centre  
Mombasa Cancer Centre  
Meru Cancer Centre  
Kenyatta University Teaching Referral and Research Hospital  
Kenyatta University Teaching Referral and Research Hospital  
Mombasa Cancer Centre  
Mombasa Cancer Centre  
Kenyatta National Hospital  
Kenyatta National Hospital  
Embu Cancer Centre  
Kakamega Cancer Centre  
Kisumu Cancer Centre  
Meru Cancer Centre  
Meru Cancer Centre  
Kisumu Cancer Centre  
Nyeri Cancer Centre  
Nyeri Cancer Centre  
Nakuru Cancer Centre  
Nakuru Cancer Centre  
Kisumu Cancer Centre  
Machakos Cancer Centre  
Kenyatta University Teaching Referral and Research Hospital  
Kakamega Cancer Centre  
Nyeri Cancer Centre  
Kakamega Cancer Centre  
Nyeri Cancer Centre  
Machakos Cancer Centre  
Meru Cancer Centre  
Mombasa Cancer Centre  
Mombasa Cancer Centre  
Embu Cancer Centre  
Embu Cancer Centre  
Kenyatta University Teaching Referral and Research Hospital  
Meru Cancer Centre  
Kenyatta National Hospital  
Kenyatta National Hospital  
Nyeri Cancer Centre  
Nyeri Cancer Centre

Machakos Cancer Centre  
Machakos Cancer Centre  
Kisumu Cancer Centre  
Kenyatta National Hospital  
Kenyatta National Hospital  
Embu Cancer Centre  
Embu Cancer Centre  
Nakuru Cancer Centre  
Nakuru Cancer Centre  
Kakamega Cancer Centre  
Kakamega Cancer Centre  
Kenyatta University Teaching Referral and Research Hospital  
Kenyatta University Teaching Referral and Research Hospital  
Kakamega Cancer Centre  
Kakamega Cancer Centre  
Kenyatta University Teaching Referral and Research Hospital  
Kenyatta University Teaching Referral and Research Hospital  
Makueni Cancer Centre  
Nakuru Cancer Centre  
Meru Cancer Centre  
Kisumu Cancer Centre  
Mombasa Cancer Centre  
Mombasa Cancer Centre  
Machakos Cancer Centre  
Nakuru Cancer Centre  
Machakos Cancer Centre  
Meru Cancer Centre  
Kenyatta National Hospital  
Kenyatta National Hospital  
Kenyatta University Teaching Referral and Research Hospital  
Kenyatta University Teaching Referral and Research Hospital  
Kakamega Cancer Centre  
Machakos Cancer Centre  
Machakos Cancer Centre  
Nakuru Cancer Centre  
Nakuru Cancer Centre  
Nyeri Cancer Centre  
Nyeri Cancer Centre  
Taita Taveta Cancer Centre  
Mombasa Cancer Centre  
Kisumu Cancer Centre  
Kisumu Cancer Centre  
Nyeri Cancer Centre  
Nyeri Cancer Centre  
Kenyatta National Hospital  
Kenyatta National Hospital  
Kakamega Cancer Centre  
Kakamega Cancer Centre  
Nakuru Cancer Centre  
Nakuru Cancer Centre

Makueni Cancer Centre  
Embu Cancer Centre  
Embu Cancer Centre  
Makueni Cancer Centre  
Makueni Cancer Centre  
Nyeri Cancer Centre  
Nyeri Cancer Centre  
Machakos Cancer Centre  
Nakuru Cancer Centre  
Nakuru Cancer Centre  
Machakos Cancer Centre  
Kisumu Cancer Centre  
Kisumu Cancer Centre  
Kenyatta National Hospital  
Embu Cancer Centre  
Embu Cancer Centre  
Kakamega Cancer Centre  
Kakamega Cancer Centre  
Kenyatta National Hospital  
Nakuru Cancer Centre  
Nakuru Cancer Centre  
Meru Cancer Centre  
Meru Cancer Centre  
Garissa Cancer Centre  
Bomet Cancer Centre  
Embu Cancer Centre  
Embu Cancer Centre  
Kisumu Cancer Centre  
Kenyatta University Teaching Referral and Research Hospital  
Kenyatta University Teaching Referral and Research Hospital  
Mombasa Cancer Centre  
Mombasa Cancer Centre  
Makueni Cancer Centre  
Kakamega Cancer Centre  
Kakamega Cancer Centre  
Machakos Cancer Centre  
Machakos Cancer Centre  
Kakamega Cancer Centre  
Kisumu Cancer Centre  
Meru Cancer Centre  
Kakamega Cancer Centre  
Meru Cancer Centre  
Mombasa Cancer Centre  
Mombasa Cancer Centre  
Embu Cancer Centre  
Embu Cancer Centre  
Kenyatta University Teaching Referral and Research Hospital  
Kenyatta National Hospital  
Machakos Cancer Centre  
Machakos Cancer Centre

Kenyatta National Hospital  
Kenyatta University Teaching Refferal and Research Hospital  
Kenyatta National Hospital  
Kenyatta National Hospital  
Nakuru Cancer Centre  
Nakuru Cancer Centre  
Nyeri Cancer Centre  
Nyeri Cancer Centre  
Embu Cancer Centre  
Embu Cancer Centre  
Mombasa Cancer Centre  
Mombasa Cancer Centre  
Machakos Cancer Centre  
Kakamega Cancer Centre  
Kakamega Cancer Centre  
Makueni Cancer Centre  
Makueni Cancer Centre  
Nakuru Cancer Centre  
Nakuru Cancer Centre  
Kenyatta National Hospital  
Kenyatta National Hospital  
Machakos Cancer Centre  
Embu Cancer Centre  
Mombasa Cancer Centre  
Mombasa Cancer Centre  
Embu Cancer Centre  
Kenyatta University Teaching Refferal and Research Hospital  
Kenyatta University Teaching Refferal and Research Hospital  
Kakamega Cancer Centre  
Meru Cancer Centre  
Meru Cancer Centre  
Nyeri Cancer Centre  
Nyeri Cancer Centre  
Kakamega Cancer Centre  
Nyeri Cancer Centre  
Nyeri Cancer Centre  
Kakamega Cancer Centre  
Kenyatta National Hospital  
Kenyatta National Hospital  
Meru Cancer Centre  
Meru Cancer Centre  
Bomet Cancer Centre  
Kenyatta University Teaching Refferal and Research Hospital  
Kenyatta University Teaching Refferal and Research Hospital  
Embu Cancer Centre  
Embu Cancer Centre  
Taita Taveta Cancer Centre  
Mombasa Cancer Centre  
Mombasa Cancer Centre  
Kenyatta University Teaching Refferal and Research Hospital

Mombasa Cancer Centre  
Mombasa Cancer Centre  
Kenyatta University Teaching Referral and Research Hospital  
Kenyatta National Hospital  
Bomet Cancer Centre  
Kenyatta National Hospital  
Meru Cancer Centre  
Meru Cancer Centre  
Nakuru Cancer Centre  
Nyeri Cancer Centre  
Nakuru Cancer Centre  
Nyeri Cancer Centre  
Kisumu Cancer Centre  
Kisumu Cancer Centre  
Nyeri Cancer Centre  
Nyeri Cancer Centre  
Kakamega Cancer Centre  
Machakos Cancer Centre  
Machakos Cancer Centre  
Mombasa Cancer Centre  
Kenyatta National Hospital  
Taita Taveta Cancer Centre  
Embu Cancer Centre  
Taita Taveta Cancer Centre  
Kenyatta National Hospital  
Mombasa Cancer Centre  
Embu Cancer Centre  
Kenyatta University Teaching Referral and Research Hospital  
Meru Cancer Centre  
Meru Cancer Centre  
Kenyatta University Teaching Referral and Research Hospital  
Nyeri Cancer Centre  
Kenyatta National Hospital  
Meru Cancer Centre  
Kenyatta National Hospital  
Meru Cancer Centre  
Garissa Cancer Centre  
Makueni Cancer Centre  
Taita Taveta Cancer Centre  
Makueni Cancer Centre  
Kakamega Cancer Centre  
Makueni Cancer Centre  
Makueni Cancer Centre  
Makueni Cancer Centre  
Kenyatta University Teaching Referral and Research Hospital  
Kakamega Cancer Centre  
Garissa Cancer Centre  
Nakuru Cancer Centre  
Makueni Cancer Centre  
Makueni Cancer Centre

Makueni Cancer Centre  
Machakos Cancer Centre  
Mombasa Cancer Centre  
Kenyatta University Teaching Referral and Research Hospital  
Makueni Cancer Centre  
Makueni Cancer Centre  
Makueni Cancer Centre  
Kakamega Cancer Centre  
Kakamega Cancer Centre  
Makueni Cancer Centre  
Makueni Cancer Centre  
Kenyatta National Hospital  
Taita Taveta Cancer Centre  
Nakuru Cancer Centre  
Nakuru Cancer Centre  
Taita Taveta Cancer Centre  
Mombasa Cancer Centre  
Mombasa Cancer Centre  
Meru Cancer Centre  
Nyeri Cancer Centre  
Kenyatta National Hospital  
Kenyatta National Hospital  
Meru Cancer Centre  
Embu Cancer Centre  
Nakuru Cancer Centre  
Embu Cancer Centre  
Kakamega Cancer Centre  
Makueni Cancer Centre  
Makueni Cancer Centre  
Taita Taveta Cancer Centre  
Kenyatta National Hospital  
Machakos Cancer Centre  
Machakos Cancer Centre  
Machakos Cancer Centre  
Makueni Cancer Centre  
Nakuru Cancer Centre  
Makueni Cancer Centre  
Garissa Cancer Centre  
Garissa Cancer Centre  
Kenyatta National Hospital  
Garissa Cancer Centre  
Kenyatta National Hospital  
Embu Cancer Centre  
Kenyatta National Hospital  
Kisumu Cancer Centre  
Kisumu Cancer Centre  
Machakos Cancer Centre  
Nakuru Cancer Centre  
Machakos Cancer Centre  
Embu Cancer Centre

Makueni Cancer Centre  
Mombasa Cancer Centre  
Makueni Cancer Centre  
Mombasa Cancer Centre  
Kakamega Cancer Centre  
Kakamega Cancer Centre  
Makueni Cancer Centre  
Meru Cancer Centre  
Makueni Cancer Centre  
Kakamega Cancer Centre  
Mombasa Cancer Centre  
Kisumu Cancer Centre  
Kenyatta National Hospital  
Garissa Cancer Centre  
Mombasa Cancer Centre  
Bomet Cancer Centre  
Meru Cancer Centre  
Garissa Cancer Centre  
Nakuru Cancer Centre  
Machakos Cancer Centre  
Makueni Cancer Centre  
Machakos Cancer Centre  
Makueni Cancer Centre  
Embu Cancer Centre  
Kakamega Cancer Centre  
Taita Taveta Cancer Centre  
Makueni Cancer Centre  
Makueni Cancer Centre  
Kenyatta National Hospital  
Mombasa Cancer Centre  
Kenyatta National Hospital  
Kenyatta National Hospital  
Meru Cancer Centre  
Makueni Cancer Centre  
Kakamega Cancer Centre  
Kakamega Cancer Centre  
Bomet Cancer Centre  
Bomet Cancer Centre  
Bomet Cancer Centre  
Mombasa Cancer Centre  
Taita Taveta Cancer Centre  
Kenyatta National Hospital  
Makueni Cancer Centre  
Meru Cancer Centre  
Taita Taveta Cancer Centre  
Mombasa Cancer Centre  
Meru Cancer Centre  
Makueni Cancer Centre  
Garissa Cancer Centre  
Kenyatta National Hospital

Mombasa Cancer Centre  
Bomet Cancer Centre  
Garissa Cancer Centre  
Embu Cancer Centre  
Taita Taveta Cancer Centre  
Taita Taveta Cancer Centre  
Makueni Cancer Centre  
Kakamega Cancer Centre  
Kisumu Cancer Centre  
Meru Cancer Centre  
Nakuru Cancer Centre  
Kenyatta National Hospital  
Meru Cancer Centre  
Machakos Cancer Centre  
Garissa Cancer Centre  
Garissa Cancer Centre  
Mombasa Cancer Centre  
Bomet Cancer Centre  
Kisumu Cancer Centre  
Kisumu Cancer Centre  
Bomet Cancer Centre  
Kenyatta National Hospital  
Meru Cancer Centre  
Machakos Cancer Centre  
Kenyatta National Hospital  
Kenyatta National Hospital  
Bomet Cancer Centre  
Kenyatta National Hospital  
Embu Cancer Centre  
Kakamega Cancer Centre  
Garissa Cancer Centre  
Kisumu Cancer Centre  
Kakamega Cancer Centre  
Embu Cancer Centre  
Embu Cancer Centre  
Nakuru Cancer Centre  
Embu Cancer Centre  
Meru Cancer Centre  
Kenyatta University Teaching Referral and Research Hospital  
Kisumu Cancer Centre  
Meru Cancer Centre  
Makueni Cancer Centre  
Kisumu Cancer Centre  
Kakamega Cancer Centre  
Kakamega Cancer Centre  
Kisumu Cancer Centre  
Garissa Cancer Centre  
Garissa Cancer Centre  
Garissa Cancer Centre  
Makueni Cancer Centre

Taita Taveta Cancer Centre  
Bomet Cancer Centre  
Garissa Cancer Centre  
Bomet Cancer Centre  
Mombasa Cancer Centre  
Kisumu Cancer Centre  
Garissa Cancer Centre  
Kisumu Cancer Centre  
Kenyatta National Hospital  
Bomet Cancer Centre  
Bomet Cancer Centre  
Kenyatta National Hospital  
Kenyatta University Teaching Referral and Research Hospital  
Makueni Cancer Centre  
Makueni Cancer Centre  
Makueni Cancer Centre  
Kenyatta National Hospital  
Bomet Cancer Centre  
Bomet Cancer Centre  
Bomet Cancer Centre  
Kenyatta National Hospital  
Bomet Cancer Centre  
Nyeri Cancer Centre  
Nyeri Cancer Centre  
Embu Cancer Centre  
Taita Taveta Cancer Centre  
Embu Cancer Centre  
Embu Cancer Centre  
Embu Cancer Centre  
Embu Cancer Centre  
Mombasa Cancer Centre  
Mombasa Cancer Centre  
Mombasa Cancer Centre  
Garissa Cancer Centre  
Garissa Cancer Centre  
Garissa Cancer Centre  
Meru Cancer Centre  
Kenyatta National Hospital  
Kisumu Cancer Centre  
Meru Cancer Centre  
Meru Cancer Centre  
Kisumu Cancer Centre  
Kenyatta National Hospital  
Makueni Cancer Centre  
Makueni Cancer Centre  
Kakamega Cancer Centre  
Garissa Cancer Centre  
Embu Cancer Centre  
Embu Cancer Centre  
Kakamega Cancer Centre

Garissa Cancer Centre  
Makueni Cancer Centre  
Kenyatta National Hospital  
Kenyatta National Hospital  
Machakos Cancer Centre  
Taita Taveta Cancer Centre  
Machakos Cancer Centre  
Machakos Cancer Centre  
Makueni Cancer Centre  
Makueni Cancer Centre  
Kenyatta National Hospital  
Kenyatta National Hospital  
Garissa Cancer Centre  
Embu Cancer Centre  
Kenyatta National Hospital  
Embu Cancer Centre  
Embu Cancer Centre  
Kakamega Cancer Centre  
Kakamega Cancer Centre  
Nakuru Cancer Centre  
Machakos Cancer Centre  
Machakos Cancer Centre  
Embu Cancer Centre  
Garissa Cancer Centre  
Bomet Cancer Centre  
Bomet Cancer Centre  
Kisumu Cancer Centre  
Kisumu Cancer Centre  
Meru Cancer Centre  
Garissa Cancer Centre  
Mombasa Cancer Centre  
Kenyatta University Teaching Referral and Research Hospital  
Mombasa Cancer Centre  
Kakamega Cancer Centre  
Makueni Cancer Centre  
Kakamega Cancer Centre  
Kakamega Cancer Centre  
Kisumu Cancer Centre  
Meru Cancer Centre  
Kakamega Cancer Centre  
Makueni Cancer Centre  
Kisumu Cancer Centre  
Kisumu Cancer Centre  
Embu Cancer Centre  
Embu Cancer Centre  
Bomet Cancer Centre  
Kenyatta National Hospital  
Kenyatta University Teaching Referral and Research Hospital  
Machakos Cancer Centre  
Kenyatta National Hospital

Kenyatta National Hospital  
Machakos Cancer Centre  
Garissa Cancer Centre  
Garissa Cancer Centre  
Garissa Cancer Centre  
Machakos Cancer Centre  
Garissa Cancer Centre  
Kenyatta National Hospital  
Nyeri Cancer Centre  
Taita Taveta Cancer Centre  
Taita Taveta Cancer Centre  
Embu Cancer Centre  
Kenyatta National Hospital  
Embu Cancer Centre  
Nakuru Cancer Centre  
Machakos Cancer Centre  
Kenyatta National Hospital  
Kenyatta National Hospital  
Kakamega Cancer Centre  
Kakamega Cancer Centre  
Bomet Cancer Centre  
Garissa Cancer Centre  
Makueni Cancer Centre  
Machakos Cancer Centre  
Nakuru Cancer Centre  
Taita Taveta Cancer Centre  
Taita Taveta Cancer Centre  
Embu Cancer Centre  
Embu Cancer Centre  
Embu Cancer Centre  
Kenyatta National Hospital  
Machakos Cancer Centre  
Taita Taveta Cancer Centre  
Kakamega Cancer Centre  
Machakos Cancer Centre  
Kenyatta National Hospital  
Kenyatta National Hospital  
Meru Cancer Centre  
Kisumu Cancer Centre  
Kisumu Cancer Centre  
Kisumu Cancer Centre  
Kenyatta National Hospital  
Bomet Cancer Centre  
Kenyatta University Teaching Referral and Research Hospital  
Kenyatta University Teaching Referral and Research Hospital  
Kakamega Cancer Centre  
Kakamega Cancer Centre  
Nyeri Cancer Centre  
Kakamega Cancer Centre  
Garissa Cancer Centre

Mombasa Cancer Centre  
Makueni Cancer Centre  
Kakamega Cancer Centre  
Embu Cancer Centre  
Embu Cancer Centre  
Kenyatta National Hospital  
Mombasa Cancer Centre  
Bomet Cancer Centre  
Garissa Cancer Centre  
Bomet Cancer Centre  
Kisumu Cancer Centre  
Kenyatta National Hospital  
Embu Cancer Centre  
Garissa Cancer Centre  
Kenyatta National Hospital  
Kakamega Cancer Centre  
Makueni Cancer Centre  
Kisumu Cancer Centre  
Kenyatta National Hospital  
Machakos Cancer Centre  
Makueni Cancer Centre  
Makueni Cancer Centre  
Makueni Cancer Centre  
Kakamega Cancer Centre  
Kakamega Cancer Centre  
Kakamega Cancer Centre  
Makueni Cancer Centre  
Makueni Cancer Centre  
Garissa Cancer Centre  
Taita Taveta Cancer Centre  
Mombasa Cancer Centre  
Taita Taveta Cancer Centre  
Mombasa Cancer Centre  
Kisumu Cancer Centre  
Mombasa Cancer Centre  
Kenyatta National Hospital  
Bomet Cancer Centre  
Kenyatta University Teaching Referral and Research Hospital  
Kenyatta University Teaching Referral and Research Hospital  
Bomet Cancer Centre  
Bomet Cancer Centre  
Bomet Cancer Centre  
Bomet Cancer Centre  
Machakos Cancer Centre  
Garissa Cancer Centre  
Meru Cancer Centre

Bomet Cancer Centre  
Taita Taveta Cancer Centre  
Taita Taveta Cancer Centre  
Taita Taveta Cancer Centre  
Taita Taveta Cancer Centre  
Garissa Cancer Centre  
Makueni Cancer Centre  
Nakuru Cancer Centre  
Embu Cancer Centre  
Kakamega Cancer Centre  
Meru Cancer Centre  
Kenyatta University Teaching Referral and Research Hospital  
Garissa Cancer Centre  
Kisumu Cancer Centre  
Taita Taveta Cancer Centre  
Makueni Cancer Centre  
Taita Taveta Cancer Centre  
Taita Taveta Cancer Centre  
Taita Taveta Cancer Centre  
Garissa Cancer Centre  
Kakamega Cancer Centre  
Taita Taveta Cancer Centre  
Garissa Cancer Centre  
Bomet Cancer Centre  
Bomet Cancer Centre  
Mombasa Cancer Centre  
Kisumu Cancer Centre  
Kisumu Cancer Centre  
Bomet Cancer Centre  
Kenyatta National Hospital  
Kenyatta University Teaching Referral and Research Hospital  
Bomet Cancer Centre  
Kakamega Cancer Centre  
Kakamega Cancer Centre  
Makueni Cancer Centre  
Kakamega Cancer Centre  
Bomet Cancer Centre  
Taita Taveta Cancer Centre  
Taita Taveta Cancer Centre  
Embu Cancer Centre  
Embu Cancer Centre  
Garissa Cancer Centre  
Nakuru Cancer Centre  
Embu Cancer Centre

Mombasa Cancer Centre  
Garissa Cancer Centre  
Garissa Cancer Centre  
Bomet Cancer Centre  
Nyeri Cancer Centre  
Bomet Cancer Centre  
Bomet Cancer Centre  
Kisumu Cancer Centre  
Kisumu Cancer Centre  
Kisumu Cancer Centre  
Kisumu Cancer Centre  
Meru Cancer Centre  
Meru Cancer Centre  
Nakuru Cancer Centre  
Nakuru Cancer Centre  
Embu Cancer Centre  
Nakuru Cancer Centre  
Garissa Cancer Centre  
Kakamega Cancer Centre  
Embu Cancer Centre  
Kakamega Cancer Centre  
Garissa Cancer Centre  
Kakamega Cancer Centre  
Taita Taveta Cancer Centre  
Makueni Cancer Centre  
Garissa Cancer Centre  
Kakamega Cancer Centre  
Embu Cancer Centre  
Embu Cancer Centre  
Taita Taveta Cancer Centre  
Taita Taveta Cancer Centre  
Garissa Cancer Centre  
Machakos Cancer Centre  
Taita Taveta Cancer Centre  
Taita Taveta Cancer Centre  
Taita Taveta Cancer Centre  
Taita Taveta Cancer Centre  
Machakos Cancer Centre  
Nakuru Cancer Centre  
Embu Cancer Centre  
Embu Cancer Centre  
Kakamega Cancer Centre  
Garissa Cancer Centre  
Garissa Cancer Centre  
Garissa Cancer Centre  
Kakamega Cancer Centre  
Embu Cancer Centre  
Kenyatta National Hospital  
Embu Cancer Centre  
Garissa Cancer Centre

Embu Cancer Centre  
Embu Cancer Centre  
Nakuru Cancer Centre  
Embu Cancer Centre  
Garissa Cancer Centre  
Garissa Cancer Centre  
Kisumu Cancer Centre  
Bomet Cancer Centre  
Garissa Cancer Centre  
Kisumu Cancer Centre  
Meru Cancer Centre  
Bomet Cancer Centre  
Bomet Cancer Centre  
Garissa Cancer Centre  
Taita Taveta Cancer Centre  
Taita Taveta Cancer Centre  
Taita Taveta Cancer Centre  
Garissa Cancer Centre  
Garissa Cancer Centre  
Makueni Cancer Centre  
Makueni Cancer Centre  
Kisumu Cancer Centre  
Kisumu Cancer Centre  
Meru Cancer Centre  
Meru Cancer Centre  
Kakamega Cancer Centre  
Kisumu Cancer Centre  
Makueni Cancer Centre  
Makueni Cancer Centre  
Garissa Cancer Centre  
Garissa Cancer Centre  
Garissa Cancer Centre  
Garissa Cancer Centre  
Taita Taveta Cancer Centre  
Taita Taveta Cancer Centre  
Embu Cancer Centre  
Taita Taveta Cancer Centre  
Taita Taveta Cancer Centre  
Embu Cancer Centre  
Embu Cancer Centre  
Embu Cancer Centre  
Bomet Cancer Centre  
Bomet Cancer Centre  
Kenyatta National Hospital  
Kenyatta National Hospital  
Machakos Cancer Centre  
Kenyatta National Hospital  
Bomet Cancer Centre  
Meru Cancer Centre  
Meru Cancer Centre

Bomet Cancer Centre  
Garissa Cancer Centre  
Meru Cancer Centre  
Meru Cancer Centre  
Bomet Cancer Centre  
Garissa Cancer Centre  
Meru Cancer Centre  
Bomet Cancer Centre  
Garissa Cancer Centre  
Taita Taveta Cancer Centre  
Taita Taveta Cancer Centre  
Garissa Cancer Centre  
Garissa Cancer Centre  
Embu Cancer Centre  
Taita Taveta Cancer Centre  
Embu Cancer Centre  
Makueni Cancer Centre  
Kakamega Cancer Centre  
Makueni Cancer Centre  
Kakamega Cancer Centre  
Garissa Cancer Centre  
Garissa Cancer Centre  
Garissa Cancer Centre  
Garissa Cancer Centre  
Kakamega Cancer Centre  
Taita Taveta Cancer Centre  
Makueni Cancer Centre  
Makueni Cancer Centre  
Kakamega Cancer Centre  
Kisumu Cancer Centre  
Nyeri Cancer Centre  
Kisumu Cancer Centre  
Meru Cancer Centre  
Meru Cancer Centre  
Kakamega Cancer Centre  
Kisumu Cancer Centre  
Bomet Cancer Centre  
Kisumu Cancer Centre  
Kenyatta National Hospital  
Kenyatta University Teaching Referral and Research Hospital  
Bomet Cancer Centre  
Garissa Cancer Centre  
Garissa Cancer Centre  
Bomet Cancer Centre  
Bomet Cancer Centre  
Embu Cancer Centre  
Kakamega Cancer Centre  
Makueni Cancer Centre  
Makueni Cancer Centre  
Makueni Cancer Centre

Makueni Cancer Centre  
Nyeri Cancer Centre  
Nyeri Cancer Centre  
Kenyatta University Teaching Referral and Research Hospital  
Garissa Cancer Centre  
Kenyatta National Hospital  
Garissa Cancer Centre  
Garissa Cancer Centre  
Garissa Cancer Centre  
Garissa Cancer Centre  
Bomet Cancer Centre  
Meru Cancer Centre  
Bomet Cancer Centre  
Taita Taveta Cancer Centre  
Kakamega Cancer Centre  
Kenyatta National Hospital  
Taita Taveta Cancer Centre  
Embu Cancer Centre  
Taita Taveta Cancer Centre  
Kenyatta National Hospital  
Kenyatta University Teaching Referral and Research Hospital  
Bomet Cancer Centre  
Bomet Cancer Centre  
Bomet Cancer Centre  
Garissa Cancer Centre  
Embu Cancer Centre  
Taita Taveta Cancer Centre  
Taita Taveta Cancer Centre  
Embu Cancer Centre  
Taita Taveta Cancer Centre  
Garissa Cancer Centre  
Garissa Cancer Centre  
Garissa Cancer Centre  
Makueni Cancer Centre  
Kakamega Cancer Centre  
Kakamega Cancer Centre  
Makueni Cancer Centre  
Kakamega Cancer Centre  
Kakamega Cancer Centre  
Kenyatta National Hospital  
Meru Cancer Centre  
Kenyatta National Hospital  
Kisumu Cancer Centre  
Kisumu Cancer Centre  
Kenyatta National Hospital  
Nakuru Cancer Centre  
Embu Cancer Centre  
Kenyatta National Hospital  
Kenyatta National Hospital  
Makueni Cancer Centre

Kakamega Cancer Centre  
Kakamega Cancer Centre  
Makueni Cancer Centre  
Makueni Cancer Centre  
Garissa Cancer Centre  
Garissa Cancer Centre  
Taita Taveta Cancer Centre  
Embu Cancer Centre  
Taita Taveta Cancer Centre  
Taita Taveta Cancer Centre  
Kenyatta National Hospital  
Kisumu Cancer Centre  
Bomet Cancer Centre  
Meru Cancer Centre  
Meru Cancer Centre  
Bomet Cancer Centre  
Bomet Cancer Centre  
Garissa Cancer Centre  
Bomet Cancer Centre

### Centre Type

[illegible]







[illegible]

[illegible]

[illegible]

[illegible]

[illegible]

[illegible]

[illegible]







[illegible]

[illegible]

[illegible]

[illegible]

[illegible]

[illegible]

National Cancer Centre  
National Cancer Centre  
Regional Cancer Centre  
National Cancer Centre  
Regional Cancer Centre  
National Cancer Centre  
National Cancer Centre  
Regional Cancer Centre  
Regional Cancer Centre  
Regional Cancer Centre  
National Cancer Centre  
National Cancer Centre  
National Cancer Centre  
Regional Cancer Centre  
National Cancer Centre  
National Cancer Centre  
Regional Cancer Centre  
National Cancer Centre  
National Cancer Centre  
National Cancer Centre  
National Cancer Centre  
Regional Cancer Centre  
Regional Cancer Centre  
Regional Cancer Centre

[illegible]





[illegible]

Regional Cancer Centre  
National Cancer Centre  
National Cancer Centre  
Regional Cancer Centre  
National Cancer Centre  
Regional Cancer Centre  
Regional Cancer Centre  
Regional Cancer Centre

[illegible]

[illegible]

[illegible]

[illegible]

| Sex    | Month    |
|--------|----------|
| Male   | April    |
| Female | April    |
| Male   | April    |
| Male   | August   |
| Male   | August   |
| Female | August   |
| Male   | August   |
| Female | August   |
| Female | August   |
| Male   | August   |
| Male   | August   |
| Female | August   |
| Male   | August   |
| Female | August   |
| Female | August   |
| Female | December |
| Male   | December |
| Female | December |
| Male   | February |
| Female | February |
| Female | February |
| Male   | February |
| Male   | February |
| Female | February |
| Male   | February |
| Male   | February |
| Male   | February |
| Female | February |
| Male   | February |
| Male   | February |
| Female | January  |
| Male   | January  |
| Male   | January  |
| Female | January  |
| Male   | January  |
| Female | January  |

|        |          |
|--------|----------|
| Male   | April    |
| Female | April    |
| Male   | April    |
| Male   | August   |
| Male   | August   |
| Female | August   |
| Male   | August   |
| Female | August   |
| Female | August   |
| Male   | August   |
| Male   | August   |
| Female | August   |
| Male   | August   |
| Female | August   |
| Female | August   |
| Female | December |
| Male   | December |
| Female | December |
| Male   | February |
| Female | February |
| Female | February |
| Male   | February |
| Male   | February |
| Female | February |
| Male   | February |
| Male   | February |
| Male   | February |
| Female | February |
| Male   | February |
| Male   | February |
| Female | January  |
| Male   | January  |
| Male   | January  |
| Female | January  |
| Male   | January  |
| Female | January  |

|              |        |          |
|--------------|--------|----------|
| Chemotherapy | Male   | January  |
| Chemotherapy | Male   | January  |
| Chemotherapy | Female | January  |
| Chemotherapy | Male   | January  |
| Chemotherapy | Male   | January  |
| Chemotherapy | Female | January  |
| Chemotherapy | Male   | January  |
| Chemotherapy | Male   | January  |
| Chemotherapy | Female | January  |
| Chemotherapy | Male   | January  |
| Chemotherapy | Male   | July     |
| Chemotherapy | Female | July     |
| Chemotherapy | Male   | July     |
| Chemotherapy | Female | July     |
| Chemotherapy | Male   | July     |
| Chemotherapy | Male   | July     |
| Chemotherapy | Female | July     |
| Chemotherapy | Male   | July     |
| Chemotherapy | Female | July     |
| Chemotherapy | Male   | June     |
| Chemotherapy | Male   | June     |
| Chemotherapy | Female | June     |
| Chemotherapy | Male   | June     |
| Chemotherapy | Female | June     |
| Chemotherapy | Male   | June     |
| Chemotherapy | Female | June     |
| Chemotherapy | Female | June     |
| Chemotherapy | Female | March    |
| Chemotherapy | Male   | March    |
| Chemotherapy | Female | March    |
| Chemotherapy | Male   | March    |
| Chemotherapy | Female | March    |
| Chemotherapy | Male   | May      |
| Chemotherapy | Male   | May      |
| Chemotherapy | Female | May      |
| Chemotherapy | Male   | May      |
| Chemotherapy | Female | November |
| Chemotherapy | Male   | November |
| Chemotherapy | Female | November |
| Chemotherapy | Male   | November |

|              |        |           |
|--------------|--------|-----------|
| Chemotherapy | Male   | November  |
| Chemotherapy | Male   | November  |
| Chemotherapy | Male   | November  |
| Chemotherapy | Female | November  |
| Chemotherapy | Male   | October   |
| Chemotherapy | Male   | October   |
| Chemotherapy | Female | October   |
| Chemotherapy | Male   | October   |
| Chemotherapy | Male   | October   |
| Chemotherapy | Female | October   |
| Chemotherapy | Male   | October   |
| Chemotherapy | Male   | October   |
| Chemotherapy | Female | October   |
| Chemotherapy | Male   | September |
| Chemotherapy | Female | September |
| Chemotherapy | Male   | September |
| Chemotherapy | Female | September |
| Chemotherapy | Female | September |
| Chemotherapy | Male   | September |
| Chemotherapy | Male   | September |
| Chemotherapy | Male   | April     |
| Chemotherapy | Female | April     |
| Chemotherapy | Male   | April     |
| Chemotherapy | Male   | April     |
| Chemotherapy | Female | April     |
| Chemotherapy | Male   | April     |
| Chemotherapy | Female | April     |
| Chemotherapy | Female | April     |
| Chemotherapy | Male   | April     |
| Chemotherapy | Female | August    |
| Chemotherapy | Male   | August    |
| Chemotherapy | Female | August    |
| Chemotherapy | Male   | August    |
| Chemotherapy | Female | August    |
| Chemotherapy | Female | August    |
| Chemotherapy | Male   | August    |
| Chemotherapy | Male   | August    |
| Chemotherapy | Female | December  |
| Chemotherapy | Male   | December  |
| Chemotherapy | Female | December  |
| Chemotherapy | Male   | December  |
| Chemotherapy | Male   | December  |
| Chemotherapy | Female | December  |
| Chemotherapy | Male   | February  |

|              |        |          |
|--------------|--------|----------|
| Chemotherapy | Female | February |
| Chemotherapy | Female | February |
| Chemotherapy | Male   | February |
| Chemotherapy | Male   | February |
| Chemotherapy | Male   | February |
| Chemotherapy | Female | February |
| Chemotherapy | Male   | February |
| Chemotherapy | Female | February |
| Chemotherapy | Male   | February |
| Chemotherapy | Female | February |
| Chemotherapy | Female | January  |
| Chemotherapy | Male   | January  |
| Chemotherapy | Female | January  |
| Chemotherapy | Female | January  |
| Chemotherapy | Male   | January  |
| Chemotherapy | Female | January  |
| Chemotherapy | Female | January  |
| Chemotherapy | Male   | July     |
| Chemotherapy | Female | July     |
| Chemotherapy | Female | July     |
| Chemotherapy | Male   | July     |
| Chemotherapy | Female | July     |
| Chemotherapy | Male   | July     |
| Chemotherapy | Male   | June     |
| Chemotherapy | Female | June     |
| Chemotherapy | Male   | June     |
| Chemotherapy | Female | June     |
| Chemotherapy | Female | June     |
| Chemotherapy | Male   | June     |
| Chemotherapy | Male   | June     |
| Chemotherapy | Male   | March    |
| Chemotherapy | Female | March    |
| Chemotherapy | Male   | March    |
| Chemotherapy | Male   | March    |
| Chemotherapy | Female | March    |
| Chemotherapy | Female | March    |
| Chemotherapy | Male   | March    |
| Chemotherapy | Male   | March    |
| Chemotherapy | Female | May      |
| Chemotherapy | Male   | May      |
| Chemotherapy | Female | November |

|              |        |           |
|--------------|--------|-----------|
| Chemotherapy | Female | November  |
| Chemotherapy | Female | November  |
| Chemotherapy | Male   | October   |
| Chemotherapy | Female | October   |
| Chemotherapy | Male   | October   |
| Chemotherapy | Female | October   |
| Chemotherapy | Male   | October   |
| Chemotherapy | Male   | October   |
| Chemotherapy | Male   | October   |
| Chemotherapy | Female | October   |
| Chemotherapy | Female | October   |
| Chemotherapy | Male   | October   |
| Chemotherapy | Male   | September |
| Chemotherapy | Female | September |
| Chemotherapy | Female | September |
| Chemotherapy | Male   | September |
| Chemotherapy | Female | September |
| Chemotherapy | Male   | April     |
| Chemotherapy | Male   | April     |
| Chemotherapy | Male   | April     |
| Chemotherapy | Female | April     |
| Chemotherapy | Male   | April     |
| Chemotherapy | Female | April     |
| Chemotherapy | Female | April     |
| Chemotherapy | Male   | April     |
| Chemotherapy | Male   | April     |
| Chemotherapy | Female | April     |
| Chemotherapy | Male   | April     |
| Chemotherapy | Female | April     |
| Chemotherapy | Male   | August    |
| Chemotherapy | Female | August    |
| Chemotherapy | Female | August    |
| Chemotherapy | Male   | August    |
| Chemotherapy | Female | August    |
| Chemotherapy | Male   | December  |
| Chemotherapy | Female | December  |
| Chemotherapy | Male   | December  |
| Chemotherapy | Female | December  |

|              |        |          |
|--------------|--------|----------|
| Chemotherapy | Male   | December |
| Chemotherapy | Male   | December |
| Chemotherapy | Male   | December |
| Chemotherapy | Female | December |
| Chemotherapy | Female | December |
| Chemotherapy | Male   | December |
| Chemotherapy | Female | February |
| Chemotherapy | Male   | February |
| Chemotherapy | Female | February |
| Chemotherapy | Male   | February |
| Chemotherapy | Female | February |
| Chemotherapy | Female | February |
| Chemotherapy | Male   | January  |
| Chemotherapy | Female | January  |
| Chemotherapy | Male   | January  |
| Chemotherapy | Female | January  |
| Chemotherapy | Male   | January  |
| Chemotherapy | Male   | January  |
| Chemotherapy | Female | January  |
| Chemotherapy | Male   | January  |
| Chemotherapy | Male   | January  |
| Chemotherapy | Female | January  |
| Chemotherapy | Male   | January  |
| Chemotherapy | Female | January  |
| Chemotherapy | Female | July     |
| Chemotherapy | Male   | July     |
| Chemotherapy | Female | July     |
| Chemotherapy | Male   | July     |
| Chemotherapy | Female | June     |
| Chemotherapy | Female | June     |
| Chemotherapy | Male   | June     |
| Chemotherapy | Female | June     |
| Chemotherapy | Male   | June     |
| Chemotherapy | Male   | June     |
| Chemotherapy | Female | June     |
| Chemotherapy | Male   | March    |
| Chemotherapy | Female | March    |
| Chemotherapy | Male   | March    |
| Chemotherapy | Male   | March    |

|              |        |           |
|--------------|--------|-----------|
| Chemotherapy | Male   | March     |
| Chemotherapy | Male   | March     |
| Chemotherapy | Female | March     |
| Chemotherapy | Female | March     |
| Chemotherapy | Male   | March     |
| Chemotherapy | Female | March     |
| Chemotherapy | Male   | March     |
| Chemotherapy | Female | May       |
| Chemotherapy | Male   | May       |
| Chemotherapy | Female | May       |
| Chemotherapy | Female | May       |
| Chemotherapy | Male   | May       |
| Chemotherapy | Male   | May       |
| Chemotherapy | Female | November  |
| Chemotherapy | Male   | November  |
| Chemotherapy | Male   | November  |
| Chemotherapy | Female | November  |
| Chemotherapy | Male   | November  |
| Chemotherapy | Female | November  |
| Chemotherapy | Male   | November  |
| Chemotherapy | Male   | October   |
| Chemotherapy | Male   | October   |
| Chemotherapy | Female | October   |
| Chemotherapy | Male   | October   |
| Chemotherapy | Male   | October   |
| Chemotherapy | Female | October   |
| Chemotherapy | Male   | October   |
| Chemotherapy | Female | October   |
| Chemotherapy | Female | October   |
| Chemotherapy | Male   | October   |
| Chemotherapy | Male   | September |
| Chemotherapy | Male   | September |
| Chemotherapy | Male   | September |
| Chemotherapy | Female | September |
| Chemotherapy | Male   | September |
| Chemotherapy | Male   | September |
| Chemotherapy | Female | September |
| Chemotherapy | Male   | September |
| Chemotherapy | Male   | September |
| Chemotherapy | Male   | April     |
| Chemotherapy | Female | April     |
| Chemotherapy | Female | April     |
| Chemotherapy | Female | April     |
| Chemotherapy | Male   | April     |
| Chemotherapy | Female | April     |
| Chemotherapy | Male   | April     |
| Chemotherapy | Female | April     |
| Chemotherapy | Male   | April     |
| Chemotherapy | Male   | August    |
| Chemotherapy | Female | August    |

|              |        |          |
|--------------|--------|----------|
| Chemotherapy | Female | August   |
| Chemotherapy | Female | August   |
| Chemotherapy | Female | August   |
| Chemotherapy | Male   | August   |
| Chemotherapy | Male   | August   |
| Chemotherapy | Female | August   |
| Chemotherapy | Female | August   |
| Chemotherapy | Male   | December |
| Chemotherapy | Female | December |
| Chemotherapy | Male   | December |
| Chemotherapy | Female | December |
| Chemotherapy | Male   | December |
| Chemotherapy | Female | December |
| Chemotherapy | Female | December |
| Chemotherapy | Female | December |
| Chemotherapy | Male   | December |
| Chemotherapy | Male   | December |
| Chemotherapy | Male   | February |
| Chemotherapy | Male   | February |
| Chemotherapy | Female | February |
| Chemotherapy | Male   | February |
| Chemotherapy | Female | February |
| Chemotherapy | Male   | February |
| Chemotherapy | Male   | February |
| Chemotherapy | Female | February |
| Chemotherapy | Male   | February |
| Chemotherapy | Male   | January  |
| Chemotherapy | Female | January  |
| Chemotherapy | Female | January  |
| Chemotherapy | Male   | January  |
| Chemotherapy | Male   | January  |
| Chemotherapy | Female | January  |
| Chemotherapy | Male   | January  |
| Chemotherapy | Female | January  |
| Chemotherapy | Male   | January  |
| Chemotherapy | Female | January  |
| Chemotherapy | Male   | January  |
| Chemotherapy | Female | January  |
| Chemotherapy | Male   | January  |
| Chemotherapy | Male   | January  |
| Chemotherapy | Female | January  |
| Chemotherapy | Male   | January  |
| Chemotherapy | Male   | July     |
| Chemotherapy | Male   | July     |
| Chemotherapy | Male   | July     |
| Chemotherapy | Female | July     |
| Chemotherapy | Female | July     |
| Chemotherapy | Male   | July     |
| Chemotherapy | Female | July     |
| Chemotherapy | Female | July     |

|              |        |           |
|--------------|--------|-----------|
| Chemotherapy | Male   | June      |
| Chemotherapy | Male   | June      |
| Chemotherapy | Female | June      |
| Chemotherapy | Female | June      |
| Chemotherapy | Female | June      |
| Chemotherapy | Male   | June      |
| Chemotherapy | Male   | June      |
| Chemotherapy | Female | June      |
| Chemotherapy | Male   | June      |
| Chemotherapy | Female | March     |
| Chemotherapy | Male   | March     |
| Chemotherapy | Female | March     |
| Chemotherapy | Female | March     |
| Chemotherapy | Female | March     |
| Chemotherapy | Male   | March     |
| Chemotherapy | Female | March     |
| Chemotherapy | Female | March     |
| Chemotherapy | Male   | March     |
| Chemotherapy | Female | May       |
| Chemotherapy | Male   | May       |
| Chemotherapy | Female | May       |
| Chemotherapy | Female | May       |
| Chemotherapy | Male   | May       |
| Chemotherapy | Female | November  |
| Chemotherapy | Male   | November  |
| Chemotherapy | Female | November  |
| Chemotherapy | Female | November  |
| Chemotherapy | Male   | November  |
| Chemotherapy | Male   | November  |
| Chemotherapy | Female | November  |
| Chemotherapy | Male   | November  |
| Chemotherapy | Female | November  |
| Chemotherapy | Female | November  |
| Chemotherapy | Female | November  |
| Chemotherapy | Male   | November  |
| Chemotherapy | Female | October   |
| Chemotherapy | Male   | October   |
| Chemotherapy | Female | October   |
| Chemotherapy | Female | October   |
| Chemotherapy | Female | October   |
| Chemotherapy | Male   | October   |
| Chemotherapy | Female | October   |
| Chemotherapy | Female | October   |
| Chemotherapy | Female | October   |
| Chemotherapy | Male   | October   |
| Chemotherapy | Male   | September |
| Chemotherapy | Female | September |

|              |        |           |
|--------------|--------|-----------|
| Chemotherapy | Female | September |
| Chemotherapy | Male   | September |
| Chemotherapy | Male   | September |
| Chemotherapy | Female | September |
| Chemotherapy | Female | September |
| Chemotherapy | Male   | September |
| Chemotherapy | Male   | April     |
| Chemotherapy | Female | April     |
| Chemotherapy | Male   | April     |
| Chemotherapy | Female | August    |
| Chemotherapy | Male   | August    |
| Chemotherapy | Male   | August    |
| Chemotherapy | Female | August    |
| Chemotherapy | Female | August    |
| Chemotherapy | Male   | August    |
| Chemotherapy | Male   | August    |
| Chemotherapy | Female | August    |
| Chemotherapy | Male   | August    |
| Chemotherapy | Female | August    |
| Chemotherapy | Female | December  |
| Chemotherapy | Female | December  |
| Chemotherapy | Male   | December  |
| Chemotherapy | Male   | December  |
| Chemotherapy | Female | December  |
| Chemotherapy | Female | December  |
| Chemotherapy | Female | December  |
| Chemotherapy | Male   | December  |
| Chemotherapy | Male   | February  |
| Chemotherapy | Female | February  |
| Chemotherapy | Female | February  |
| Chemotherapy | Male   | February  |
| Chemotherapy | Male   | February  |
| Chemotherapy | Female | February  |
| Chemotherapy | Female | February  |
| Chemotherapy | Female | February  |
| Chemotherapy | Male   | February  |
| Chemotherapy | Female | February  |
| Chemotherapy | Female | February  |
| Chemotherapy | Male   | February  |
| Chemotherapy | Female | January   |
| Chemotherapy | Male   | January   |
| Chemotherapy | Male   | January   |
| Chemotherapy | Female | January   |
| Chemotherapy | Male   | January   |
| Chemotherapy | Female | January   |
| Chemotherapy | Male   | January   |
| Chemotherapy | Female | January   |

|              |        |          |
|--------------|--------|----------|
| Chemotherapy | Male   | January  |
| Chemotherapy | Female | January  |
| Chemotherapy | Female | January  |
| Chemotherapy | Male   | January  |
| Chemotherapy | Male   | July     |
| Chemotherapy | Female | July     |
| Chemotherapy | Female | July     |
| Chemotherapy | Male   | July     |
| Chemotherapy | Male   | July     |
| Chemotherapy | Female | July     |
| Chemotherapy | Male   | July     |
| Chemotherapy | Male   | June     |
| Chemotherapy | Female | June     |
| Chemotherapy | Male   | June     |
| Chemotherapy | Female | June     |
| Chemotherapy | Male   | June     |
| Chemotherapy | Female | June     |
| Chemotherapy | Male   | June     |
| Chemotherapy | Male   | June     |
| Chemotherapy | Female | June     |
| Chemotherapy | Male   | June     |
| Chemotherapy | Female | June     |
| Chemotherapy | Female | March    |
| Chemotherapy | Female | March    |
| Chemotherapy | Female | March    |
| Chemotherapy | Male   | March    |
| Chemotherapy | Female | March    |
| Chemotherapy | Male   | March    |
| Chemotherapy | Female | March    |
| Chemotherapy | Male   | March    |
| Chemotherapy | Male   | March    |
| Chemotherapy | Female | March    |
| Chemotherapy | Female | May      |
| Chemotherapy | Female | May      |
| Chemotherapy | Male   | May      |
| Chemotherapy | Female | May      |
| Chemotherapy | Female | May      |
| Chemotherapy | Male   | May      |
| Chemotherapy | Female | November |
| Chemotherapy | Male   | November |
| Chemotherapy | Male   | November |
| Chemotherapy | Female | November |
| Chemotherapy | Male   | November |
| Chemotherapy | Female | November |
| Chemotherapy | Male   | November |
| Chemotherapy | Female | November |
| Chemotherapy | Female | October  |
| Chemotherapy | Female | October  |
| Chemotherapy | Male   | October  |
| Chemotherapy | Female | October  |

|              |        |           |
|--------------|--------|-----------|
| Chemotherapy | Male   | October   |
| Chemotherapy | Female | October   |
| Chemotherapy | Female | September |
| Chemotherapy | Male   | September |
| Chemotherapy | Female | September |
| Chemotherapy | Female | September |
| Chemotherapy | Male   | April     |
| Chemotherapy | Female | April     |
| Chemotherapy | Male   | April     |
| Chemotherapy | Female | April     |
| Chemotherapy | Male   | April     |
| Chemotherapy | Male   | August    |
| Chemotherapy | Male   | August    |
| Chemotherapy | Female | August    |
| Chemotherapy | Male   | August    |
| Chemotherapy | Male   | August    |
| Chemotherapy | Female | August    |
| Chemotherapy | Female | August    |
| Chemotherapy | Male   | August    |
| Chemotherapy | Female | December  |
| Chemotherapy | Male   | December  |
| Chemotherapy | Female | December  |
| Chemotherapy | Male   | December  |
| Chemotherapy | Male   | December  |
| Chemotherapy | Female | December  |
| Chemotherapy | Male   | December  |
| Chemotherapy | Female | December  |
| Chemotherapy | Male   | February  |
| Chemotherapy | Male   | February  |
| Chemotherapy | Female | February  |
| Chemotherapy | Male   | February  |
| Chemotherapy | Female | February  |
| Chemotherapy | Female | February  |
| Chemotherapy | Female | February  |
| Chemotherapy | Male   | January   |
| Chemotherapy | Female | January   |
| Chemotherapy | Female | January   |
| Chemotherapy | Male   | January   |
| Chemotherapy | Female | January   |
| Chemotherapy | Male   | January   |
| Chemotherapy | Female | January   |
| Chemotherapy | Female | January   |
| Chemotherapy | Male   | January   |
| Chemotherapy | Male   | July      |
| Chemotherapy | Female | July      |
| Chemotherapy | Female | July      |
| Chemotherapy | Female | July      |
| Chemotherapy | Male   | July      |
| Chemotherapy | Female | July      |
| Chemotherapy | Male   | July      |

|              |        |           |
|--------------|--------|-----------|
| Chemotherapy | Female | June      |
| Chemotherapy | Male   | June      |
| Chemotherapy | Female | June      |
| Chemotherapy | Female | June      |
| Chemotherapy | Male   | June      |
| Chemotherapy | Male   | June      |
| Chemotherapy | Male   | June      |
| Chemotherapy | Female | March     |
| Chemotherapy | Male   | March     |
| Chemotherapy | Male   | March     |
| Chemotherapy | Female | March     |
| Chemotherapy | Male   | March     |
| Chemotherapy | Male   | March     |
| Chemotherapy | Female | March     |
| Chemotherapy | Male   | March     |
| Chemotherapy | Female | March     |
| Chemotherapy | Male   | March     |
| Chemotherapy | Male   | May       |
| Chemotherapy | Female | November  |
| Chemotherapy | Male   | November  |
| Chemotherapy | Female | November  |
| Chemotherapy | Male   | November  |
| Chemotherapy | Female | November  |
| Chemotherapy | Male   | November  |
| Chemotherapy | Male   | November  |
| Chemotherapy | Female | November  |
| Chemotherapy | Male   | October   |
| Chemotherapy | Male   | October   |
| Chemotherapy | Female | October   |
| Chemotherapy | Male   | October   |
| Chemotherapy | Female | October   |
| Chemotherapy | Female | September |
| Chemotherapy | Female | September |
| Chemotherapy | Male   | September |
| Chemotherapy | Male   | September |
| Chemotherapy | Male   | September |
| Chemotherapy | Female | September |
| Chemotherapy | Male   | September |
| Chemotherapy | Male   | April     |
| Chemotherapy | Male   | April     |
| Chemotherapy | Female | April     |
| Chemotherapy | Male   | April     |
| Chemotherapy | Female | April     |
| Chemotherapy | Male   | August    |
| Chemotherapy | Female | August    |
| Chemotherapy | Male   | August    |
| Chemotherapy | Male   | August    |
| Chemotherapy | Female | August    |
| Chemotherapy | Male   | August    |
| Chemotherapy | Female | August    |

|              |        |          |
|--------------|--------|----------|
| Chemotherapy | Male   | August   |
| Chemotherapy | Female | December |
| Chemotherapy | Female | December |
| Chemotherapy | Male   | December |
| Chemotherapy | Male   | December |
| Chemotherapy | Female | December |
| Chemotherapy | Male   | February |
| Chemotherapy | Female | February |
| Chemotherapy | Male   | February |
| Chemotherapy | Female | February |
| Chemotherapy | Female | February |
| Chemotherapy | Female | February |
| Chemotherapy | Male   | February |
| Chemotherapy | Female | February |
| Chemotherapy | Male   | January  |
| Chemotherapy | Male   | January  |
| Chemotherapy | Female | January  |
| Chemotherapy | Male   | January  |
| Chemotherapy | Male   | January  |
| Chemotherapy | Female | January  |
| Chemotherapy | Female | January  |
| Chemotherapy | Female | January  |
| Chemotherapy | Male   | January  |
| Chemotherapy | Male   | July     |
| Chemotherapy | Female | July     |
| Chemotherapy | Male   | July     |
| Chemotherapy | Female | July     |
| Chemotherapy | Female | June     |
| Chemotherapy | Male   | June     |
| Chemotherapy | Male   | June     |
| Chemotherapy | Female | June     |
| Chemotherapy | Male   | June     |
| Chemotherapy | Female | June     |
| Chemotherapy | Female | June     |
| Chemotherapy | Male   | March    |
| Chemotherapy | Female | March    |
| Chemotherapy | Male   | March    |
| Chemotherapy | Female | March    |
| Chemotherapy | Male   | March    |
| Chemotherapy | Female | May      |
| Chemotherapy | Male   | May      |
| Chemotherapy | Female | November |
| Chemotherapy | Male   | November |
| Chemotherapy | Male   | November |
| Chemotherapy | Female | November |
| Chemotherapy | Female | November |
| Chemotherapy | Male   | November |

|              |        |           |
|--------------|--------|-----------|
| Chemotherapy | Female | October   |
| Chemotherapy | Male   | October   |
| Chemotherapy | Female | October   |
| Chemotherapy | Female | October   |
| Chemotherapy | Male   | October   |
| Chemotherapy | Female | October   |
| Chemotherapy | Male   | September |
| Chemotherapy | Male   | September |
| Chemotherapy | Female | September |
| Chemotherapy | Male   | April     |
| Chemotherapy | Male   | April     |
| Chemotherapy | Male   | April     |
| Chemotherapy | Female | April     |
| Chemotherapy | Male   | April     |
| Chemotherapy | Female | August    |
| Chemotherapy | Female | August    |
| Chemotherapy | Male   | August    |
| Chemotherapy | Male   | August    |
| Chemotherapy | Female | August    |
| Chemotherapy | Female | August    |
| Chemotherapy | Male   | August    |
| Chemotherapy | Male   | December  |
| Chemotherapy | Male   | December  |
| Chemotherapy | Female | December  |
| Chemotherapy | Female | December  |
| Chemotherapy | Male   | February  |
| Chemotherapy | Female | February  |
| Chemotherapy | Male   | February  |
| Chemotherapy | Female | February  |
| Chemotherapy | Female | February  |
| Chemotherapy | Male   | February  |
| Chemotherapy | Male   | February  |
| Chemotherapy | Male   | February  |
| Chemotherapy | Female | January   |
| Chemotherapy | Male   | January   |
| Chemotherapy | Male   | January   |
| Chemotherapy | Female | January   |
| Chemotherapy | Female | January   |
| Chemotherapy | Male   | January   |
| Chemotherapy | Male   | January   |
| Chemotherapy | Female | January   |
| Chemotherapy | Male   | January   |
| Chemotherapy | Male   | July      |
| Chemotherapy | Female | July      |
| Chemotherapy | Male   | July      |
| Chemotherapy | Male   | July      |
| Chemotherapy | Male   | July      |
| Chemotherapy | Female | July      |
| Chemotherapy | Male   | June      |
| Chemotherapy | Female | June      |

|                                |        |           |
|--------------------------------|--------|-----------|
| Chemotherapy                   | Male   | June      |
| Chemotherapy                   | Male   | June      |
| Chemotherapy                   | Male   | June      |
| Chemotherapy                   | Female | June      |
| Chemotherapy                   | Female | June      |
| Chemotherapy                   | Male   | June      |
| Chemotherapy                   | Male   | March     |
| Chemotherapy                   | Male   | March     |
| Chemotherapy                   | Female | March     |
| Chemotherapy                   | Male   | March     |
| Chemotherapy                   | Male   | March     |
| Chemotherapy                   | Female | March     |
| Chemotherapy                   | Male   | May       |
| Chemotherapy                   | Male   | May       |
| Chemotherapy                   | Male   | May       |
| Chemotherapy                   | Female | November  |
| Chemotherapy                   | Male   | November  |
| Chemotherapy                   | Female | November  |
| Chemotherapy                   | Female | November  |
| Chemotherapy                   | Female | November  |
| Chemotherapy                   | Male   | October   |
| Chemotherapy                   | Female | October   |
| Chemotherapy                   | Male   | October   |
| Chemotherapy                   | Female | October   |
| Chemotherapy                   | Male   | September |
| Chemotherapy                   | Male   | September |
| Chemotherapy                   | Female | September |
| Hormonal or Targeted therapies | Male   | April     |
| Hormonal or Targeted therapies | Male   | August    |
| Hormonal or Targeted therapies | Male   | December  |
| Hormonal or Targeted therapies | Male   | February  |
| Hormonal or Targeted therapies | Male   | January   |
| Hormonal or Targeted therapies | Male   | July      |
| Hormonal or Targeted therapies | Male   | June      |
| Hormonal or Targeted therapies | Male   | March     |
| Hormonal or Targeted therapies | Male   | May       |
| Hormonal or Targeted therapies | Male   | November  |
| Hormonal or Targeted therapies | Male   | September |
| Hormonal or Targeted therapies | Female | April     |
| Hormonal or Targeted therapies | Female | April     |
| Hormonal or Targeted therapies | Male   | April     |
| Hormonal or Targeted therapies | Male   | April     |
| Hormonal or Targeted therapies | Female | April     |
| Hormonal or Targeted therapies | Female | April     |
| Hormonal or Targeted therapies | Male   | April     |
| Hormonal or Targeted therapies | Male   | April     |
| Hormonal or Targeted therapies | Female | April     |

[illegible]

|                                |        |           |
|--------------------------------|--------|-----------|
| Hormonal or Targeted therapies | Female | May       |
| Hormonal or Targeted therapies | Male   | November  |
| Hormonal or Targeted therapies | Male   | November  |
| Hormonal or Targeted therapies | Female | November  |
| Hormonal or Targeted therapies | Female | November  |
| Hormonal or Targeted therapies | Female | November  |
| Hormonal or Targeted therapies | Male   | November  |
| Hormonal or Targeted therapies | Male   | November  |
| Hormonal or Targeted therapies | Female | November  |
| Hormonal or Targeted therapies | Female | November  |
| Hormonal or Targeted therapies | Female | October   |
| Hormonal or Targeted therapies | Male   | October   |
| Hormonal or Targeted therapies | Female | October   |
| Hormonal or Targeted therapies | Female | October   |
| Hormonal or Targeted therapies | Male   | October   |
| Hormonal or Targeted therapies | Male   | September |
| Hormonal or Targeted therapies | Female | September |
| Hormonal or Targeted therapies | Female | September |
| Hormonal or Targeted therapies | Female | September |
| Hormonal or Targeted therapies | Male   | April     |
| Hormonal or Targeted therapies | Male   | April     |
| Hormonal or Targeted therapies | Female | April     |
| Hormonal or Targeted therapies | Male   | April     |
| Hormonal or Targeted therapies | Male   | April     |
| Hormonal or Targeted therapies | Female | April     |
| Hormonal or Targeted therapies | Female | April     |
| Hormonal or Targeted therapies | Male   | April     |
| Hormonal or Targeted therapies | Female | August    |
| Hormonal or Targeted therapies | Male   | August    |
| Hormonal or Targeted therapies | Female | August    |
| Hormonal or Targeted therapies | Male   | August    |
| Hormonal or Targeted therapies | Male   | August    |
| Hormonal or Targeted therapies | Male   | August    |
| Hormonal or Targeted therapies | Male   | August    |
| Hormonal or Targeted therapies | Female | August    |
| Hormonal or Targeted therapies | Female | December  |
| Hormonal or Targeted therapies | Male   | December  |
| Hormonal or Targeted therapies | Male   | December  |
| Hormonal or Targeted therapies | Male   | December  |
| Hormonal or Targeted therapies | Female | December  |
| Hormonal or Targeted therapies | Male   | December  |
| Hormonal or Targeted therapies | Male   | December  |
| Hormonal or Targeted therapies | Female | December  |
| Hormonal or Targeted therapies | Female | December  |
| Hormonal or Targeted therapies | Female | February  |
| Hormonal or Targeted therapies | Male   | February  |
| Hormonal or Targeted therapies | Female | February  |
| Hormonal or Targeted therapies | Female | February  |
| Hormonal or Targeted therapies | Male   | February  |

|                                |        |          |
|--------------------------------|--------|----------|
| Hormonal or Targeted therapies | Male   | February |
| Hormonal or Targeted therapies | Female | February |
| Hormonal or Targeted therapies | Male   | January  |
| Hormonal or Targeted therapies | Male   | January  |
| Hormonal or Targeted therapies | Male   | January  |
| Hormonal or Targeted therapies | Female | January  |
| Hormonal or Targeted therapies | Female | January  |
| Hormonal or Targeted therapies | Male   | January  |
| Hormonal or Targeted therapies | Female | January  |
| Hormonal or Targeted therapies | Male   | January  |
| Hormonal or Targeted therapies | Male   | July     |
| Hormonal or Targeted therapies | Female | July     |
| Hormonal or Targeted therapies | Female | July     |
| Hormonal or Targeted therapies | Male   | July     |
| Hormonal or Targeted therapies | Female | July     |
| Hormonal or Targeted therapies | Male   | July     |
| Hormonal or Targeted therapies | Male   | July     |
| Hormonal or Targeted therapies | Male   | July     |
| Hormonal or Targeted therapies | Female | July     |
| Hormonal or Targeted therapies | Female | June     |
| Hormonal or Targeted therapies | Male   | June     |
| Hormonal or Targeted therapies | Female | June     |
| Hormonal or Targeted therapies | Female | June     |
| Hormonal or Targeted therapies | Male   | June     |
| Hormonal or Targeted therapies | Male   | June     |
| Hormonal or Targeted therapies | Male   | June     |
| Hormonal or Targeted therapies | Male   | March    |
| Hormonal or Targeted therapies | Female | March    |
| Hormonal or Targeted therapies | Female | March    |
| Hormonal or Targeted therapies | Male   | March    |
| Hormonal or Targeted therapies | Male   | March    |
| Hormonal or Targeted therapies | Female | March    |
| Hormonal or Targeted therapies | Male   | March    |
| Hormonal or Targeted therapies | Female | March    |
| Hormonal or Targeted therapies | Male   | March    |
| Hormonal or Targeted therapies | Male   | May      |
| Hormonal or Targeted therapies | Male   | May      |
| Hormonal or Targeted therapies | Male   | May      |
| Hormonal or Targeted therapies | Female | May      |
| Hormonal or Targeted therapies | Female | May      |
| Hormonal or Targeted therapies | Male   | November |
| Hormonal or Targeted therapies | Male   | November |
| Hormonal or Targeted therapies | Male   | November |
| Hormonal or Targeted therapies | Female | November |
| Hormonal or Targeted therapies | Male   | November |
| Hormonal or Targeted therapies | Female | November |
| Hormonal or Targeted therapies | Male   | November |
| Hormonal or Targeted therapies | Male   | October  |
| Hormonal or Targeted therapies | Female | October  |
| Hormonal or Targeted therapies | Male   | October  |

[illegible]

[illegible]

[illegible]

[illegible]

[illegible]

[illegible]

[illegible]

[illegible]

[illegible]

|                                |        |           |
|--------------------------------|--------|-----------|
| Hormonal or Targeted therapies | Male   | October   |
| Hormonal or Targeted therapies | Female | October   |
| Hormonal or Targeted therapies | Female | October   |
| Hormonal or Targeted therapies | Male   | October   |
| Hormonal or Targeted therapies | Female | October   |
| Hormonal or Targeted therapies | Male   | October   |
| Hormonal or Targeted therapies | Male   | October   |
| Hormonal or Targeted therapies | Female | October   |
| Hormonal or Targeted therapies | Female | September |
| Hormonal or Targeted therapies | Male   | September |
| Hormonal or Targeted therapies | Female | September |
| Hormonal or Targeted therapies | Male   | September |
| Hormonal or Targeted therapies | Female | September |
| Hormonal or Targeted therapies | Female | September |
| Hormonal or Targeted therapies | Male   | September |
| Hormonal or Targeted therapies | Male   | September |
| Hormonal or Targeted therapies | Male   | September |
| Hormonal or Targeted therapies | Female | September |
| Hormonal or Targeted therapies | Male   | September |
| Hormonal or Targeted therapies | Female | September |
| Surgery                        | Female | April     |
| Surgery                        | Female | April     |
| Surgery                        | Male   | April     |
| Surgery                        | Female | April     |
| Surgery                        | Male   | April     |
| Surgery                        | Male   | April     |
| Surgery                        | Female | April     |
| Surgery                        | Male   | April     |
| Surgery                        | Male   | April     |
| Surgery                        | Female | April     |
| Surgery                        | Male   | April     |
| Surgery                        | Female | April     |
| Surgery                        | Female | April     |
| Surgery                        | Male   | April     |
| Surgery                        | Female | April     |
| Surgery                        | Male   | April     |
| Surgery                        | Female | April     |
| Surgery                        | Female | April     |
| Surgery                        | Male   | April     |
| Surgery                        | Female | August    |
| Surgery                        | Male   | August    |
| Surgery                        | Female | August    |
| Surgery                        | Male   | August    |
| Surgery                        | Male   | December  |
| Surgery                        | Female | December  |
| Surgery                        | Female | December  |
| Surgery                        | Male   | December  |
| Surgery                        | Male   | December  |
| Surgery                        | Male   | February  |
| Surgery                        | Male   | February  |

|         |        |          |
|---------|--------|----------|
| Surgery | Female | February |
| Surgery | Female | February |
| Surgery | Male   | February |
| Surgery | Female | February |
| Surgery | Male   | February |
| Surgery | Male   | February |
| Surgery | Female | February |
| Surgery | Male   | February |
| Surgery | Female | February |
| Surgery | Male   | February |
| Surgery | Female | February |
| Surgery | Female | February |
| Surgery | Male   | February |
| Surgery | Female | February |
| Surgery | Female | February |
| Surgery | Male   | February |
| Surgery | Male   | February |
| Surgery | Female | February |
| Surgery | Female | January  |
| Surgery | Male   | January  |
| Surgery | Female | January  |
| Surgery | Male   | January  |
| Surgery | Male   | January  |
| Surgery | Female | January  |
| Surgery | Male   | January  |
| Surgery | Male   | January  |
| Surgery | Female | January  |
| Surgery | Female | January  |
| Surgery | Male   | January  |
| Surgery | Male   | January  |
| Surgery | Female | January  |
| Surgery | Female | January  |
| Surgery | Female | January  |
| Surgery | Male   | January  |
| Surgery | Male   | January  |
| Surgery | Female | January  |
| Surgery | Female | January  |
| Surgery | Female | January  |
| Surgery | Male   | January  |
| Surgery | Male   | July     |
| Surgery | Male   | July     |
| Surgery | Male   | July     |
| Surgery | Female | July     |
| Surgery | Female | July     |
| Surgery | Female | June     |
| Surgery | Female | June     |
| Surgery | Male   | June     |
| Surgery | Male   | June     |
| Surgery | Female | June     |
| Surgery | Male   | June     |
| Surgery | Male   | March    |

|         |        |           |
|---------|--------|-----------|
| Surgery | Male   | March     |
| Surgery | Male   | March     |
| Surgery | Female | March     |
| Surgery | Female | March     |
| Surgery | Male   | May       |
| Surgery | Female | May       |
| Surgery | Male   | May       |
| Surgery | Female | May       |
| Surgery | Female | November  |
| Surgery | Female | November  |
| Surgery | Male   | November  |
| Surgery | Female | November  |
| Surgery | Female | November  |
| Surgery | Male   | November  |
| Surgery | Female | November  |
| Surgery | Male   | November  |
| Surgery | Male   | October   |
| Surgery | Female | October   |
| Surgery | Female | October   |
| Surgery | Male   | October   |
| Surgery | Male   | September |
| Surgery | Female | April     |
| Surgery | Female | April     |
| Surgery | Female | April     |
| Surgery | Male   | April     |
| Surgery | Female | April     |
| Surgery | Male   | April     |
| Surgery | Female | August    |
| Surgery | Female | August    |
| Surgery | Male   | August    |
| Surgery | Female | August    |
| Surgery | Male   | August    |
| Surgery | Female | August    |
| Surgery | Female | December  |
| Surgery | Female | December  |
| Surgery | Male   | December  |
| Surgery | Male   | December  |
| Surgery | Female | December  |
| Surgery | Female | December  |
| Surgery | Female | February  |
| Surgery | Male   | February  |
| Surgery | Male   | February  |
| Surgery | Female | January   |
| Surgery | Male   | January   |
| Surgery | Male   | January   |
| Surgery | Female | January   |
| Surgery | Female | January   |

|         |        |           |
|---------|--------|-----------|
| Surgery | Female | January   |
| Surgery | Female | July      |
| Surgery | Male   | July      |
| Surgery | Female | July      |
| Surgery | Female | July      |
| Surgery | Male   | July      |
| Surgery | Male   | June      |
| Surgery | Female | June      |
| Surgery | Female | June      |
| Surgery | Female | June      |
| Surgery | Male   | June      |
| Surgery | Female | June      |
| Surgery | Female | March     |
| Surgery | Female | May       |
| Surgery | Male   | May       |
| Surgery | Male   | May       |
| Surgery | Female | November  |
| Surgery | Female | November  |
| Surgery | Female | November  |
| Surgery | Male   | November  |
| Surgery | Male   | November  |
| Surgery | Female | November  |
| Surgery | Female | October   |
| Surgery | Male   | October   |
| Surgery | Female | October   |
| Surgery | Male   | October   |
| Surgery | Female | October   |
| Surgery | Female | October   |
| Surgery | Female | September |
| Surgery | Female | September |
| Surgery | Female | September |
| Surgery | Male   | September |
| Surgery | Male   | September |
| Surgery | Female | September |
| Surgery | Male   | April     |
| Surgery | Male   | April     |
| Surgery | Female | April     |
| Surgery | Female | April     |
| Surgery | Male   | April     |
| Surgery | Female | August    |
| Surgery | Female | August    |
| Surgery | Female | August    |
| Surgery | Male   | August    |
| Surgery | Female | August    |

|         |        |          |
|---------|--------|----------|
| Surgery | Male   | August   |
| Surgery | Male   | December |
| Surgery | Female | December |
| Surgery | Female | December |
| Surgery | Male   | December |
| Surgery | Female | December |
| Surgery | Male   | December |
| Surgery | Female | December |
| Surgery | Female | December |
| Surgery | Male   | February |
| Surgery | Female | February |
| Surgery | Male   | February |
| Surgery | Female | February |
| Surgery | Male   | January  |
| Surgery | Female | January  |
| Surgery | Male   | January  |
| Surgery | Male   | January  |
| Surgery | Male   | January  |
| Surgery | Female | July     |
| Surgery | Female | July     |
| Surgery | Male   | July     |
| Surgery | Female | July     |
| Surgery | Female | July     |
| Surgery | Male   | July     |
| Surgery | Male   | June     |
| Surgery | Female | June     |
| Surgery | Male   | June     |
| Surgery | Male   | June     |
| Surgery | Female | March    |
| Surgery | Male   | March    |
| Surgery | Female | March    |
| Surgery | Female | May      |
| Surgery | Female | May      |
| Surgery | Male   | May      |
| Surgery | Male   | May      |
| Surgery | Female | May      |
| Surgery | Male   | May      |

|         |        |           |
|---------|--------|-----------|
| Surgery | Female | May       |
| Surgery | Female | May       |
| Surgery | Female | November  |
| Surgery | Male   | November  |
| Surgery | Female | November  |
| Surgery | Male   | October   |
| Surgery | Male   | October   |
| Surgery | Female | October   |
| Surgery | Female | October   |
| Surgery | Female | October   |
| Surgery | Male   | October   |
| Surgery | Female | September |
| Surgery | Male   | September |
| Surgery | Female | April     |
| Surgery | Male   | April     |
| Surgery | Male   | April     |
| Surgery | Female | April     |
| Surgery | Male   | April     |
| Surgery | Female | August    |
| Surgery | Male   | August    |
| Surgery | Male   | August    |
| Surgery | Female | August    |
| Surgery | Male   | August    |
| Surgery | Female | August    |
| Surgery | Female | August    |
| Surgery | Female | August    |
| Surgery | Male   | August    |
| Surgery | Female | August    |
| Surgery | Male   | August    |
| Surgery | Male   | August    |
| Surgery | Male   | August    |
| Surgery | Female | August    |
| Surgery | Female | August    |
| Surgery | Male   | August    |
| Surgery | Male   | December  |
| Surgery | Female | December  |
| Surgery | Male   | December  |
| Surgery | Female | December  |
| Surgery | Female | December  |

|         |        |          |
|---------|--------|----------|
| Surgery | Male   | December |
| Surgery | Female | December |
| Surgery | Male   | December |
| Surgery | Female | December |
| Surgery | Male   | December |
| Surgery | Female | December |
| Surgery | Male   | December |
| Surgery | Female | December |
| Surgery | Male   | December |
| Surgery | Female | December |
| Surgery | Male   | December |
| Surgery | Male   | July     |
| Surgery | Female | July     |
| Surgery | Female | June     |
| Surgery | Female | June     |
| Surgery | Female | March    |
| Surgery | Male   | March    |
| Surgery | Female | March    |
| Surgery | Female | March    |
| Surgery | Male   | March    |
| Surgery | Male   | March    |
| Surgery | Female | March    |
| Surgery | Male   | March    |
| Surgery | Female | March    |
| Surgery | Male   | March    |
| Surgery | Female | March    |
| Surgery | Male   | March    |
| Surgery | Male   | March    |
| Surgery | Female | March    |
| Surgery | Male   | March    |
| Surgery | Female | March    |
| Surgery | Male   | May      |
| Surgery | Male   | November |
| Surgery | Female | November |
| Surgery | Male   | November |
| Surgery | Female | November |
| Surgery | Male   | November |
| Surgery | Female | November |
| Surgery | Male   | November |
| Surgery | Male   | November |
| Surgery | Female | November |
| Surgery | Male   | November |
| Surgery | Female | November |
| Surgery | Male   | November |
| Surgery | Female | November |
| Surgery | Male   | November |
| Surgery | Female | November |
| Surgery | Male   | October  |
| Surgery | Female | October  |

|         |        |           |
|---------|--------|-----------|
| Surgery | Male   | September |
| Surgery | Female | September |
| Surgery | Female | September |
| Surgery | Male   | September |
| Surgery | Female | September |
| Surgery | Male   | September |
| Surgery | Male   | September |
| Surgery | Male   | September |
| Surgery | Female | September |
| Surgery | Female | September |
| Surgery | Male   | September |
| Surgery | Female | September |
| Surgery | Male   | September |
| Surgery | Female | September |
| Surgery | Female | September |
| Surgery | Male   | September |
| Surgery | Female | April     |
| Surgery | Male   | April     |
| Surgery | Female | August    |
| Surgery | Female | August    |
| Surgery | Male   | December  |
| Surgery | Female | December  |
| Surgery | Male   | December  |
| Surgery | Female | December  |
| Surgery | Female | February  |
| Surgery | Male   | February  |
| Surgery | Female | February  |
| Surgery | Male   | February  |
| Surgery | Male   | February  |
| Surgery | Female | February  |
| Surgery | Male   | February  |
| Surgery | Female | February  |
| Surgery | Female | February  |
| Surgery | Male   | February  |
| Surgery | Male   | February  |
| Surgery | Female | February  |
| Surgery | Female | February  |
| Surgery | Male   | January   |
| Surgery | Female | January   |
| Surgery | Male   | January   |
| Surgery | Female | January   |
| Surgery | Female | January   |
| Surgery | Male   | January   |
| Surgery | Male   | January   |
| Surgery | Male   | January   |
| Surgery | Female | January   |
| Surgery | Female | January   |
| Surgery | Female | January   |
| Surgery | Male   | January   |

|         |        |           |
|---------|--------|-----------|
| Surgery | Male   | July      |
| Surgery | Female | July      |
| Surgery | Male   | July      |
| Surgery | Female | July      |
| Surgery | Female | July      |
| Surgery | Female | July      |
| Surgery | Male   | July      |
| Surgery | Male   | June      |
| Surgery | Female | June      |
| Surgery | Female | March     |
| Surgery | Male   | March     |
| Surgery | Female | March     |
| Surgery | Male   | March     |
| Surgery | Male   | March     |
| Surgery | Female | March     |
| Surgery | Female | March     |
| Surgery | Female | March     |
| Surgery | Male   | March     |
| Surgery | Female | March     |
| Surgery | Male   | March     |
| Surgery | Female | March     |
| Surgery | Male   | March     |
| Surgery | Male   | May       |
| Surgery | Female | May       |
| Surgery | Female | May       |
| Surgery | Male   | November  |
| Surgery | Male   | November  |
| Surgery | Female | November  |
| Surgery | Female | November  |
| Surgery | Male   | November  |
| Surgery | Female | November  |
| Surgery | Male   | November  |
| Surgery | Female | November  |
| Surgery | Female | November  |
| Surgery | Female | November  |
| Surgery | Male   | November  |
| Surgery | Male   | October   |
| Surgery | Female | October   |
| Surgery | Female | September |
| Surgery | Female | September |
| Surgery | Male   | September |
| Surgery | Female | September |

|         |        |           |
|---------|--------|-----------|
| Surgery | Male   | September |
| Surgery | Female | September |
| Surgery | Male   | September |
| Surgery | Female | September |
| Surgery | Male   | September |
| Surgery | Female | September |
| Surgery | Male   | September |
| Surgery | Male   | September |
| Surgery | Female | September |
| Surgery | Male   | April     |
| Surgery | Female | April     |
| Surgery | Male   | April     |
| Surgery | Female | April     |
| Surgery | Male   | April     |
| Surgery | Female | April     |
| Surgery | Female | April     |
| Surgery | Male   | April     |
| Surgery | Female | August    |
| Surgery | Female | August    |
| Surgery | Female | August    |
| Surgery | Male   | August    |
| Surgery | Female | August    |
| Surgery | Male   | August    |
| Surgery | Male   | August    |
| Surgery | Male   | August    |
| Surgery | Female | August    |
| Surgery | Male   | December  |
| Surgery | Female | December  |
| Surgery | Male   | December  |
| Surgery | Female | December  |
| Surgery | Male   | December  |
| Surgery | Female | December  |
| Surgery | Female | December  |
| Surgery | Female | December  |
| Surgery | Male   | December  |
| Surgery | Female | February  |
| Surgery | Male   | February  |
| Surgery | Female | February  |
| Surgery | Male   | February  |
| Surgery | Male   | February  |
| Surgery | Male   | February  |
| Surgery | Female | February  |
| Surgery | Female | February  |
| Surgery | Female | February  |
| Surgery | Male   | January   |
| Surgery | Female | January   |

|         |        |          |
|---------|--------|----------|
| Surgery | Male   | January  |
| Surgery | Female | January  |
| Surgery | Male   | January  |
| Surgery | Male   | January  |
| Surgery | Male   | July     |
| Surgery | Female | July     |
| Surgery | Male   | July     |
| Surgery | Female | July     |
| Surgery | Female | July     |
| Surgery | Male   | July     |
| Surgery | Female | June     |
| Surgery | Male   | June     |
| Surgery | Female | June     |
| Surgery | Male   | June     |
| Surgery | Female | June     |
| Surgery | Female | June     |
| Surgery | Male   | June     |
| Surgery | Female | June     |
| Surgery | Male   | June     |
| Surgery | Female | March    |
| Surgery | Male   | March    |
| Surgery | Male   | March    |
| Surgery | Female | March    |
| Surgery | Female | March    |
| Surgery | Female | March    |
| Surgery | Male   | March    |
| Surgery | Female | March    |
| Surgery | Male   | March    |
| Surgery | Male   | May      |
| Surgery | Male   | May      |
| Surgery | Female | May      |
| Surgery | Male   | May      |
| Surgery | Female | May      |
| Surgery | Male   | May      |
| Surgery | Male   | November |
| Surgery | Female | November |
| Surgery | Male   | November |
| Surgery | Male   | November |
| Surgery | Female | November |
| Surgery | Female | November |
| Surgery | Male   | November |
| Surgery | Female | October  |
| Surgery | Male   | October  |
| Surgery | Female | October  |
| Surgery | Male   | October  |
| Surgery | Female | October  |
| Surgery | Female | October  |

|              |        |           |
|--------------|--------|-----------|
| Surgery      | Female | September |
| Surgery      | Male   | September |
| Radiotherapy | Male   | April     |
| Radiotherapy | Female | April     |
| Radiotherapy | Male   | April     |
| Radiotherapy | Female | April     |
| Radiotherapy | Male   | April     |
| Radiotherapy | Female | April     |
| Radiotherapy | Female | April     |
| Radiotherapy | Male   | April     |
| Radiotherapy | Male   | April     |
| Radiotherapy | Female | April     |
| Radiotherapy | Female | April     |
| Radiotherapy | Male   | April     |
| Radiotherapy | Female | April     |
| Radiotherapy | Male   | April     |
| Radiotherapy | Female | February  |
| Radiotherapy | Male   | February  |
| Radiotherapy | Female | February  |
| Radiotherapy | Male   | February  |
| Radiotherapy | Male   | February  |
| Radiotherapy | Female | February  |
| Radiotherapy | Male   | February  |
| Radiotherapy | Female | February  |
| Radiotherapy | Male   | February  |
| Radiotherapy | Female | February  |
| Radiotherapy | Male   | February  |
| Radiotherapy | Female | February  |
| Radiotherapy | Female | February  |
| Radiotherapy | Female | January   |
| Radiotherapy | Male   | January   |
| Radiotherapy | Male   | January   |
| Radiotherapy | Female | January   |
| Radiotherapy | Male   | January   |
| Radiotherapy | Female | January   |
| Radiotherapy | Female | January   |
| Radiotherapy | Male   | January   |
| Radiotherapy | Male   | January   |
| Radiotherapy | Female | January   |
| Radiotherapy | Male   | January   |
| Radiotherapy | Female | January   |
| Radiotherapy | Male   | January   |
| Radiotherapy | Female | January   |
| Radiotherapy | Female | July      |
| Radiotherapy | Female | July      |
| Radiotherapy | Male   | July      |

|              |        |       |
|--------------|--------|-------|
| Radiotherapy | Female | July  |
| Radiotherapy | Male   | July  |
| Radiotherapy | Male   | July  |
| Radiotherapy | Male   | July  |
| Radiotherapy | Female | July  |
| Radiotherapy | Male   | July  |
| Radiotherapy | Female | July  |
| Radiotherapy | Female | July  |
| Radiotherapy | Male   | July  |
| Radiotherapy | Male   | July  |
| Radiotherapy | Female | July  |
| Radiotherapy | Female | June  |
| Radiotherapy | Female | June  |
| Radiotherapy | Male   | June  |
| Radiotherapy | Male   | June  |
| Radiotherapy | Female | June  |
| Radiotherapy | Female | June  |
| Radiotherapy | Male   | June  |
| Radiotherapy | Female | June  |
| Radiotherapy | Male   | June  |
| Radiotherapy | Male   | June  |
| Radiotherapy | Female | June  |
| Radiotherapy | Female | June  |
| Radiotherapy | Male   | June  |
| Radiotherapy | Male   | June  |
| Radiotherapy | Female | March |
| Radiotherapy | Male   | March |
| Radiotherapy | Female | March |
| Radiotherapy | Female | March |
| Radiotherapy | Female | March |
| Radiotherapy | Male   | March |
| Radiotherapy | Female | March |
| Radiotherapy | Female | March |
| Radiotherapy | Female | March |
| Radiotherapy | Male   | March |
| Radiotherapy | Male   | May   |
| Radiotherapy | Male   | May   |
| Radiotherapy | Female | May   |
| Radiotherapy | Female | May   |
| Radiotherapy | Female | May   |
| Radiotherapy | Male   | May   |
| Radiotherapy | Female | May   |
| Radiotherapy | Male   | May   |
| Radiotherapy | Male   | May   |
| Radiotherapy | Female | May   |
| Radiotherapy | Male   | May   |

|              |        |           |
|--------------|--------|-----------|
| Radiotherapy | Male   | May       |
| Radiotherapy | Female | May       |
| Radiotherapy | Female | May       |
| Radiotherapy | Male   | November  |
| Radiotherapy | Female | November  |
| Radiotherapy | Female | November  |
| Radiotherapy | Male   | November  |
| Radiotherapy | Female | November  |
| Radiotherapy | Female | November  |
| Radiotherapy | Male   | November  |
| Radiotherapy | Female | November  |
| Radiotherapy | Female | November  |
| Radiotherapy | Male   | November  |
| Radiotherapy | Female | November  |
| Radiotherapy | Female | October   |
| Radiotherapy | Male   | October   |
| Radiotherapy | Male   | October   |
| Radiotherapy | Male   | October   |
| Radiotherapy | Female | October   |
| Radiotherapy | Female | October   |
| Radiotherapy | Male   | October   |
| Radiotherapy | Female | October   |
| Radiotherapy | Male   | October   |
| Radiotherapy | Female | October   |
| Radiotherapy | Female | October   |
| Radiotherapy | Male   | October   |
| Radiotherapy | Female | October   |
| Radiotherapy | Female | October   |
| Radiotherapy | Male   | October   |
| Radiotherapy | Female | October   |
| Radiotherapy | Female | September |
| Radiotherapy | Female | September |
| Radiotherapy | Male   | September |
| Radiotherapy | Female | September |
| Radiotherapy | Male   | September |
| Radiotherapy | Male   | September |
| Radiotherapy | Female | September |
| Radiotherapy | Female | September |
| Radiotherapy | Male   | September |
| Radiotherapy | Female | April     |
| Radiotherapy | Female | April     |
| Radiotherapy | Male   | April     |
| Radiotherapy | Female | April     |
| Radiotherapy | Male   | April     |
| Radiotherapy | Female | April     |
| Radiotherapy | Male   | April     |
| Radiotherapy | Male   | April     |
| Radiotherapy | Male   | August    |
| Radiotherapy | Female | August    |

|              |        |          |
|--------------|--------|----------|
| Radiotherapy | Female | December |
| Radiotherapy | Female | December |
| Radiotherapy | Male   | December |
| Radiotherapy | Female | December |
| Radiotherapy | Male   | December |
| Radiotherapy | Female | December |
| Radiotherapy | Male   | December |
| Radiotherapy | Male   | December |
| Radiotherapy | Male   | February |
| Radiotherapy | Female | February |
| Radiotherapy | Male   | February |
| Radiotherapy | Female | February |
| Radiotherapy | Female | February |
| Radiotherapy | Male   | February |
| Radiotherapy | Female | February |
| Radiotherapy | Male   | February |
| Radiotherapy | Male   | January  |
| Radiotherapy | Female | January  |
| Radiotherapy | Male   | January  |
| Radiotherapy | Female | January  |
| Radiotherapy | Male   | January  |
| Radiotherapy | Female | January  |
| Radiotherapy | Female | January  |
| Radiotherapy | Male   | January  |
| Radiotherapy | Female | June     |
| Radiotherapy | Male   | June     |
| Radiotherapy | Female | June     |
| Radiotherapy | Male   | June     |
| Radiotherapy | Female | June     |
| Radiotherapy | Female | June     |
| Radiotherapy | Male   | June     |
| Radiotherapy | Male   | June     |
| Radiotherapy | Male   | March    |
| Radiotherapy | Male   | March    |
| Radiotherapy | Male   | March    |
| Radiotherapy | Female | March    |
| Radiotherapy | Female | March    |
| Radiotherapy | Female | March    |
| Radiotherapy | Male   | March    |
| Radiotherapy | Female | March    |
| Radiotherapy | Female | May      |
| Radiotherapy | Male   | May      |
| Radiotherapy | Male   | May      |
| Radiotherapy | Female | May      |
| Radiotherapy | Female | May      |
| Radiotherapy | Male   | May      |
| Radiotherapy | Female | May      |
| Radiotherapy | Male   | May      |
| Radiotherapy | Female | November |
| Radiotherapy | Male   | November |

|              |        |           |
|--------------|--------|-----------|
| Radiotherapy | Male   | November  |
| Radiotherapy | Female | November  |
| Radiotherapy | Female | November  |
| Radiotherapy | Male   | November  |
| Radiotherapy | Male   | November  |
| Radiotherapy | Female | November  |
| Radiotherapy | Female | October   |
| Radiotherapy | Male   | October   |
| Radiotherapy | Female | October   |
| Radiotherapy | Male   | October   |
| Radiotherapy | Male   | October   |
| Radiotherapy | Female | October   |
| Radiotherapy | Female | October   |
| Radiotherapy | Male   | October   |
| Radiotherapy | Male   | September |
| Radiotherapy | Female | September |
| Radiotherapy | Male   | September |
| Radiotherapy | Female | September |
| Radiotherapy | Female | September |
| Radiotherapy | Male   | September |
| Radiotherapy | Female | September |
| Radiotherapy | Male   | September |
| Radiotherapy | Male   | April     |
| Radiotherapy | Female | April     |
| Radiotherapy | Male   | April     |
| Radiotherapy | Male   | April     |
| Radiotherapy | Female | April     |
| Radiotherapy | Female | April     |
| Radiotherapy | Male   | August    |
| Radiotherapy | Male   | August    |
| Radiotherapy | Female | August    |
| Radiotherapy | Female | August    |
| Radiotherapy | Male   | August    |
| Radiotherapy | Female | December  |
| Radiotherapy | Male   | December  |
| Radiotherapy | Female | December  |
| Radiotherapy | Male   | December  |
| Radiotherapy | Male   | December  |
| Radiotherapy | Female | December  |
| Radiotherapy | Male   | February  |
| Radiotherapy | Male   | February  |
| Radiotherapy | Female | February  |
| Radiotherapy | Female | February  |
| Radiotherapy | Female | February  |
| Radiotherapy | Male   | February  |
| Radiotherapy | Female | January   |
| Radiotherapy | Female | January   |
| Radiotherapy | Female | January   |
| Radiotherapy | Male   | January   |
| Radiotherapy | Male   | January   |

|              |        |           |
|--------------|--------|-----------|
| Radiotherapy | Male   | January   |
| Radiotherapy | Female | July      |
| Radiotherapy | Male   | July      |
| Radiotherapy | Male   | July      |
| Radiotherapy | Female | July      |
| Radiotherapy | Male   | July      |
| Radiotherapy | Male   | June      |
| Radiotherapy | Female | June      |
| Radiotherapy | Female | June      |
| Radiotherapy | Male   | June      |
| Radiotherapy | Male   | June      |
| Radiotherapy | Female | June      |
| Radiotherapy | Female | March     |
| Radiotherapy | Female | March     |
| Radiotherapy | Male   | March     |
| Radiotherapy | Male   | March     |
| Radiotherapy | Male   | March     |
| Radiotherapy | Female | March     |
| Radiotherapy | Male   | May       |
| Radiotherapy | Female | May       |
| Radiotherapy | Female | May       |
| Radiotherapy | Male   | May       |
| Radiotherapy | Male   | May       |
| Radiotherapy | Female | November  |
| Radiotherapy | Female | November  |
| Radiotherapy | Male   | November  |
| Radiotherapy | Female | October   |
| Radiotherapy | Male   | October   |
| Radiotherapy | Female | October   |
| Radiotherapy | Male   | October   |
| Radiotherapy | Male   | September |
| Radiotherapy | Female | September |
| Radiotherapy | Female | September |
| Radiotherapy | Male   | September |
| Radiotherapy | Female | September |
| Radiotherapy | Male   | September |
| Radiotherapy | Male   | April     |
| Radiotherapy | Female | April     |
| Radiotherapy | Female | August    |
| Radiotherapy | Male   | August    |
| Radiotherapy | Female | August    |
| Radiotherapy | Male   | August    |
| Radiotherapy | Female | August    |
| Radiotherapy | Male   | August    |
| Radiotherapy | Male   | August    |
| Radiotherapy | Female | August    |
| Radiotherapy | Male   | August    |
| Radiotherapy | Female | August    |
| Radiotherapy | Female | August    |
| Radiotherapy | Male   | August    |

|                                           |        |           |
|-------------------------------------------|--------|-----------|
| Radiotherapy                              | Female | August    |
| Radiotherapy                              | Male   | August    |
| Radiotherapy                              | Female | August    |
| Radiotherapy                              | Male   | August    |
| Radiotherapy                              | Male   | December  |
| Radiotherapy                              | Male   | December  |
| Radiotherapy                              | Female | December  |
| Radiotherapy                              | Female | February  |
| Radiotherapy                              | Male   | January   |
| Radiotherapy                              | Female | January   |
| Radiotherapy                              | Male   | July      |
| Radiotherapy                              | Female | July      |
| Radiotherapy                              | Male   | July      |
| Radiotherapy                              | Male   | July      |
| Radiotherapy                              | Male   | July      |
| Radiotherapy                              | Female | July      |
| Radiotherapy                              | Male   | July      |
| Radiotherapy                              | Female | July      |
| Radiotherapy                              | Male   | July      |
| Radiotherapy                              | Male   | July      |
| Radiotherapy                              | Female | July      |
| Radiotherapy                              | Male   | July      |
| Radiotherapy                              | Female | June      |
| Radiotherapy                              | Male   | June      |
| Radiotherapy                              | Female | March     |
| Radiotherapy                              | Male   | March     |
| Radiotherapy                              | Male   | May       |
| Radiotherapy                              | Female | May       |
| Radiotherapy                              | Male   | November  |
| Radiotherapy                              | Female | October   |
| Radiotherapy                              | Male   | October   |
| Radiotherapy                              | Female | October   |
| Radiotherapy                              | Male   | September |
| Radiotherapy                              | Female | September |
| Radiotherapy                              | Female | September |
| Radiotherapy                              | Male   | September |
| Nuclear medicine or Radioiodine treatment | Male   | April     |
| Nuclear medicine or Radioiodine treatment | Female | April     |
| Nuclear medicine or Radioiodine treatment | Male   | April     |
| Nuclear medicine or Radioiodine treatment | Female | April     |
| Nuclear medicine or Radioiodine treatment | Female | April     |
| Nuclear medicine or Radioiodine treatment | Female | August    |
| Nuclear medicine or Radioiodine treatment | Male   | August    |
| Nuclear medicine or Radioiodine treatment | Female | August    |
| Nuclear medicine or Radioiodine treatment | Male   | August    |
| Nuclear medicine or Radioiodine treatment | Female | August    |

[illegible]

|                                           |        |           |
|-------------------------------------------|--------|-----------|
| Nuclear medicine or Radioiodine treatment | Male   | November  |
| Nuclear medicine or Radioiodine treatment | Male   | November  |
| Nuclear medicine or Radioiodine treatment | Female | November  |
| Nuclear medicine or Radioiodine treatment | Male   | November  |
| Nuclear medicine or Radioiodine treatment | Female | September |
| Nuclear medicine or Radioiodine treatment | Male   | September |
| Nuclear medicine or Radioiodine treatment | Male   | September |
| Nuclear medicine or Radioiodine treatment | Female | September |
| Nuclear medicine or Radioiodine treatment | Male   | September |
| Nuclear medicine or Radioiodine treatment | Female | September |
| Nuclear medicine or Radioiodine treatment | Male   | September |
| Nuclear medicine or Radioiodine treatment | Female | September |
| Radiotherapy                              | Female | April     |
| Radiotherapy                              | Female | August    |
| Radiotherapy                              | Male   | August    |
| Radiotherapy                              | Female | August    |
| Radiotherapy                              | Male   | December  |
| Radiotherapy                              | Female | February  |
| Radiotherapy                              | Female | January   |
| Radiotherapy                              | Female | July      |
| Radiotherapy                              | Female | July      |
| Radiotherapy                              | Male   | July      |
| Radiotherapy                              | Female | June      |
| Radiotherapy                              | Female | March     |
| Radiotherapy                              | Female | May       |
| Radiotherapy                              | Female | November  |
| Radiotherapy                              | Female | October   |
| Radiotherapy                              | Female | September |
| Nuclear medicine or Radioiodine treatment | Female | April     |
| Nuclear medicine or Radioiodine treatment | Male   | April     |
| Nuclear medicine or Radioiodine treatment | Female | April     |
| Nuclear medicine or Radioiodine treatment | Male   | April     |
| Nuclear medicine or Radioiodine treatment | Female | April     |
| Nuclear medicine or Radioiodine treatment | Male   | April     |
| Nuclear medicine or Radioiodine treatment | Female | April     |
| Nuclear medicine or Radioiodine treatment | Male   | April     |
| Nuclear medicine or Radioiodine treatment | Female | August    |
| Nuclear medicine or Radioiodine treatment | Male   | August    |
| Nuclear medicine or Radioiodine treatment | Male   | August    |
| Nuclear medicine or Radioiodine treatment | Female | August    |
| Nuclear medicine or Radioiodine treatment | Female | August    |
| Nuclear medicine or Radioiodine treatment | Male   | August    |
| Nuclear medicine or Radioiodine treatment | Female | August    |
| Nuclear medicine or Radioiodine treatment | Female | August    |
| Nuclear medicine or Radioiodine treatment | Male   | August    |
| Nuclear medicine or Radioiodine treatment | Male   | August    |
| Nuclear medicine or Radioiodine treatment | Male   | December  |
| Nuclear medicine or Radioiodine treatment | Female | December  |
| Nuclear medicine or Radioiodine treatment | Male   | December  |
| Nuclear medicine or Radioiodine treatment | Female | December  |

[illegible]

[illegible]



[illegible]

|         |        |          |
|---------|--------|----------|
| Surgery | Female | August   |
| Surgery | Male   | August   |
| Surgery | Male   | August   |
| Surgery | Female | August   |
| Surgery | Female | August   |
| Surgery | Male   | August   |
| Surgery | Female | August   |
| Surgery | Male   | December |
| Surgery | Female | December |
| Surgery | Male   | December |
| Surgery | Female | December |
| Surgery | Female | December |
| Surgery | Female | December |
| Surgery | Male   | December |
| Surgery | Female | February |
| Surgery | Male   | February |
| Surgery | Female | February |
| Surgery | Female | January  |
| Surgery | Female | January  |
| Surgery | Female | January  |
| Surgery | Male   | January  |
| Surgery | Female | January  |
| Surgery | Male   | January  |
| Surgery | Female | July     |
| Surgery | Female | July     |
| Surgery | Male   | July     |
| Surgery | Female | July     |
| Surgery | Female | July     |
| Surgery | Female | July     |
| Surgery | Male   | July     |
| Surgery | Male   | July     |
| Surgery | Female | July     |
| Surgery | Female | July     |
| Surgery | Male   | July     |
| Surgery | Female | July     |
| Surgery | Female | June     |
| Surgery | Female | June     |
| Surgery | Male   | June     |
| Surgery | Female | June     |
| Surgery | Female | June     |
| Surgery | Female | June     |
| Surgery | Male   | March    |
| Surgery | Male   | March    |
| Surgery | Male   | March    |

|                                           |        |           |
|-------------------------------------------|--------|-----------|
| Surgery                                   | Female | March     |
| Surgery                                   | Female | March     |
| Surgery                                   | Female | May       |
| Surgery                                   | Male   | May       |
| Surgery                                   | Male   | May       |
| Surgery                                   | Female | May       |
| Surgery                                   | Male   | May       |
| Surgery                                   | Male   | May       |
| Surgery                                   | Male   | November  |
| Surgery                                   | Male   | November  |
| Surgery                                   | Male   | November  |
| Surgery                                   | Female | November  |
| Surgery                                   | Female | November  |
| Surgery                                   | Female | October   |
| Surgery                                   | Male   | October   |
| Surgery                                   | Female | October   |
| Surgery                                   | Male   | October   |
| Surgery                                   | Female | October   |
| Surgery                                   | Male   | October   |
| Surgery                                   | Female | October   |
| Surgery                                   | Female | October   |
| Surgery                                   | Female | September |
| Surgery                                   | Female | September |
| Surgery                                   | Male   | September |
| Surgery                                   | Female | September |
| Surgery                                   | Male   | September |
| Surgery                                   | Male   | September |
| Surgery                                   | Female | September |
| Surgery                                   | Female | September |
| Surgery                                   | Female | September |
| Surgery                                   | Male   | September |
| Nuclear medicine or Radioiodine treatment | Female | April     |
| Nuclear medicine or Radioiodine treatment | Male   | April     |
| Radiotherapy                              | Male   | August    |
| Radiotherapy                              | Female | August    |
| Radiotherapy                              | Female | August    |
| Radiotherapy                              | Female | August    |
| Radiotherapy                              | Male   | December  |
| Radiotherapy                              | Male   | December  |
| Radiotherapy                              | Female | December  |
| Radiotherapy                              | Male   | December  |
| Radiotherapy                              | Female | December  |
| Radiotherapy                              | Male   | January   |
| Nuclear medicine or Radioiodine treatment | Male   | July      |

|                                           |        |           |
|-------------------------------------------|--------|-----------|
| Radiotherapy                              | Female | July      |
| Nuclear medicine or Radioiodine treatment | Male   | July      |
| Radiotherapy                              | Male   | July      |
| Radiotherapy                              | Female | July      |
| Radiotherapy                              | Male   | July      |
| Nuclear medicine or Radioiodine treatment | Male   | June      |
| Nuclear medicine or Radioiodine treatment | Male   | June      |
| Nuclear medicine or Radioiodine treatment | Female | June      |
| Radiotherapy                              | Male   | June      |
| Radiotherapy                              | Male   | June      |
| Radiotherapy                              | Female | June      |
| Nuclear medicine or Radioiodine treatment | Female | March     |
| Nuclear medicine or Radioiodine treatment | Male   | March     |
| Nuclear medicine or Radioiodine treatment | Female | March     |
| Nuclear medicine or Radioiodine treatment | Female | March     |
| Nuclear medicine or Radioiodine treatment | Male   | March     |
| Nuclear medicine or Radioiodine treatment | Female | March     |
| Nuclear medicine or Radioiodine treatment | Male   | March     |
| Radiotherapy                              | Female | May       |
| Radiotherapy                              | Female | May       |
| Radiotherapy                              | Male   | November  |
| Radiotherapy                              | Female | November  |
| Radiotherapy                              | Male   | November  |
| Radiotherapy                              | Male   | November  |
| Nuclear medicine or Radioiodine treatment | Female | November  |
| Nuclear medicine or Radioiodine treatment | Female | November  |
| Radiotherapy                              | Female | November  |
| Nuclear medicine or Radioiodine treatment | Male   | November  |
| Radiotherapy                              | Female | November  |
| Radiotherapy                              | Female | November  |
| Radiotherapy                              | Male   | November  |
| Radiotherapy                              | Female | October   |
| Nuclear medicine or Radioiodine treatment | Female | October   |
| Radiotherapy                              | Male   | October   |
| Radiotherapy                              | Female | October   |
| Radiotherapy                              | Male   | October   |
| Nuclear medicine or Radioiodine treatment | Female | October   |
| Nuclear medicine or Radioiodine treatment | Female | October   |
| Radiotherapy                              | Male   | October   |
| Radiotherapy                              | Female | October   |
| Radiotherapy                              | Male   | September |
| Radiotherapy                              | Male   | September |
| Radiotherapy                              | Female | September |
| Radiotherapy                              | Male   | September |
| Hormonal or Targeted therapies            | Female | April     |
| Hormonal or Targeted therapies            | Male   | April     |
| Hormonal or Targeted therapies            | Male   | April     |
| Hormonal or Targeted therapies            | Male   | April     |
| Hormonal or Targeted therapies            | Female | April     |
| Hormonal or Targeted therapies            | Male   | April     |

[illegible]

[illegible]

|                                           |        |           |
|-------------------------------------------|--------|-----------|
| Hormonal or Targeted therapies            | Female | May       |
| Hormonal or Targeted therapies            | Male   | May       |
| Hormonal or Targeted therapies            | Female | November  |
| Hormonal or Targeted therapies            | Female | November  |
| Hormonal or Targeted therapies            | Female | November  |
| Hormonal or Targeted therapies            | Male   | November  |
| Hormonal or Targeted therapies            | Male   | November  |
| Hormonal or Targeted therapies            | Female | November  |
| Hormonal or Targeted therapies            | Male   | November  |
| Hormonal or Targeted therapies            | Female | October   |
| Hormonal or Targeted therapies            | Female | October   |
| Hormonal or Targeted therapies            | Female | October   |
| Hormonal or Targeted therapies            | Male   | October   |
| Hormonal or Targeted therapies            | Male   | October   |
| Hormonal or Targeted therapies            | Female | October   |
| Hormonal or Targeted therapies            | Male   | October   |
| Hormonal or Targeted therapies            | Female | October   |
| Hormonal or Targeted therapies            | Female | October   |
| Hormonal or Targeted therapies            | Female | October   |
| Hormonal or Targeted therapies            | Male   | September |
| Hormonal or Targeted therapies            | Female | September |
| Hormonal or Targeted therapies            | Male   | September |
| Hormonal or Targeted therapies            | Female | September |
| Hormonal or Targeted therapies            | Male   | September |
| Hormonal or Targeted therapies            | Female | September |
| Hormonal or Targeted therapies            | Male   | September |
| Hormonal or Targeted therapies            | Male   | September |
| Hormonal or Targeted therapies            | Female | September |
| Hormonal or Targeted therapies            | Female | September |
| Hormonal or Targeted therapies            | Male   | September |
| Hormonal or Targeted therapies            | Male   | September |
| Hormonal or Targeted therapies            | Male   | September |
| Hormonal or Targeted therapies            | Male   | September |
| Hormonal or Targeted therapies            | Female | September |
| Hormonal or Targeted therapies            | Female | September |
| Hormonal or Targeted therapies            | Male   | September |
| Surgery                                   | Female | April     |
| Surgery                                   | Female | April     |
| Nuclear medicine or Radioiodine treatment | Male   | April     |
| Nuclear medicine or Radioiodine treatment | Male   | April     |
| Nuclear medicine or Radioiodine treatment | Female | April     |
| Surgery                                   | Female | December  |
| Surgery                                   | Female | December  |
| Surgery                                   | Female | February  |
| Radiotherapy                              | Male   | February  |
| Nuclear medicine or Radioiodine treatment | Female | July      |
| Nuclear medicine or Radioiodine treatment | Male   | July      |
| Nuclear medicine or Radioiodine treatment | Female | July      |
| Nuclear medicine or Radioiodine treatment | Male   | July      |

|                                           |        |          |
|-------------------------------------------|--------|----------|
| Nuclear medicine or Radioiodine treatment | Female | July     |
| Nuclear medicine or Radioiodine treatment | Male   | July     |
| Nuclear medicine or Radioiodine treatment | Male   | July     |
| Nuclear medicine or Radioiodine treatment | Female | July     |
| Nuclear medicine or Radioiodine treatment | Male   | July     |
| Nuclear medicine or Radioiodine treatment | Female | July     |
| Nuclear medicine or Radioiodine treatment | Female | July     |
| Nuclear medicine or Radioiodine treatment | Male   | July     |
| Nuclear medicine or Radioiodine treatment | Female | July     |
| Surgery                                   | Male   | July     |
| Surgery                                   | Female | July     |
| Nuclear medicine or Radioiodine treatment | Female | June     |
| Nuclear medicine or Radioiodine treatment | Male   | June     |
| Nuclear medicine or Radioiodine treatment | Female | June     |
| Nuclear medicine or Radioiodine treatment | Female | June     |
| Nuclear medicine or Radioiodine treatment | Female | June     |
| Nuclear medicine or Radioiodine treatment | Male   | June     |
| Nuclear medicine or Radioiodine treatment | Female | June     |
| Surgery                                   | Female | June     |
| Surgery                                   | Male   | March    |
| Surgery                                   | Female | March    |
| Surgery                                   | Male   | March    |
| Surgery                                   | Female | March    |
| Nuclear medicine or Radioiodine treatment | Female | March    |
| Nuclear medicine or Radioiodine treatment | Female | March    |
| Nuclear medicine or Radioiodine treatment | Male   | March    |
| Surgery                                   | Female | May      |
| Surgery                                   | Female | November |
| Surgery                                   | Male   | November |
| Surgery                                   | Female | November |
| Nuclear medicine or Radioiodine treatment | Female | November |
| Nuclear medicine or Radioiodine treatment | Male   | November |
| Nuclear medicine or Radioiodine treatment | Male   | November |
| Radiotherapy                              | Male   | November |
| Nuclear medicine or Radioiodine treatment | Female | November |
| Nuclear medicine or Radioiodine treatment | Female | November |
| Nuclear medicine or Radioiodine treatment | Male   | November |
| Nuclear medicine or Radioiodine treatment | Female | November |
| Nuclear medicine or Radioiodine treatment | Female | November |
| Nuclear medicine or Radioiodine treatment | Male   | November |
| Nuclear medicine or Radioiodine treatment | Female | October  |
| Nuclear medicine or Radioiodine treatment | Female | October  |
| Nuclear medicine or Radioiodine treatment | Male   | October  |
| Nuclear medicine or Radioiodine treatment | Female | October  |
| Nuclear medicine or Radioiodine treatment | Male   | October  |
| Nuclear medicine or Radioiodine treatment | Female | October  |
| Nuclear medicine or Radioiodine treatment | Male   | October  |
| Nuclear medicine or Radioiodine treatment | Male   | October  |
| Nuclear medicine or Radioiodine treatment | Female | October  |
| Nuclear medicine or Radioiodine treatment | Male   | October  |

|                                           |        |           |
|-------------------------------------------|--------|-----------|
| Nuclear medicine or Radioiodine treatment | Female | October   |
| Nuclear medicine or Radioiodine treatment | Male   | October   |
| Nuclear medicine or Radioiodine treatment | Female | October   |
| Nuclear medicine or Radioiodine treatment | Male   | October   |
| Nuclear medicine or Radioiodine treatment | Female | October   |
| Nuclear medicine or Radioiodine treatment | Male   | October   |
| Nuclear medicine or Radioiodine treatment | Female | October   |
| Nuclear medicine or Radioiodine treatment | Male   | October   |
| Nuclear medicine or Radioiodine treatment | Female | October   |
| Nuclear medicine or Radioiodine treatment | Male   | October   |
| Surgery                                   | Male   | September |
| Surgery                                   | Female | September |
| Surgery                                   | Male   | September |
| Surgery                                   | Male   | September |
| Surgery                                   | Male   | April     |
| Surgery                                   | Female | April     |
| Surgery                                   | Female | April     |
| Surgery                                   | Female | April     |
| Surgery                                   | Male   | April     |
| Surgery                                   | Male   | April     |
| Surgery                                   | Male   | April     |
| Surgery                                   | Female | April     |
| Surgery                                   | Female | August    |
| Surgery                                   | Female | August    |
| Surgery                                   | Male   | August    |
| Radiotherapy                              | Male   | August    |
| Surgery                                   | Female | August    |
| Surgery                                   | Male   | August    |
| Surgery                                   | Female | August    |
| Surgery                                   | Male   | August    |
| Radiotherapy                              | Female | August    |
| Radiotherapy                              | Male   | August    |
| Radiotherapy                              | Male   | August    |
| Radiotherapy                              | Female | August    |
| Radiotherapy                              | Male   | August    |
| Radiotherapy                              | Female | August    |
| Radiotherapy                              | Female | August    |
| Radiotherapy                              | Male   | August    |
| Radiotherapy                              | Female | August    |
| Radiotherapy                              | Male   | August    |
| Surgery                                   | Female | December  |
| Surgery                                   | Male   | December  |
| Surgery                                   | Female | December  |
| Surgery                                   | Male   | December  |
| Radiotherapy                              | Male   | December  |
| Radiotherapy                              | Female | December  |
| Radiotherapy                              | Male   | December  |
| Radiotherapy                              | Female | December  |
| Radiotherapy                              | Male   | December  |
| Radiotherapy                              | Female | December  |

|              |        |           |
|--------------|--------|-----------|
| Radiotherapy | Male   | December  |
| Radiotherapy | Male   | December  |
| Radiotherapy | Female | December  |
| Radiotherapy | Male   | December  |
| Radiotherapy | Female | December  |
| Radiotherapy | Female | December  |
| Surgery      | Female | June      |
| Surgery      | Male   | June      |
| Surgery      | Male   | June      |
| Surgery      | Male   | June      |
| Surgery      | Female | June      |
| Surgery      | Male   | June      |
| Surgery      | Female | June      |
| Surgery      | Female | June      |
| Surgery      | Female | May       |
| Surgery      | Male   | May       |
| Surgery      | Male   | May       |
| Surgery      | Female | May       |
| Surgery      | Male   | May       |
| Surgery      | Male   | May       |
| Surgery      | Female | May       |
| Surgery      | Female | May       |
| Surgery      | Male   | October   |
| Surgery      | Male   | October   |
| Surgery      | Female | October   |
| Surgery      | Female | October   |
| Surgery      | Male   | October   |
| Surgery      | Female | October   |
| Surgery      | Female | October   |
| Surgery      | Male   | October   |
| Radiotherapy | Male   | September |
| Radiotherapy | Female | September |
| Radiotherapy | Male   | September |
| Radiotherapy | Male   | August    |
| Radiotherapy | Female | August    |
| Radiotherapy | Female | August    |
| Radiotherapy | Male   | August    |
| Radiotherapy | Female | August    |
| Radiotherapy | Male   | August    |
| Radiotherapy | Male   | July      |
| Radiotherapy | Female | July      |
| Radiotherapy | Female | July      |
| Radiotherapy | Male   | July      |
| Radiotherapy | Female | July      |
| Surgery      | Male   | August    |
| Surgery      | Female | August    |
| Surgery      | Female | August    |
| Surgery      | Male   | August    |
| Surgery      | Male   | August    |
| Surgery      | Female | August    |

|         |        |          |
|---------|--------|----------|
| Surgery | Male   | August   |
| Surgery | Female | August   |
| Surgery | Male   | August   |
| Surgery | Female | August   |
| Surgery | Male   | August   |
| Surgery | Female | August   |
| Surgery | Male   | August   |
| Surgery | Male   | August   |
| Surgery | Female | August   |
| Surgery | Female | December |
| Surgery | Male   | December |
| Surgery | Female | December |
| Surgery | Male   | December |
| Surgery | Female | December |
| Surgery | Male   | December |
| Surgery | Female | December |
| Surgery | Male   | December |
| Surgery | Female | December |
| Surgery | Male   | December |
| Surgery | Female | December |
| Surgery | Male   | December |
| Surgery | Female | July     |
| Surgery | Male   | July     |
| Surgery | Male   | July     |
| Surgery | Male   | July     |
| Surgery | Female | July     |
| Surgery | Male   | July     |
| Surgery | Female | July     |
| Surgery | Male   | July     |
| Surgery | Female | July     |
| Surgery | Female | July     |
| Surgery | Male   | July     |
| Surgery | Female | July     |
| Surgery | Male   | July     |
| Surgery | Female | June     |
| Surgery | Male   | June     |
| Surgery | Female | June     |
| Surgery | Male   | June     |
| Surgery | Female | June     |
| Surgery | Male   | June     |
| Surgery | Female | June     |
| Surgery | Male   | June     |
| Surgery | Female | June     |
| Surgery | Male   | June     |
| Surgery | Female | June     |
| Surgery | Male   | June     |
| Surgery | Male   | June     |
| Surgery | Male   | March    |

|         |        |          |
|---------|--------|----------|
| Surgery | Female | March    |
| Surgery | Male   | March    |
| Surgery | Female | March    |
| Surgery | Female | March    |
| Surgery | Female | March    |
| Surgery | Male   | March    |
| Surgery | Male   | March    |
| Surgery | Female | March    |
| Surgery | Male   | March    |
| Surgery | Female | March    |
| Surgery | Female | March    |
| Surgery | Male   | March    |
| Surgery | Male   | March    |
| Surgery | Female | March    |
| Surgery | Female | May      |
| Surgery | Female | May      |
| Surgery | Female | May      |
| Surgery | Male   | May      |
| Surgery | Female | May      |
| Surgery | Male   | May      |
| Surgery | Female | May      |
| Surgery | Female | May      |
| Surgery | Male   | May      |
| Surgery | Male   | May      |
| Surgery | Female | May      |
| Surgery | Female | May      |
| Surgery | Male   | May      |
| Surgery | Male   | November |
| Surgery | Female | November |
| Surgery | Female | November |
| Surgery | Male   | November |
| Surgery | Female | November |
| Surgery | Female | November |
| Surgery | Female | November |
| Surgery | Male   | October  |
| Surgery | Male   | October  |
| Surgery | Female | October  |
| Surgery | Female | October  |
| Surgery | Male   | October  |
| Surgery | Female | October  |
| Surgery | Female | October  |
| Surgery | Male   | October  |
| Surgery | Male   | October  |

|         |        |           |
|---------|--------|-----------|
| Surgery | Male   | October   |
| Surgery | Female | October   |
| Surgery | Female | October   |
| Surgery | Female | October   |
| Surgery | Male   | October   |
| Surgery | Female | October   |
| Surgery | Male   | October   |
| Surgery | Male   | September |
| Surgery | Male   | September |
| Surgery | Male   | September |
| Surgery | Female | September |
| Surgery | Female | September |
| Surgery | Female | September |
| Surgery | Male   | September |
| Surgery | Female | September |
| Surgery | Female | September |
| Surgery | Male   | September |
| Surgery | Male   | September |
| Surgery | Male   | September |
| Surgery | Female | September |
| Surgery | Male   | September |
| Surgery | Female | April     |
| Surgery | Male   | April     |
| Surgery | Male   | April     |
| Surgery | Female | April     |
| Surgery | Female | April     |
| Surgery | Female | April     |
| Surgery | Male   | April     |
| Surgery | Male   | April     |
| Surgery | Male   | April     |
| Surgery | Female | April     |
| Surgery | Female | February  |
| Surgery | Male   | February  |
| Surgery | Female | February  |
| Surgery | Male   | February  |
| Surgery | Female | February  |
| Surgery | Male   | February  |
| Surgery | Female | February  |
| Surgery | Male   | February  |
| Surgery | Female | February  |
| Surgery | Male   | February  |
| Surgery | Female | February  |
| Surgery | Female | February  |
| Surgery | Male   | February  |
| Surgery | Male   | January   |
| Surgery | Female | January   |
| Surgery | Male   | January   |
| Surgery | Female | January   |
| Surgery | Female | January   |
| Surgery | Male   | January   |

|         |        |         |
|---------|--------|---------|
| Surgery | Female | January |
| Surgery | Male   | January |
| Surgery | Female | January |
| Surgery | Female | January |
| Surgery | Male   | January |
| Surgery | Male   | January |
| Surgery | Female | January |
| Surgery | Male   | July    |
| Surgery | Female | July    |
| Surgery | Female | July    |
| Surgery | Male   | July    |
| Surgery | Female | July    |
| Surgery | Male   | July    |
| Surgery | Female | July    |
| Surgery | Female | July    |
| Surgery | Male   | July    |
| Surgery | Female | July    |
| Surgery | Male   | July    |
| Surgery | Male   | June    |
| Surgery | Male   | June    |
| Surgery | Male   | June    |
| Surgery | Female | June    |
| Surgery | Male   | June    |
| Surgery | Female | June    |
| Surgery | Male   | June    |
| Surgery | Male   | June    |
| Surgery | Female | June    |
| Surgery | Male   | May     |
| Surgery | Female | May     |
| Surgery | Male   | May     |
| Surgery | Male   | May     |
| Surgery | Male   | May     |
| Surgery | Female | May     |
| Surgery | Female | May     |
| Surgery | Male   | May     |
| Surgery | Male   | October |
| Surgery | Female | October |
| Surgery | Male   | October |
| Surgery | Male   | October |

|              |        |          |
|--------------|--------|----------|
| Surgery      | Male   | October  |
| Surgery      | Female | October  |
| Surgery      | Male   | October  |
| Radiotherapy | Female | April    |
| Radiotherapy | Male   | April    |
| Radiotherapy | Female | April    |
| Radiotherapy | Male   | April    |
| Radiotherapy | Female | April    |
| Radiotherapy | Male   | April    |
| Radiotherapy | Female | April    |
| Radiotherapy | Male   | April    |
| Radiotherapy | Male   | April    |
| Radiotherapy | Female | April    |
| Radiotherapy | Male   | April    |
| Radiotherapy | Male   | April    |
| Radiotherapy | Female | April    |
| Radiotherapy | Female | April    |
| Radiotherapy | Female | December |
| Radiotherapy | Female | December |
| Radiotherapy | Male   | December |
| Radiotherapy | Female | December |
| Radiotherapy | Male   | December |
| Radiotherapy | Female | December |
| Radiotherapy | Male   | December |
| Radiotherapy | Female | December |
| Radiotherapy | Male   | December |
| Radiotherapy | Female | February |
| Radiotherapy | Male   | February |
| Radiotherapy | Female | February |
| Radiotherapy | Male   | February |
| Radiotherapy | Female | February |
| Radiotherapy | Male   | February |
| Radiotherapy | Male   | February |
| Radiotherapy | Female | February |
| Radiotherapy | Female | February |
| Radiotherapy | Male   | February |
| Radiotherapy | Male   | February |
| Radiotherapy | Male   | February |
| Radiotherapy | Female | February |
| Radiotherapy | Female | February |
| Radiotherapy | Male   | February |
| Radiotherapy | Female | February |
| Radiotherapy | Female | January  |
| Radiotherapy | Female | January  |
| Radiotherapy | Male   | January  |
| Radiotherapy | Male   | January  |
| Radiotherapy | Male   | January  |
| Radiotherapy | Female | January  |

|              |        |         |
|--------------|--------|---------|
| Radiotherapy | Male   | January |
| Radiotherapy | Female | January |
| Radiotherapy | Male   | January |
| Radiotherapy | Male   | January |
| Radiotherapy | Male   | January |
| Radiotherapy | Female | June    |
| Radiotherapy | Male   | June    |
| Radiotherapy | Male   | June    |
| Radiotherapy | Female | June    |
| Radiotherapy | Female | June    |
| Radiotherapy | Female | June    |
| Radiotherapy | Male   | June    |
| Radiotherapy | Female | June    |
| Radiotherapy | Female | June    |
| Radiotherapy | Male   | June    |
| Radiotherapy | Female | June    |
| Radiotherapy | Male   | June    |
| Radiotherapy | Male   | June    |
| Radiotherapy | Male   | March   |
| Radiotherapy | Female | March   |
| Radiotherapy | Male   | March   |
| Radiotherapy | Female | March   |
| Radiotherapy | Male   | March   |
| Radiotherapy | Female | March   |
| Radiotherapy | Female | March   |
| Radiotherapy | Male   | March   |
| Radiotherapy | Male   | March   |
| Radiotherapy | Female | March   |
| Radiotherapy | Male   | March   |
| Radiotherapy | Female | March   |
| Radiotherapy | Male   | March   |
| Radiotherapy | Female | March   |
| Radiotherapy | Male   | March   |
| Radiotherapy | Female | March   |
| Radiotherapy | Male   | May     |
| Radiotherapy | Male   | May     |
| Radiotherapy | Female | May     |
| Radiotherapy | Male   | May     |
| Radiotherapy | Male   | May     |
| Radiotherapy | Female | May     |
| Radiotherapy | Female | May     |
| Radiotherapy | Male   | May     |
| Radiotherapy | Male   | May     |
| Radiotherapy | Female | May     |
| Radiotherapy | Male   | May     |
| Radiotherapy | Female | May     |

|                                |        |           |
|--------------------------------|--------|-----------|
| Radiotherapy                   | Male   | May       |
| Radiotherapy                   | Male   | May       |
| Radiotherapy                   | Female | May       |
| Radiotherapy                   | Male   | November  |
| Radiotherapy                   | Female | November  |
| Radiotherapy                   | Male   | November  |
| Radiotherapy                   | Male   | November  |
| Radiotherapy                   | Female | November  |
| Radiotherapy                   | Male   | November  |
| Radiotherapy                   | Female | November  |
| Radiotherapy                   | Female | November  |
| Radiotherapy                   | Male   | November  |
| Radiotherapy                   | Female | November  |
| Radiotherapy                   | Female | November  |
| Radiotherapy                   | Male   | October   |
| Radiotherapy                   | Male   | October   |
| Radiotherapy                   | Female | October   |
| Radiotherapy                   | Female | October   |
| Radiotherapy                   | Male   | October   |
| Radiotherapy                   | Male   | October   |
| Radiotherapy                   | Male   | October   |
| Radiotherapy                   | Female | October   |
| Radiotherapy                   | Female | October   |
| Radiotherapy                   | Female | October   |
| Radiotherapy                   | Male   | October   |
| Radiotherapy                   | Female | September |
| Radiotherapy                   | Male   | September |
| Radiotherapy                   | Female | September |
| Radiotherapy                   | Female | September |
| Radiotherapy                   | Male   | September |
| Radiotherapy                   | Female | September |
| Radiotherapy                   | Female | September |
| Radiotherapy                   | Male   | September |
| Radiotherapy                   | Female | September |
| Radiotherapy                   | Male   | September |
| Radiotherapy                   | Female | September |
| Hormonal or Targeted therapies | Female | April     |
| Hormonal or Targeted therapies | Female | April     |
| Hormonal or Targeted therapies | Male   | April     |
| Hormonal or Targeted therapies | Male   | April     |
| Hormonal or Targeted therapies | Female | April     |
| Hormonal or Targeted therapies | Male   | April     |
| Hormonal or Targeted therapies | Male   | April     |
| Hormonal or Targeted therapies | Male   | April     |
| Hormonal or Targeted therapies | Female | April     |
| Hormonal or Targeted therapies | Male   | April     |
| Hormonal or Targeted therapies | Female | April     |
| Hormonal or Targeted therapies | Male   | April     |
| Hormonal or Targeted therapies | Male   | August    |

[illegible]

[illegible]

[illegible]

[illegible]

[illegible]

[illegible]

|                                |        |           |
|--------------------------------|--------|-----------|
| Hormonal or Targeted therapies | Female | July      |
| Hormonal or Targeted therapies | Male   | July      |
| Hormonal or Targeted therapies | Male   | July      |
| Hormonal or Targeted therapies | Female | July      |
| Hormonal or Targeted therapies | Male   | July      |
| Hormonal or Targeted therapies | Male   | June      |
| Hormonal or Targeted therapies | Female | June      |
| Hormonal or Targeted therapies | Female | June      |
| Hormonal or Targeted therapies | Female | June      |
| Hormonal or Targeted therapies | Female | June      |
| Hormonal or Targeted therapies | Male   | June      |
| Hormonal or Targeted therapies | Female | June      |
| Hormonal or Targeted therapies | Male   | June      |
| Hormonal or Targeted therapies | Female | June      |
| Hormonal or Targeted therapies | Male   | June      |
| Hormonal or Targeted therapies | Male   | June      |
| Hormonal or Targeted therapies | Female | March     |
| Hormonal or Targeted therapies | Male   | March     |
| Hormonal or Targeted therapies | Female | March     |
| Hormonal or Targeted therapies | Female | March     |
| Hormonal or Targeted therapies | Female | March     |
| Hormonal or Targeted therapies | Male   | March     |
| Hormonal or Targeted therapies | Male   | May       |
| Hormonal or Targeted therapies | Female | May       |
| Hormonal or Targeted therapies | Female | May       |
| Hormonal or Targeted therapies | Male   | May       |
| Hormonal or Targeted therapies | Female | May       |
| Hormonal or Targeted therapies | Male   | November  |
| Hormonal or Targeted therapies | Female | November  |
| Hormonal or Targeted therapies | Female | November  |
| Hormonal or Targeted therapies | Female | November  |
| Hormonal or Targeted therapies | Female | November  |
| Hormonal or Targeted therapies | Female | November  |
| Hormonal or Targeted therapies | Male   | October   |
| Hormonal or Targeted therapies | Male   | October   |
| Hormonal or Targeted therapies | Female | October   |
| Hormonal or Targeted therapies | Male   | October   |
| Hormonal or Targeted therapies | Female | October   |
| Hormonal or Targeted therapies | Male   | September |
| Hormonal or Targeted therapies | Female | September |
| Hormonal or Targeted therapies | Male   | September |
| Hormonal or Targeted therapies | Male   | September |
| Chemotherapy                   | Male   | April     |
| Chemotherapy                   | Male   | April     |
| Chemotherapy                   | Male   | August    |
| Chemotherapy                   | Female | August    |
| Chemotherapy                   | Male   | August    |
| Chemotherapy                   | Female | August    |

|              |        |           |
|--------------|--------|-----------|
| Chemotherapy | Male   | August    |
| Chemotherapy | Male   | December  |
| Chemotherapy | Female | December  |
| Chemotherapy | Male   | January   |
| Chemotherapy | Female | July      |
| Chemotherapy | Male   | July      |
| Chemotherapy | Male   | July      |
| Chemotherapy | Female | July      |
| Chemotherapy | Female | July      |
| Chemotherapy | Male   | July      |
| Chemotherapy | Male   | June      |
| Chemotherapy | Female | June      |
| Chemotherapy | Male   | June      |
| Chemotherapy | Female | June      |
| Chemotherapy | Male   | June      |
| Chemotherapy | Female | March     |
| Chemotherapy | Female | March     |
| Chemotherapy | Male   | March     |
| Chemotherapy | Male   | March     |
| Chemotherapy | Male   | March     |
| Chemotherapy | Female | May       |
| Chemotherapy | Male   | May       |
| Chemotherapy | Male   | May       |
| Chemotherapy | Female | May       |
| Chemotherapy | Male   | May       |
| Chemotherapy | Female | May       |
| Chemotherapy | Female | May       |
| Chemotherapy | Male   | May       |
| Chemotherapy | Female | November  |
| Chemotherapy | Male   | November  |
| Chemotherapy | Male   | November  |
| Chemotherapy | Female | October   |
| Chemotherapy | Male   | October   |
| Chemotherapy | Male   | October   |
| Chemotherapy | Male   | September |
| Chemotherapy | Female | April     |
| Chemotherapy | Male   | April     |
| Chemotherapy | Male   | April     |
| Chemotherapy | Female | April     |
| Chemotherapy | Female | August    |
| Chemotherapy | Male   | August    |
| Chemotherapy | Female | August    |
| Chemotherapy | Female | August    |
| Chemotherapy | Female | August    |
| Chemotherapy | Male   | August    |
| Chemotherapy | Male   | August    |
| Chemotherapy | Female | December  |

|              |        |           |
|--------------|--------|-----------|
| Chemotherapy | Female | December  |
| Chemotherapy | Male   | December  |
| Chemotherapy | Male   | January   |
| Chemotherapy | Female | July      |
| Chemotherapy | Female | July      |
| Chemotherapy | Male   | July      |
| Chemotherapy | Female | July      |
| Chemotherapy | Female | July      |
| Chemotherapy | Male   | July      |
| Chemotherapy | Male   | June      |
| Chemotherapy | Female | June      |
| Chemotherapy | Female | June      |
| Chemotherapy | Male   | June      |
| Chemotherapy | Male   | March     |
| Chemotherapy | Female | March     |
| Chemotherapy | Male   | March     |
| Chemotherapy | Female | March     |
| Chemotherapy | Female | May       |
| Chemotherapy | Male   | May       |
| Chemotherapy | Female | May       |
| Chemotherapy | Female | May       |
| Chemotherapy | Female | May       |
| Chemotherapy | Male   | May       |
| Chemotherapy | Female | May       |
| Chemotherapy | Male   | May       |
| Chemotherapy | Female | November  |
| Chemotherapy | Female | November  |
| Chemotherapy | Male   | November  |
| Chemotherapy | Male   | November  |
| Chemotherapy | Female | November  |
| Chemotherapy | Female | October   |
| Chemotherapy | Male   | October   |
| Chemotherapy | Male   | October   |
| Chemotherapy | Female | October   |
| Chemotherapy | Female | September |
| Chemotherapy | Male   | September |
| Chemotherapy | Female | September |
| Chemotherapy | Male   | September |
| Chemotherapy | Female | September |
| Chemotherapy | Male   | September |
| Chemotherapy | Female | April     |
| Chemotherapy | Female | April     |
| Chemotherapy | Male   | April     |
| Chemotherapy | Female | April     |
| Chemotherapy | Female | April     |
| Chemotherapy | Male   | April     |
| Chemotherapy | Female | April     |

|              |        |          |
|--------------|--------|----------|
| Chemotherapy | Female | April    |
| Chemotherapy | Female | April    |
| Chemotherapy | Male   | April    |
| Chemotherapy | Female | April    |
| Chemotherapy | Female | August   |
| Chemotherapy | Female | August   |
| Chemotherapy | Male   | August   |
| Chemotherapy | Female | August   |
| Chemotherapy | Female | August   |
| Chemotherapy | Male   | August   |
| Chemotherapy | Male   | August   |
| Chemotherapy | Female | August   |
| Chemotherapy | Male   | August   |
| Chemotherapy | Female | August   |
| Chemotherapy | Male   | December |
| Chemotherapy | Female | December |
| Chemotherapy | Female | December |
| Chemotherapy | Male   | December |
| Chemotherapy | Female | December |
| Chemotherapy | Male   | December |
| Chemotherapy | Female | February |
| Chemotherapy | Male   | February |
| Chemotherapy | Female | January  |
| Chemotherapy | Female | January  |
| Chemotherapy | Male   | January  |
| Chemotherapy | Female | January  |
| Chemotherapy | Female | July     |
| Chemotherapy | Male   | July     |
| Chemotherapy | Female | July     |
| Chemotherapy | Male   | July     |
| Chemotherapy | Male   | July     |
| Chemotherapy | Female | July     |
| Chemotherapy | Male   | July     |
| Chemotherapy | Female | July     |
| Chemotherapy | Female | June     |
| Chemotherapy | Female | June     |

|              |        |          |
|--------------|--------|----------|
| Chemotherapy | Male   | June     |
| Chemotherapy | Male   | June     |
| Chemotherapy | Female | June     |
| Chemotherapy | Female | June     |
| Chemotherapy | Male   | June     |
| Chemotherapy | Male   | June     |
| Chemotherapy | Female | June     |
| Chemotherapy | Male   | March    |
| Chemotherapy | Female | March    |
| Chemotherapy | Male   | March    |
| Chemotherapy | Female | March    |
| Chemotherapy | Female | March    |
| Chemotherapy | Female | March    |
| Chemotherapy | Male   | March    |
| Chemotherapy | Female | March    |
| Chemotherapy | Female | March    |
| Chemotherapy | Male   | March    |
| Chemotherapy | Male   | May      |
| Chemotherapy | Female | May      |
| Chemotherapy | Female | May      |
| Chemotherapy | Female | May      |
| Chemotherapy | Male   | May      |
| Chemotherapy | Female | May      |
| Chemotherapy | Female | May      |
| Chemotherapy | Male   | May      |
| Chemotherapy | Female | May      |
| Chemotherapy | Female | May      |
| Chemotherapy | Female | May      |
| Chemotherapy | Male   | May      |
| Chemotherapy | Female | November |
| Chemotherapy | Male   | November |
| Chemotherapy | Male   | November |
| Chemotherapy | Male   | November |
| Chemotherapy | Female | October  |
| Chemotherapy | Female | October  |
| Chemotherapy | Male   | October  |
| Chemotherapy | Male   | October  |
| Chemotherapy | Female | October  |
| Chemotherapy | Male   | October  |
| Chemotherapy | Female | October  |
| Chemotherapy | Female | October  |
| Chemotherapy | Female | October  |
| Chemotherapy | Male   | October  |
| Chemotherapy | Female | October  |
| Chemotherapy | Female | October  |

|              |        |           |
|--------------|--------|-----------|
| Chemotherapy | Male   | September |
| Chemotherapy | Male   | September |
| Chemotherapy | Female | September |
| Chemotherapy | Female | September |
| Chemotherapy | Male   | September |
| Chemotherapy | Female | September |
| Chemotherapy | Female | September |
| Chemotherapy | Female | September |
| Chemotherapy | Male   | September |
| Chemotherapy | Female | September |
| Chemotherapy | Female | September |
| Chemotherapy | Female | September |
| Chemotherapy | Male   | September |
| Chemotherapy | Female | April     |
| Chemotherapy | Male   | April     |
| Chemotherapy | Female | April     |
| Chemotherapy | Male   | April     |
| Chemotherapy | Female | April     |
| Chemotherapy | Male   | April     |
| Chemotherapy | Female | April     |
| Chemotherapy | Female | April     |
| Chemotherapy | Female | April     |
| Chemotherapy | Male   | April     |
| Chemotherapy | Female | August    |
| Chemotherapy | Male   | August    |
| Chemotherapy | Male   | August    |
| Chemotherapy | Female | August    |
| Chemotherapy | Female | August    |
| Chemotherapy | Male   | August    |
| Chemotherapy | Female | August    |
| Chemotherapy | Female | August    |
| Chemotherapy | Male   | August    |
| Chemotherapy | Female | August    |
| Chemotherapy | Male   | August    |
| Chemotherapy | Female | August    |
| Chemotherapy | Female | August    |
| Chemotherapy | Male   | December  |
| Chemotherapy | Female | December  |
| Chemotherapy | Male   | December  |
| Chemotherapy | Female | December  |
| Chemotherapy | Male   | December  |
| Chemotherapy | Male   | December  |
| Chemotherapy | Female | December  |
| Chemotherapy | Male   | December  |
| Chemotherapy | Female | December  |
| Chemotherapy | Female | December  |
| Chemotherapy | Female | December  |
| Chemotherapy | Male   | December  |

|              |        |          |
|--------------|--------|----------|
| Chemotherapy | Male   | February |
| Chemotherapy | Female | February |
| Chemotherapy | Male   | February |
| Chemotherapy | Female | February |
| Chemotherapy | Female | January  |
| Chemotherapy | Female | January  |
| Chemotherapy | Male   | January  |
| Chemotherapy | Female | January  |
| Chemotherapy | Male   | January  |
| Chemotherapy | Female | January  |
| Chemotherapy | Female | January  |
| Chemotherapy | Male   | January  |
| Chemotherapy | Female | January  |
| Chemotherapy | Female | January  |
| Chemotherapy | Female | July     |
| Chemotherapy | Female | July     |
| Chemotherapy | Male   | July     |
| Chemotherapy | Female | July     |
| Chemotherapy | Female | July     |
| Chemotherapy | Male   | July     |
| Chemotherapy | Male   | July     |
| Chemotherapy | Female | July     |
| Chemotherapy | Female | July     |
| Chemotherapy | Male   | July     |
| Chemotherapy | Male   | July     |
| Chemotherapy | Male   | July     |
| Chemotherapy | Female | July     |
| Chemotherapy | Female | June     |
| Chemotherapy | Male   | June     |
| Chemotherapy | Female | June     |
| Chemotherapy | Female | June     |
| Chemotherapy | Female | June     |
| Chemotherapy | Male   | June     |
| Chemotherapy | Female | June     |
| Chemotherapy | Female | June     |
| Chemotherapy | Female | June     |
| Chemotherapy | Male   | June     |
| Chemotherapy | Female | June     |
| Chemotherapy | Female | June     |
| Chemotherapy | Female | June     |
| Chemotherapy | Male   | June     |
| Chemotherapy | Female | March    |
| Chemotherapy | Male   | March    |
| Chemotherapy | Female | March    |
| Chemotherapy | Male   | March    |
| Chemotherapy | Male   | March    |
| Chemotherapy | Female | March    |

|              |        |           |
|--------------|--------|-----------|
| Chemotherapy | Female | March     |
| Chemotherapy | Male   | March     |
| Chemotherapy | Female | March     |
| Chemotherapy | Female | May       |
| Chemotherapy | Male   | May       |
| Chemotherapy | Female | May       |
| Chemotherapy | Male   | May       |
| Chemotherapy | Female | May       |
| Chemotherapy | Female | May       |
| Chemotherapy | Female | May       |
| Chemotherapy | Male   | May       |
| Chemotherapy | Female | May       |
| Chemotherapy | Male   | May       |
| Chemotherapy | Female | May       |
| Chemotherapy | Male   | May       |
| Chemotherapy | Female | May       |
| Chemotherapy | Female | May       |
| Chemotherapy | Female | November  |
| Chemotherapy | Male   | November  |
| Chemotherapy | Female | November  |
| Chemotherapy | Female | November  |
| Chemotherapy | Female | November  |
| Chemotherapy | Male   | November  |
| Chemotherapy | Female | November  |
| Chemotherapy | Female | November  |
| Chemotherapy | Male   | November  |
| Chemotherapy | Female | November  |
| Chemotherapy | Male   | October   |
| Chemotherapy | Female | October   |
| Chemotherapy | Male   | October   |
| Chemotherapy | Female | October   |
| Chemotherapy | Male   | October   |
| Chemotherapy | Female | October   |
| Chemotherapy | Female | October   |
| Chemotherapy | Female | October   |
| Chemotherapy | Male   | October   |
| Chemotherapy | Female | October   |
| Chemotherapy | Female | October   |
| Chemotherapy | Male   | October   |
| Chemotherapy | Female | October   |
| Chemotherapy | Female | October   |
| Chemotherapy | Male   | October   |
| Chemotherapy | Male   | September |
| Chemotherapy | Female | September |

|              |        |           |
|--------------|--------|-----------|
| Chemotherapy | Male   | September |
| Chemotherapy | Female | September |
| Chemotherapy | Female | September |
| Chemotherapy | Male   | September |
| Chemotherapy | Female | September |
| Chemotherapy | Male   | September |
| Chemotherapy | Female | September |
| Chemotherapy | Male   | September |
| Chemotherapy | Female | September |
| Chemotherapy | Male   | September |
| Chemotherapy | Female | September |
| Chemotherapy | Female | September |
| Chemotherapy | Female | September |
| Chemotherapy | Male   | September |
| Chemotherapy | Male   | April     |
| Chemotherapy | Female | April     |
| Chemotherapy | Male   | April     |
| Chemotherapy | Female | April     |
| Chemotherapy | Male   | April     |
| Chemotherapy | Female | April     |
| Chemotherapy | Male   | April     |
| Chemotherapy | Female | April     |
| Chemotherapy | Male   | April     |
| Chemotherapy | Male   | April     |
| Chemotherapy | Male   | April     |
| Chemotherapy | Female | April     |
| Chemotherapy | Female | April     |
| Chemotherapy | Female | April     |
| Chemotherapy | Male   | April     |
| Chemotherapy | Male   | August    |
| Chemotherapy | Male   | August    |
| Chemotherapy | Male   | August    |
| Chemotherapy | Female | August    |
| Chemotherapy | Male   | August    |
| Chemotherapy | Female | August    |
| Chemotherapy | Female | August    |
| Chemotherapy | Male   | August    |
| Chemotherapy | Male   | August    |
| Chemotherapy | Female | August    |
| Chemotherapy | Male   | August    |
| Chemotherapy | Female | August    |
| Chemotherapy | Female | August    |
| Chemotherapy | Male   | August    |
| Chemotherapy | Female | December  |
| Chemotherapy | Male   | December  |
| Chemotherapy | Male   | December  |
| Chemotherapy | Female | December  |
| Chemotherapy | Male   | December  |
| Chemotherapy | Male   | December  |

|              |        |          |
|--------------|--------|----------|
| Chemotherapy | Female | December |
| Chemotherapy | Male   | December |
| Chemotherapy | Female | December |
| Chemotherapy | Male   | December |
| Chemotherapy | Female | December |
| Chemotherapy | Male   | February |
| Chemotherapy | Male   | February |
| Chemotherapy | Female | February |
| Chemotherapy | Male   | February |
| Chemotherapy | Female | February |
| Chemotherapy | Female | February |
| Chemotherapy | Male   | February |
| Chemotherapy | Male   | February |
| Chemotherapy | Female | February |
| Chemotherapy | Female | February |
| Chemotherapy | Male   | January  |
| Chemotherapy | Female | January  |
| Chemotherapy | Male   | January  |
| Chemotherapy | Female | January  |
| Chemotherapy | Female | January  |
| Chemotherapy | Male   | January  |
| Chemotherapy | Male   | January  |
| Chemotherapy | Male   | January  |
| Chemotherapy | Female | January  |
| Chemotherapy | Male   | January  |
| Chemotherapy | Male   | January  |
| Chemotherapy | Female | July     |
| Chemotherapy | Male   | July     |
| Chemotherapy | Female | July     |
| Chemotherapy | Male   | July     |
| Chemotherapy | Male   | July     |
| Chemotherapy | Female | July     |
| Chemotherapy | Male   | July     |
| Chemotherapy | Male   | July     |
| Chemotherapy | Female | July     |
| Chemotherapy | Male   | July     |
| Chemotherapy | Female | July     |
| Chemotherapy | Male   | July     |
| Chemotherapy | Male   | June     |
| Chemotherapy | Female | June     |
| Chemotherapy | Male   | June     |
| Chemotherapy | Female | June     |
| Chemotherapy | Male   | June     |
| Chemotherapy | Female | June     |
| Chemotherapy | Male   | June     |
| Chemotherapy | Male   | June     |
| Chemotherapy | Male   | June     |
| Chemotherapy | Female | June     |
| Chemotherapy | Male   | June     |
| Chemotherapy | Male   | June     |

|              |        |          |
|--------------|--------|----------|
| Chemotherapy | Female | June     |
| Chemotherapy | Female | March    |
| Chemotherapy | Male   | March    |
| Chemotherapy | Female | March    |
| Chemotherapy | Male   | March    |
| Chemotherapy | Female | March    |
| Chemotherapy | Male   | March    |
| Chemotherapy | Male   | March    |
| Chemotherapy | Female | March    |
| Chemotherapy | Male   | March    |
| Chemotherapy | Female | March    |
| Chemotherapy | Male   | March    |
| Chemotherapy | Female | March    |
| Chemotherapy | Male   | March    |
| Chemotherapy | Female | March    |
| Chemotherapy | Male   | March    |
| Chemotherapy | Female | March    |
| Chemotherapy | Male   | March    |
| Chemotherapy | Male   | May      |
| Chemotherapy | Male   | May      |
| Chemotherapy | Female | May      |
| Chemotherapy | Male   | May      |
| Chemotherapy | Female | May      |
| Chemotherapy | Male   | May      |
| Chemotherapy | Male   | May      |
| Chemotherapy | Female | May      |
| Chemotherapy | Male   | May      |
| Chemotherapy | Female | May      |
| Chemotherapy | Male   | May      |
| Chemotherapy | Male   | November |
| Chemotherapy | Female | November |
| Chemotherapy | Female | November |
| Chemotherapy | Male   | November |
| Chemotherapy | Male   | November |
| Chemotherapy | Female | November |
| Chemotherapy | Female | November |
| Chemotherapy | Male   | November |
| Chemotherapy | Male   | November |
| Chemotherapy | Female | November |
| Chemotherapy | Female | October  |
| Chemotherapy | Male   | October  |
| Chemotherapy | Male   | October  |
| Chemotherapy | Female | October  |
| Chemotherapy | Male   | October  |
| Chemotherapy | Female | October  |
| Chemotherapy | Male   | October  |

|              |        |           |
|--------------|--------|-----------|
| Chemotherapy | Male   | October   |
| Chemotherapy | Female | October   |
| Chemotherapy | Male   | October   |
| Chemotherapy | Male   | October   |
| Chemotherapy | Male   | September |
| Chemotherapy | Female | September |
| Chemotherapy | Female | September |
| Chemotherapy | Male   | September |
| Chemotherapy | Male   | September |
| Chemotherapy | Female | September |
| Chemotherapy | Female | September |
| Chemotherapy | Male   | September |
| Chemotherapy | Male   | September |
| Chemotherapy | Male   | September |
| Chemotherapy | Female | September |
| Chemotherapy | Female | September |
| Chemotherapy | Male   | September |
| Chemotherapy | Male   | April     |
| Chemotherapy | Female | April     |
| Chemotherapy | Female | April     |
| Chemotherapy | Female | April     |
| Chemotherapy | Male   | April     |
| Chemotherapy | Female | April     |
| Chemotherapy | Male   | April     |
| Chemotherapy | Male   | April     |
| Chemotherapy | Female | April     |
| Chemotherapy | Female | April     |
| Chemotherapy | Male   | April     |
| Chemotherapy | Female | April     |
| Chemotherapy | Male   | April     |
| Chemotherapy | Female | April     |
| Chemotherapy | Female | August    |
| Chemotherapy | Male   | August    |
| Chemotherapy | Female | August    |
| Chemotherapy | Female | August    |
| Chemotherapy | Male   | August    |
| Chemotherapy | Male   | August    |
| Chemotherapy | Male   | August    |
| Chemotherapy | Female | August    |
| Chemotherapy | Female | August    |
| Chemotherapy | Female | August    |
| Chemotherapy | Male   | August    |
| Chemotherapy | Female | August    |
| Chemotherapy | Male   | August    |
| Chemotherapy | Male   | December  |
| Chemotherapy | Male   | December  |

|              |        |          |
|--------------|--------|----------|
| Chemotherapy | Female | December |
| Chemotherapy | Male   | December |
| Chemotherapy | Male   | December |
| Chemotherapy | Male   | December |
| Chemotherapy | Female | December |
| Chemotherapy | Female | December |
| Chemotherapy | Female | December |
| Chemotherapy | Male   | December |
| Chemotherapy | Male   | February |
| Chemotherapy | Female | February |
| Chemotherapy | Female | February |
| Chemotherapy | Male   | February |
| Chemotherapy | Female | February |
| Chemotherapy | Female | February |
| Chemotherapy | Male   | February |
| Chemotherapy | Male   | February |
| Chemotherapy | Female | February |
| Chemotherapy | Female | February |
| Chemotherapy | Female | February |
| Chemotherapy | Male   | February |
| Chemotherapy | Male   | January  |
| Chemotherapy | Male   | January  |
| Chemotherapy | Female | January  |
| Chemotherapy | Female | January  |
| Chemotherapy | Male   | January  |
| Chemotherapy | Male   | January  |
| Chemotherapy | Male   | January  |
| Chemotherapy | Female | January  |
| Chemotherapy | Male   | January  |
| Chemotherapy | Male   | January  |
| Chemotherapy | Female | July     |
| Chemotherapy | Male   | July     |
| Chemotherapy | Female | July     |
| Chemotherapy | Male   | July     |
| Chemotherapy | Female | July     |
| Chemotherapy | Male   | July     |
| Chemotherapy | Female | July     |
| Chemotherapy | Male   | July     |
| Chemotherapy | Female | July     |
| Chemotherapy | Female | July     |
| Chemotherapy | Male   | July     |
| Chemotherapy | Female | July     |
| Chemotherapy | Female | July     |
| Chemotherapy | Male   | July     |

|              |        |       |
|--------------|--------|-------|
| Chemotherapy | Male   | July  |
| Chemotherapy | Female | July  |
| Chemotherapy | Male   | July  |
| Chemotherapy | Male   | June  |
| Chemotherapy | Female | June  |
| Chemotherapy | Male   | June  |
| Chemotherapy | Female | June  |
| Chemotherapy | Female | June  |
| Chemotherapy | Male   | June  |
| Chemotherapy | Male   | June  |
| Chemotherapy | Female | June  |
| Chemotherapy | Female | June  |
| Chemotherapy | Male   | June  |
| Chemotherapy | Female | June  |
| Chemotherapy | Male   | June  |
| Chemotherapy | Male   | June  |
| Chemotherapy | Female | June  |
| Chemotherapy | Male   | June  |
| Chemotherapy | Female | June  |
| Chemotherapy | Male   | March |
| Chemotherapy | Female | March |
| Chemotherapy | Male   | March |
| Chemotherapy | Female | March |
| Chemotherapy | Female | March |
| Chemotherapy | Male   | March |
| Chemotherapy | Male   | March |
| Chemotherapy | Female | March |
| Chemotherapy | Female | March |
| Chemotherapy | Female | March |
| Chemotherapy | Male   | March |
| Chemotherapy | Female | March |
| Chemotherapy | Male   | May   |
| Chemotherapy | Male   | May   |
| Chemotherapy | Male   | May   |
| Chemotherapy | Female | May   |
| Chemotherapy | Male   | May   |
| Chemotherapy | Female | May   |
| Chemotherapy | Male   | May   |
| Chemotherapy | Male   | May   |
| Chemotherapy | Female | May   |
| Chemotherapy | Male   | May   |
| Chemotherapy | Female | May   |
| Chemotherapy | Male   | May   |
| Chemotherapy | Female | May   |

|              |        |           |
|--------------|--------|-----------|
| Chemotherapy | Female | November  |
| Chemotherapy | Male   | November  |
| Chemotherapy | Female | November  |
| Chemotherapy | Male   | November  |
| Chemotherapy | Female | November  |
| Chemotherapy | Male   | November  |
| Chemotherapy | Male   | November  |
| Chemotherapy | Female | November  |
| Chemotherapy | Female | November  |
| Chemotherapy | Male   | November  |
| Chemotherapy | Female | November  |
| Chemotherapy | Male   | November  |
| Chemotherapy | Female | November  |
| Chemotherapy | Male   | November  |
| Chemotherapy | Female | November  |
| Chemotherapy | Male   | October   |
| Chemotherapy | Female | October   |
| Chemotherapy | Male   | October   |
| Chemotherapy | Female | October   |
| Chemotherapy | Female | October   |
| Chemotherapy | Male   | October   |
| Chemotherapy | Female | October   |
| Chemotherapy | Female | October   |
| Chemotherapy | Male   | October   |
| Chemotherapy | Female | October   |
| Chemotherapy | Male   | October   |
| Chemotherapy | Female | October   |
| Chemotherapy | Female | October   |
| Chemotherapy | Male   | October   |
| Chemotherapy | Female | October   |
| Chemotherapy | Male   | October   |
| Chemotherapy | Male   | September |
| Chemotherapy | Female | September |
| Chemotherapy | Female | September |
| Chemotherapy | Female | September |
| Chemotherapy | Male   | September |
| Chemotherapy | Male   | September |
| Chemotherapy | Female | September |
| Chemotherapy | Male   | September |
| Chemotherapy | Female | September |
| Chemotherapy | Male   | September |
| Chemotherapy | Female | September |
| Chemotherapy | Male   | September |
| Chemotherapy | Male   | September |
| Chemotherapy | Male   | September |
| Chemotherapy | Female | September |
| Chemotherapy | Female | April     |
| Chemotherapy | Male   | April     |

|              |        |          |
|--------------|--------|----------|
| Chemotherapy | Female | April    |
| Chemotherapy | Male   | April    |
| Chemotherapy | Female | April    |
| Chemotherapy | Male   | April    |
| Chemotherapy | Female | April    |
| Chemotherapy | Male   | April    |
| Chemotherapy | Female | April    |
| Chemotherapy | Male   | April    |
| Chemotherapy | Female | April    |
| Chemotherapy | Male   | April    |
| Chemotherapy | Female | April    |
| Chemotherapy | Female | April    |
| Chemotherapy | Male   | April    |
| Chemotherapy | Male   | August   |
| Chemotherapy | Female | August   |
| Chemotherapy | Female | August   |
| Chemotherapy | Male   | August   |
| Chemotherapy | Female | August   |
| Chemotherapy | Male   | August   |
| Chemotherapy | Female | August   |
| Chemotherapy | Male   | August   |
| Chemotherapy | Male   | August   |
| Chemotherapy | Male   | August   |
| Chemotherapy | Female | December |
| Chemotherapy | Male   | December |
| Chemotherapy | Male   | December |
| Chemotherapy | Female | December |
| Chemotherapy | Male   | December |
| Chemotherapy | Male   | December |
| Chemotherapy | Female | December |
| Chemotherapy | Male   | December |
| Chemotherapy | Female | December |
| Chemotherapy | Female | December |
| Chemotherapy | Male   | December |
| Chemotherapy | Male   | December |
| Chemotherapy | Male   | December |
| Chemotherapy | Female | February |
| Chemotherapy | Male   | February |
| Chemotherapy | Female | February |
| Chemotherapy | Male   | February |
| Chemotherapy | Female | February |
| Chemotherapy | Male   | February |
| Chemotherapy | Male   | February |
| Chemotherapy | Female | February |
| Chemotherapy | Female | February |
| Chemotherapy | Male   | February |

|              |        |          |
|--------------|--------|----------|
| Chemotherapy | Female | February |
| Chemotherapy | Male   | February |
| Chemotherapy | Female | February |
| Chemotherapy | Male   | January  |
| Chemotherapy | Female | January  |
| Chemotherapy | Female | January  |
| Chemotherapy | Male   | January  |
| Chemotherapy | Male   | January  |
| Chemotherapy | Male   | January  |
| Chemotherapy | Female | January  |
| Chemotherapy | Female | January  |
| Chemotherapy | Male   | January  |
| Chemotherapy | Female | January  |
| Chemotherapy | Male   | January  |
| Chemotherapy | Male   | January  |
| Chemotherapy | Female | January  |
| Chemotherapy | Male   | January  |
| Chemotherapy | Female | January  |
| Chemotherapy | Female | January  |
| Chemotherapy | Female | July     |
| Chemotherapy | Male   | July     |
| Chemotherapy | Female | July     |
| Chemotherapy | Male   | July     |
| Chemotherapy | Female | July     |
| Chemotherapy | Female | July     |
| Chemotherapy | Male   | July     |
| Chemotherapy | Female | July     |
| Chemotherapy | Male   | July     |
| Chemotherapy | Female | July     |
| Chemotherapy | Female | July     |
| Chemotherapy | Male   | July     |
| Chemotherapy | Male   | June     |
| Chemotherapy | Female | June     |
| Chemotherapy | Male   | June     |
| Chemotherapy | Female | June     |
| Chemotherapy | Female | June     |
| Chemotherapy | Female | June     |
| Chemotherapy | Male   | June     |
| Chemotherapy | Female | June     |
| Chemotherapy | Male   | June     |
| Chemotherapy | Female | June     |

|              |        |          |
|--------------|--------|----------|
| Chemotherapy | Female | June     |
| Chemotherapy | Female | June     |
| Chemotherapy | Female | March    |
| Chemotherapy | Male   | March    |
| Chemotherapy | Female | March    |
| Chemotherapy | Male   | March    |
| Chemotherapy | Female | March    |
| Chemotherapy | Male   | March    |
| Chemotherapy | Male   | March    |
| Chemotherapy | Female | March    |
| Chemotherapy | Female | March    |
| Chemotherapy | Male   | March    |
| Chemotherapy | Female | March    |
| Chemotherapy | Male   | March    |
| Chemotherapy | Female | March    |
| Chemotherapy | Female | March    |
| Chemotherapy | Male   | March    |
| Chemotherapy | Male   | May      |
| Chemotherapy | Female | May      |
| Chemotherapy | Female | May      |
| Chemotherapy | Male   | May      |
| Chemotherapy | Female | May      |
| Chemotherapy | Female | May      |
| Chemotherapy | Female | May      |
| Chemotherapy | Male   | May      |
| Chemotherapy | Male   | May      |
| Chemotherapy | Female | May      |
| Chemotherapy | Male   | May      |
| Chemotherapy | Male   | May      |
| Chemotherapy | Female | May      |
| Chemotherapy | Female | May      |
| Chemotherapy | Female | November |
| Chemotherapy | Male   | November |
| Chemotherapy | Male   | November |
| Chemotherapy | Female | November |
| Chemotherapy | Male   | November |
| Chemotherapy | Male   | November |
| Chemotherapy | Female | November |
| Chemotherapy | Female | November |
| Chemotherapy | Male   | November |
| Chemotherapy | Female | November |
| Chemotherapy | Male   | November |
| Chemotherapy | Female | November |
| Chemotherapy | Male   | November |
| Chemotherapy | Female | November |
| Chemotherapy | Male   | November |
| Chemotherapy | Female | October  |

|              |        |           |
|--------------|--------|-----------|
| Chemotherapy | Male   | October   |
| Chemotherapy | Female | October   |
| Chemotherapy | Male   | October   |
| Chemotherapy | Female | October   |
| Chemotherapy | Female | October   |
| Chemotherapy | Male   | October   |
| Chemotherapy | Female | October   |
| Chemotherapy | Male   | October   |
| Chemotherapy | Male   | October   |
| Chemotherapy | Female | October   |
| Chemotherapy | Female | October   |
| Chemotherapy | Male   | October   |
| Chemotherapy | Male   | September |
| Chemotherapy | Female | September |
| Chemotherapy | Male   | September |
| Chemotherapy | Female | September |
| Chemotherapy | Male   | September |
| Chemotherapy | Female | September |
| Chemotherapy | Female | September |
| Chemotherapy | Male   | September |
| Chemotherapy | Female | September |
| Chemotherapy | Male   | September |
| Chemotherapy | Female | September |
| Chemotherapy | Female | September |
| Chemotherapy | Male   | September |
| Chemotherapy | Female | September |
| Chemotherapy | Male   | September |
| Chemotherapy | Female | September |
| Chemotherapy | Female | September |
| Chemotherapy | Male   | April     |
| Chemotherapy | Female | April     |
| Chemotherapy | Male   | April     |
| Chemotherapy | Male   | April     |
| Chemotherapy | Female | April     |
| Chemotherapy | Male   | April     |
| Chemotherapy | Female | April     |
| Chemotherapy | Male   | April     |
| Chemotherapy | Female | April     |
| Chemotherapy | Female | April     |
| Chemotherapy | Female | April     |
| Chemotherapy | Male   | August    |
| Chemotherapy | Female | August    |
| Chemotherapy | Male   | August    |
| Chemotherapy | Male   | August    |
| Chemotherapy | Male   | August    |

|              |        |          |
|--------------|--------|----------|
| Chemotherapy | Female | August   |
| Chemotherapy | Male   | August   |
| Chemotherapy | Female | August   |
| Chemotherapy | Female | December |
| Chemotherapy | Female | December |
| Chemotherapy | Male   | December |
| Chemotherapy | Male   | December |
| Chemotherapy | Male   | December |
| Chemotherapy | Female | December |
| Chemotherapy | Female | December |
| Chemotherapy | Male   | December |
| Chemotherapy | Female | December |
| Chemotherapy | Female | December |
| Chemotherapy | Male   | December |
| Chemotherapy | Female | December |
| Chemotherapy | Female | February |
| Chemotherapy | Male   | February |
| Chemotherapy | Female | February |
| Chemotherapy | Male   | February |
| Chemotherapy | Female | February |
| Chemotherapy | Male   | February |
| Chemotherapy | Female | February |
| Chemotherapy | Male   | February |
| Chemotherapy | Female | February |
| Chemotherapy | Male   | February |
| Chemotherapy | Female | February |
| Chemotherapy | Female | February |
| Chemotherapy | Male   | February |
| Chemotherapy | Male   | February |
| Chemotherapy | Female | January  |
| Chemotherapy | Female | January  |
| Chemotherapy | Male   | January  |
| Chemotherapy | Female | January  |
| Chemotherapy | Female | January  |
| Chemotherapy | Female | January  |
| Chemotherapy | Male   | January  |
| Chemotherapy | Male   | January  |
| Chemotherapy | Female | January  |
| Chemotherapy | Male   | January  |
| Chemotherapy | Female | January  |
| Chemotherapy | Male   | January  |
| Chemotherapy | Female | July     |
| Chemotherapy | Male   | July     |
| Chemotherapy | Male   | July     |
| Chemotherapy | Male   | July     |

|              |        |          |
|--------------|--------|----------|
| Chemotherapy | Female | July     |
| Chemotherapy | Female | July     |
| Chemotherapy | Male   | July     |
| Chemotherapy | Male   | July     |
| Chemotherapy | Female | June     |
| Chemotherapy | Male   | June     |
| Chemotherapy | Male   | June     |
| Chemotherapy | Male   | June     |
| Chemotherapy | Female | June     |
| Chemotherapy | Male   | June     |
| Chemotherapy | Female | June     |
| Chemotherapy | Female | June     |
| Chemotherapy | Female | March    |
| Chemotherapy | Male   | March    |
| Chemotherapy | Male   | March    |
| Chemotherapy | Female | March    |
| Chemotherapy | Male   | March    |
| Chemotherapy | Female | March    |
| Chemotherapy | Male   | March    |
| Chemotherapy | Male   | March    |
| Chemotherapy | Female | March    |
| Chemotherapy | Male   | May      |
| Chemotherapy | Male   | May      |
| Chemotherapy | Male   | May      |
| Chemotherapy | Female | May      |
| Chemotherapy | Female | May      |
| Chemotherapy | Male   | May      |
| Chemotherapy | Female | May      |
| Chemotherapy | Male   | May      |
| Chemotherapy | Female | May      |
| Chemotherapy | Female | May      |
| Chemotherapy | Female | November |
| Chemotherapy | Male   | November |
| Chemotherapy | Female | November |
| Chemotherapy | Male   | November |
| Chemotherapy | Female | November |
| Chemotherapy | Male   | November |
| Chemotherapy | Male   | November |
| Chemotherapy | Male   | November |
| Chemotherapy | Female | November |
| Chemotherapy | Female | November |
| Chemotherapy | Male   | November |
| Chemotherapy | Female | November |
| Chemotherapy | Female | November |
| Chemotherapy | Female | November |

|              |        |           |
|--------------|--------|-----------|
| Chemotherapy | Female | October   |
| Chemotherapy | Female | October   |
| Chemotherapy | Male   | October   |
| Chemotherapy | Male   | October   |
| Chemotherapy | Female | October   |
| Chemotherapy | Male   | October   |
| Chemotherapy | Female | October   |
| Chemotherapy | Male   | October   |
| Chemotherapy | Male   | October   |
| Chemotherapy | Female | October   |
| Chemotherapy | Male   | October   |
| Chemotherapy | Female | September |
| Chemotherapy | Female | September |
| Chemotherapy | Male   | September |
| Chemotherapy | Female | September |
| Chemotherapy | Female | September |
| Chemotherapy | Female | September |
| Chemotherapy | Male   | September |
| Chemotherapy | Female | September |
| Chemotherapy | Male   | September |
| Chemotherapy | Male   | September |
| Chemotherapy | Male   | April     |
| Chemotherapy | Female | April     |
| Chemotherapy | Male   | April     |
| Chemotherapy | Male   | April     |
| Chemotherapy | Female | April     |
| Chemotherapy | Female | April     |
| Chemotherapy | Female | April     |
| Chemotherapy | Male   | April     |
| Chemotherapy | Male   | April     |
| Chemotherapy | Female | April     |
| Chemotherapy | Male   | April     |
| Chemotherapy | Male   | April     |
| Chemotherapy | Female | April     |
| Chemotherapy | Male   | April     |
| Chemotherapy | Female | April     |
| Chemotherapy | Female | April     |
| Chemotherapy | Male   | April     |
| Chemotherapy | Male   | April     |
| Chemotherapy | Female | April     |
| Chemotherapy | Male   | April     |
| Chemotherapy | Male   | August    |
| Chemotherapy | Female | August    |
| Chemotherapy | Female | August    |
| Chemotherapy | Male   | August    |
| Chemotherapy | Male   | August    |
| Chemotherapy | Female | August    |
| Chemotherapy | Male   | August    |
| Chemotherapy | Female | August    |
| Chemotherapy | Female | August    |

|              |        |          |
|--------------|--------|----------|
| Chemotherapy | Female | August   |
| Chemotherapy | Male   | August   |
| Chemotherapy | Male   | August   |
| Chemotherapy | Female | August   |
| Chemotherapy | Male   | August   |
| Chemotherapy | Female | December |
| Chemotherapy | Male   | December |
| Chemotherapy | Female | December |
| Chemotherapy | Female | December |
| Chemotherapy | Male   | December |
| Chemotherapy | Male   | December |
| Chemotherapy | Female | December |
| Chemotherapy | Male   | December |
| Chemotherapy | Male   | December |
| Chemotherapy | Female | December |
| Chemotherapy | Female | December |
| Chemotherapy | Male   | December |
| Chemotherapy | Female | December |
| Chemotherapy | Male   | December |
| Chemotherapy | Female | December |
| Chemotherapy | Female | December |
| Chemotherapy | Female | December |
| Chemotherapy | Male   | December |
| Chemotherapy | Male   | December |
| Chemotherapy | Female | December |
| Chemotherapy | Female | December |
| Chemotherapy | Female | February |
| Chemotherapy | Female | February |
| Chemotherapy | Female | February |
| Chemotherapy | Male   | February |
| Chemotherapy | Female | February |
| Chemotherapy | Female | February |
| Chemotherapy | Male   | February |
| Chemotherapy | Female | February |
| Chemotherapy | Female | February |
| Chemotherapy | Female | February |
| Chemotherapy | Male   | February |

|              |        |          |
|--------------|--------|----------|
| Chemotherapy | Female | February |
| Chemotherapy | Male   | February |
| Chemotherapy | Male   | February |
| Chemotherapy | Female | February |
| Chemotherapy | Male   | January  |
| Chemotherapy | Female | January  |
| Chemotherapy | Male   | January  |
| Chemotherapy | Male   | January  |
| Chemotherapy | Female | January  |
| Chemotherapy | Male   | January  |
| Chemotherapy | Male   | January  |
| Chemotherapy | Female | January  |
| Chemotherapy | Female | January  |
| Chemotherapy | Male   | January  |
| Chemotherapy | Male   | July     |
| Chemotherapy | Female | July     |
| Chemotherapy | Male   | July     |
| Chemotherapy | Male   | July     |
| Chemotherapy | Female | July     |
| Chemotherapy | Female | July     |
| Chemotherapy | Male   | July     |
| Chemotherapy | Male   | July     |
| Chemotherapy | Female | July     |
| Chemotherapy | Male   | July     |
| Chemotherapy | Male   | July     |
| Chemotherapy | Female | July     |
| Chemotherapy | Female | July     |
| Chemotherapy | Female | July     |
| Chemotherapy | Male   | July     |
| Chemotherapy | Male   | July     |
| Chemotherapy | Female | July     |
| Chemotherapy | Female | July     |
| Chemotherapy | Female | June     |
| Chemotherapy | Male   | June     |
| Chemotherapy | Male   | June     |
| Chemotherapy | Female | June     |
| Chemotherapy | Female | June     |
| Chemotherapy | Female | June     |
| Chemotherapy | Male   | June     |
| Chemotherapy | Female | June     |
| Chemotherapy | Female | June     |
| Chemotherapy | Female | June     |

|              |        |          |
|--------------|--------|----------|
| Chemotherapy | Female | June     |
| Chemotherapy | Male   | June     |
| Chemotherapy | Male   | March    |
| Chemotherapy | Female | March    |
| Chemotherapy | Female | March    |
| Chemotherapy | Female | March    |
| Chemotherapy | Male   | March    |
| Chemotherapy | Male   | March    |
| Chemotherapy | Male   | March    |
| Chemotherapy | Female | March    |
| Chemotherapy | Female | March    |
| Chemotherapy | Male   | March    |
| Chemotherapy | Female | March    |
| Chemotherapy | Female | March    |
| Chemotherapy | Female | March    |
| Chemotherapy | Male   | March    |
| Chemotherapy | Female | March    |
| Chemotherapy | Male   | March    |
| Chemotherapy | Male   | March    |
| Chemotherapy | Female | March    |
| Chemotherapy | Female | May      |
| Chemotherapy | Female | May      |
| Chemotherapy | Female | May      |
| Chemotherapy | Male   | May      |
| Chemotherapy | Female | May      |
| Chemotherapy | Female | May      |
| Chemotherapy | Female | May      |
| Chemotherapy | Male   | May      |
| Chemotherapy | Male   | May      |
| Chemotherapy | Female | May      |
| Chemotherapy | Female | May      |
| Chemotherapy | Male   | May      |
| Chemotherapy | Female | May      |
| Chemotherapy | Male   | May      |
| Chemotherapy | Male   | May      |
| Chemotherapy | Male   | May      |
| Chemotherapy | Female | May      |
| Chemotherapy | Male   | May      |
| Chemotherapy | Male   | May      |
| Chemotherapy | Male   | May      |
| Chemotherapy | Female | November |
| Chemotherapy | Male   | November |
| Chemotherapy | Female | November |
| Chemotherapy | Male   | November |
| Chemotherapy | Male   | November |
| Chemotherapy | Female | November |

|              |        |           |
|--------------|--------|-----------|
| Chemotherapy | Male   | November  |
| Chemotherapy | Male   | November  |
| Chemotherapy | Male   | November  |
| Chemotherapy | Female | November  |
| Chemotherapy | Female | November  |
| Chemotherapy | Female | November  |
| Chemotherapy | Male   | October   |
| Chemotherapy | Female | October   |
| Chemotherapy | Male   | October   |
| Chemotherapy | Female | October   |
| Chemotherapy | Female | October   |
| Chemotherapy | Female | October   |
| Chemotherapy | Male   | October   |
| Chemotherapy | Female | October   |
| Chemotherapy | Female | October   |
| Chemotherapy | Male   | October   |
| Chemotherapy | Male   | October   |
| Chemotherapy | Female | October   |
| Chemotherapy | Male   | October   |
| Chemotherapy | Male   | September |
| Chemotherapy | Female | September |
| Chemotherapy | Male   | September |
| Chemotherapy | Female | September |
| Chemotherapy | Male   | September |
| Chemotherapy | Female | September |
| Chemotherapy | Female | September |
| Chemotherapy | Female | September |
| Chemotherapy | Male   | September |
| Chemotherapy | Female | September |
| Chemotherapy | Female | September |
| Chemotherapy | Male   | September |
| Chemotherapy | Male   | September |
| Chemotherapy | Female | September |
| Chemotherapy | Female | September |
| Chemotherapy | Male   | September |
| Chemotherapy | Female | April     |
| Chemotherapy | Female | April     |
| Chemotherapy | Male   | April     |
| Chemotherapy | Female | April     |

|              |        |          |
|--------------|--------|----------|
| Chemotherapy | Female | April    |
| Chemotherapy | Female | April    |
| Chemotherapy | Male   | April    |
| Chemotherapy | Female | April    |
| Chemotherapy | Female | April    |
| Chemotherapy | Male   | April    |
| Chemotherapy | Male   | April    |
| Chemotherapy | Female | April    |
| Chemotherapy | Male   | April    |
| Chemotherapy | Female | April    |
| Chemotherapy | Male   | April    |
| Chemotherapy | Female | April    |
| Chemotherapy | Female | April    |
| Chemotherapy | Female | April    |
| Chemotherapy | Male   | April    |
| Chemotherapy | Female | April    |
| Chemotherapy | Male   | April    |
| Chemotherapy | Female | August   |
| Chemotherapy | Male   | August   |
| Chemotherapy | Female | August   |
| Chemotherapy | Male   | August   |
| Chemotherapy | Male   | August   |
| Chemotherapy | Female | August   |
| Chemotherapy | Female | August   |
| Chemotherapy | Male   | August   |
| Chemotherapy | Female | August   |
| Chemotherapy | Male   | August   |
| Chemotherapy | Male   | August   |
| Chemotherapy | Male   | August   |
| Chemotherapy | Female | August   |
| Chemotherapy | Male   | August   |
| Chemotherapy | Female | August   |
| Chemotherapy | Male   | August   |
| Chemotherapy | Female | August   |
| Chemotherapy | Male   | August   |
| Chemotherapy | Female | August   |
| Chemotherapy | Male   | December |
| Chemotherapy | Female | December |
| Chemotherapy | Female | December |
| Chemotherapy | Male   | December |
| Chemotherapy | Female | December |
| Chemotherapy | Female | December |
| Chemotherapy | Male   | December |
| Chemotherapy | Male   | December |
| Chemotherapy | Male   | December |
| Chemotherapy | Female | December |
| Chemotherapy | Female | December |

|              |        |          |
|--------------|--------|----------|
| Chemotherapy | Male   | December |
| Chemotherapy | Male   | December |
| Chemotherapy | Female | December |
| Chemotherapy | Male   | February |
| Chemotherapy | Male   | February |
| Chemotherapy | Male   | February |
| Chemotherapy | Female | February |
| Chemotherapy | Male   | February |
| Chemotherapy | Male   | February |
| Chemotherapy | Female | February |
| Chemotherapy | Male   | February |
| Chemotherapy | Female | February |
| Chemotherapy | Male   | February |
| Chemotherapy | Female | February |
| Chemotherapy | Male   | February |
| Chemotherapy | Female | February |
| Chemotherapy | Female | February |
| Chemotherapy | Male   | February |
| Chemotherapy | Female | February |
| Chemotherapy | Male   | February |
| Chemotherapy | Male   | February |
| Chemotherapy | Female | February |
| Chemotherapy | Female | February |
| Chemotherapy | Male   | February |
| Chemotherapy | Male   | February |
| Chemotherapy | Male   | February |
| Chemotherapy | Female | February |
| Chemotherapy | Male   | February |
| Chemotherapy | Male   | February |
| Chemotherapy | Female | February |
| Chemotherapy | Male   | February |
| Chemotherapy | Male   | February |
| Chemotherapy | Female | February |
| Chemotherapy | Female | January  |
| Chemotherapy | Male   | January  |
| Chemotherapy | Female | January  |
| Chemotherapy | Male   | January  |
| Chemotherapy | Male   | January  |
| Chemotherapy | Female | January  |
| Chemotherapy | Female | January  |
| Chemotherapy | Male   | January  |
| Chemotherapy | Male   | January  |
| Chemotherapy | Female | January  |
| Chemotherapy | Male   | January  |
| Chemotherapy | Male   | January  |

|              |        |       |
|--------------|--------|-------|
| Chemotherapy | Male   | July  |
| Chemotherapy | Female | July  |
| Chemotherapy | Female | July  |
| Chemotherapy | Female | July  |
| Chemotherapy | Male   | July  |
| Chemotherapy | Male   | July  |
| Chemotherapy | Male   | July  |
| Chemotherapy | Female | July  |
| Chemotherapy | Male   | July  |
| Chemotherapy | Male   | July  |
| Chemotherapy | Male   | July  |
| Chemotherapy | Female | July  |
| Chemotherapy | Male   | July  |
| Chemotherapy | Female | July  |
| Chemotherapy | Male   | June  |
| Chemotherapy | Male   | June  |
| Chemotherapy | Female | June  |
| Chemotherapy | Female | June  |
| Chemotherapy | Male   | June  |
| Chemotherapy | Female | June  |
| Chemotherapy | Male   | June  |
| Chemotherapy | Male   | June  |
| Chemotherapy | Female | June  |
| Chemotherapy | Male   | June  |
| Chemotherapy | Male   | June  |
| Chemotherapy | Male   | June  |
| Chemotherapy | Female | June  |
| Chemotherapy | Female | June  |
| Chemotherapy | Female | June  |
| Chemotherapy | Male   | June  |
| Chemotherapy | Female | June  |
| Chemotherapy | Male   | June  |
| Chemotherapy | Male   | June  |
| Chemotherapy | Male   | June  |
| Chemotherapy | Female | June  |
| Chemotherapy | Female | June  |
| Chemotherapy | Female | June  |
| Chemotherapy | Male   | June  |
| Chemotherapy | Female | June  |
| Chemotherapy | Male   | June  |
| Chemotherapy | Female | June  |
| Chemotherapy | Male   | June  |
| Chemotherapy | Female | June  |
| Chemotherapy | Male   | June  |
| Chemotherapy | Female | March |
| Chemotherapy | Male   | March |
| Chemotherapy | Female | March |

|              |        |          |
|--------------|--------|----------|
| Chemotherapy | Female | March    |
| Chemotherapy | Male   | March    |
| Chemotherapy | Male   | March    |
| Chemotherapy | Female | March    |
| Chemotherapy | Male   | March    |
| Chemotherapy | Male   | March    |
| Chemotherapy | Female | March    |
| Chemotherapy | Male   | March    |
| Chemotherapy | Male   | March    |
| Chemotherapy | Female | March    |
| Chemotherapy | Female | March    |
| Chemotherapy | Male   | May      |
| Chemotherapy | Female | May      |
| Chemotherapy | Male   | May      |
| Chemotherapy | Male   | May      |
| Chemotherapy | Female | May      |
| Chemotherapy | Female | May      |
| Chemotherapy | Male   | May      |
| Chemotherapy | Male   | May      |
| Chemotherapy | Female | May      |
| Chemotherapy | Male   | May      |
| Chemotherapy | Female | May      |
| Chemotherapy | Male   | May      |
| Chemotherapy | Male   | May      |
| Chemotherapy | Female | May      |
| Chemotherapy | Male   | May      |
| Chemotherapy | Female | May      |
| Chemotherapy | Male   | May      |
| Chemotherapy | Male   | May      |
| Chemotherapy | Female | May      |
| Chemotherapy | Female | November |
| Chemotherapy | Female | November |
| Chemotherapy | Male   | November |
| Chemotherapy | Male   | November |
| Chemotherapy | Male   | November |

|              |        |           |
|--------------|--------|-----------|
| Chemotherapy | Male   | November  |
| Chemotherapy | Male   | November  |
| Chemotherapy | Female | November  |
| Chemotherapy | Male   | November  |
| Chemotherapy | Male   | November  |
| Chemotherapy | Male   | November  |
| Chemotherapy | Female | November  |
| Chemotherapy | Male   | November  |
| Chemotherapy | Female | November  |
| Chemotherapy | Male   | November  |
| Chemotherapy | Female | November  |
| Chemotherapy | Male   | November  |
| Chemotherapy | Female | November  |
| Chemotherapy | Female | November  |
| Chemotherapy | Female | November  |
| Chemotherapy | Male   | November  |
| Chemotherapy | Female | November  |
| Chemotherapy | Male   | November  |
| Chemotherapy | Male   | November  |
| Chemotherapy | Female | November  |
| Chemotherapy | Female | October   |
| Chemotherapy | Male   | October   |
| Chemotherapy | Female | October   |
| Chemotherapy | Female | October   |
| Chemotherapy | Male   | October   |
| Chemotherapy | Female | October   |
| Chemotherapy | Female | October   |
| Chemotherapy | Female | October   |
| Chemotherapy | Male   | October   |
| Chemotherapy | Male   | October   |
| Chemotherapy | Female | October   |
| Chemotherapy | Male   | October   |
| Chemotherapy | Female | October   |
| Chemotherapy | Male   | October   |
| Chemotherapy | Male   | October   |
| Chemotherapy | Female | October   |
| Chemotherapy | Female | October   |
| Chemotherapy | Male   | October   |
| Chemotherapy | Female | September |
| Chemotherapy | Male   | September |
| Chemotherapy | Male   | September |

Chemotherapy  
Chemotherapy

|        |           |
|--------|-----------|
| Female | September |
| Male   | September |
| Female | September |
| Male   | September |
| Male   | September |
| Female | September |
| Female | September |
| Male   | September |
| Male   | September |
| Female | September |
| Male   | September |
| Male   | September |
| Female | September |
| Male   | September |
| Female | September |
| Male   | September |
| Female | September |
| Male   | September |
| Female | September |



[illegible]

[illegible]



[illegible]

[illegible]

[illegible]

[illegible]

[illegible]

[illegible]



[illegible]

[illegible]

[illegible]

[illegible]







[illegible]

[illegible]

[illegible]

[illegible]

[illegible]

[illegible]

[illegible]

[illegible]

[illegible]

[illegible]

0 40- 49 Yrs  
0 30- 39 Yrs  
0 40- 49 Yrs  
0 30- 39 Yrs  
0 10- 19 Yrs  
0 20- 29 Yrs  
0 10- 19 Yrs  
0 20- 29 Yrs  
0 40- 49 Yrs  
0 60- 69 Yrs  
0 70+ Yrs  
0 70+ Yrs  
0 < 10 Yrs  
0 50- 59 Yrs  
0 50- 59 Yrs  
0 60- 69 Yrs  
0 < 10 Yrs  
0 50- 59 Yrs  
0 60- 69 Yrs  
0 70+ Yrs  
0 50- 59 Yrs  
0 70+ Yrs  
0 60- 69 Yrs  
0 40- 49 Yrs  
0 70+ Yrs  
0 60- 69 Yrs  
0 50- 59 Yrs  
0 70+ Yrs  
0 40- 49 Yrs  
0 40- 49 Yrs  
0 70+ Yrs

0 60- 69 Yrs  
0 50- 59 Yrs  
0 < 10 Yrs  
0 60- 69 Yrs  
0 50- 59 Yrs  
0 60- 69 Yrs  
0 < 10 Yrs  
0 70+ Yrs  
0 70+ Yrs  
0 30- 39 Yrs  
0 40- 49 Yrs  
0 20- 29 Yrs  
0 40- 49 Yrs  
0 30- 39 Yrs  
0 10- 19 Yrs  
0 20- 29 Yrs  
0 10- 19 Yrs  
0 50- 59 Yrs  
0 50- 59 Yrs  
0 70+ Yrs  
0 60- 69 Yrs  
0 < 10 Yrs  
0 70+ Yrs  
0 < 10 Yrs  
0 30- 39 Yrs  
0 10- 19 Yrs  
0 50- 59 Yrs  
0 10- 19 Yrs  
0 50- 59 Yrs  
0 30- 39 Yrs  
0 20- 29 Yrs  
0 40- 49 Yrs  
0 40- 49 Yrs  
0 40- 49 Yrs  
0 20- 29 Yrs  
0 60- 69 Yrs  
0 70+ Yrs  
0 60- 69 Yrs  
0 < 10 Yrs  
0 40- 49 Yrs  
0 70+ Yrs  
0 50- 59 Yrs  
0 60- 69 Yrs  
0 50- 59 Yrs  
0 60- 69 Yrs  
0 70+ Yrs  
0 40- 49 Yrs  
0 70+ Yrs  
0 70+ Yrs  
0 40- 49 Yrs

0 10- 19 Yrs  
0 70+ Yrs  
0 50- 59 Yrs  
0 60- 69 Yrs  
0 40- 49 Yrs  
0 50- 59 Yrs  
0 70+ Yrs  
0 60- 69 Yrs  
0 60- 69 Yrs  
0 50- 59 Yrs  
0 70+ Yrs  
0 70+ Yrs  
0 60- 69 Yrs  
0 < 10 Yrs  
0 < 10 Yrs  
0 40- 49 Yrs  
0 40- 49 Yrs  
0 50- 59 Yrs  
0 60- 69 Yrs  
0 70+ Yrs  
0 40- 49 Yrs  
0 60- 69 Yrs  
0 40- 49 Yrs  
0 30- 39 Yrs  
0 50- 59 Yrs  
0 50- 59 Yrs  
0 40- 49 Yrs  
0 40- 49 Yrs  
0 30- 39 Yrs  
0 50- 59 Yrs  
0 60- 69 Yrs  
0 40- 49 Yrs  
0 50- 59 Yrs  
0 30- 39 Yrs  
0 40- 49 Yrs  
0 40- 49 Yrs  
0 50- 59 Yrs  
0 60- 69 Yrs  
0 50- 59 Yrs  
0 50- 59 Yrs  
0 50- 59 Yrs  
0 40- 49 Yrs  
0 60- 69 Yrs  
0 30- 39 Yrs  
0 40- 49 Yrs  
0 60- 69 Yrs  
0 50- 59 Yrs  
0 40- 49 Yrs  
0 40- 49 Yrs  
0 30- 39 Yrs

0 50- 59 Yrs  
0 30- 39 Yrs  
0 50- 59 Yrs  
0 60- 69 Yrs  
0 40- 49 Yrs  
0 40- 49 Yrs  
0 40- 49 Yrs  
0 30- 39 Yrs  
0 40- 49 Yrs  
0 60- 69 Yrs  
0 50- 59 Yrs  
0 50- 59 Yrs  
0 50- 59 Yrs  
0 40- 49 Yrs  
0 50- 59 Yrs  
0 40- 49 Yrs  
0 50- 59 Yrs  
0 60- 69 Yrs  
0 30- 39 Yrs  
0 40- 49 Yrs  
0 30- 39 Yrs  
0 50- 59 Yrs  
0 40- 49 Yrs  
0 50- 59 Yrs  
0 60- 69 Yrs  
0 60- 69 Yrs  
0 50- 59 Yrs  
0 50- 59 Yrs  
0 40- 49 Yrs  
0 40- 49 Yrs  
0 30- 39 Yrs  
0 40- 49 Yrs  
0 30- 39 Yrs  
0 60- 69 Yrs  
0 50- 59 Yrs  
0 40- 49 Yrs  
0 50- 59 Yrs  
0 60- 69 Yrs  
0 50- 59 Yrs  
0 50- 59 Yrs  
0 40- 49 Yrs  
0 30- 39 Yrs  
0 30- 39 Yrs  
0 20- 29 Yrs  
0 10- 19 Yrs  
0 30- 39 Yrs  
0 20- 29 Yrs  
0 10- 19 Yrs  
0 30- 39 Yrs  
0 70+ Yrs

0 60- 69 Yrs  
0 70+ Yrs  
0 70+ Yrs  
0 60- 69 Yrs  
0 50- 59 Yrs  
0 50- 59 Yrs  
0 30- 39 Yrs  
0 30- 39 Yrs  
0 40- 49 Yrs  
0 70+ Yrs  
0 50- 59 Yrs  
0 30- 39 Yrs  
0 20- 29 Yrs  
0 10- 19 Yrs  
0 30- 39 Yrs  
0 40- 49 Yrs  
0 50- 59 Yrs  
0 30- 39 Yrs  
0 20- 29 Yrs  
0 10- 19 Yrs  
0 60- 69 Yrs  
0 60- 69 Yrs  
0 70+ Yrs  
0 30- 39 Yrs  
0 20- 29 Yrs  
0 30- 39 Yrs  
0 30- 39 Yrs  
0 60- 69 Yrs  
0 10- 19 Yrs  
0 50- 59 Yrs  
0 30- 39 Yrs  
0 40- 49 Yrs  
0 50- 59 Yrs  
0 60- 69 Yrs  
0 30- 39 Yrs  
0 10- 19 Yrs  
0 20- 29 Yrs  
0 20- 29 Yrs  
0 10- 19 Yrs  
0 30- 39 Yrs  
0 50- 59 Yrs  
0 40- 49 Yrs  
0 30- 39 Yrs  
0 60- 69 Yrs  
0 20- 29 Yrs  
0 30- 39 Yrs  
0 30- 39 Yrs  
0 60- 69 Yrs  
0 70+ Yrs  
0 50- 59 Yrs

0 50- 59 Yrs  
0 10- 19 Yrs  
0 20- 29 Yrs  
0 60- 69 Yrs  
0 10- 19 Yrs  
0 50- 59 Yrs  
0 60- 69 Yrs  
0 30- 39 Yrs  
0 70+ Yrs  
0 50- 59 Yrs  
0 50- 59 Yrs  
0 40- 49 Yrs  
0 70+ Yrs  
0 30- 39 Yrs  
0 60- 69 Yrs  
0 30- 39 Yrs  
0 20- 29 Yrs  
0 10- 19 Yrs  
0 10- 19 Yrs  
0 60- 69 Yrs  
0 60- 69 Yrs  
0 20- 29 Yrs  
0 50- 59 Yrs  
0 40- 49 Yrs  
0 20- 29 Yrs  
0 20- 29 Yrs  
0 30- 39 Yrs  
0 10- 19 Yrs  
0 40- 49 Yrs  
0 < 10 Yrs  
0 40- 49 Yrs  
0 < 10 Yrs  
0 30- 39 Yrs  
0 30- 39 Yrs  
0 40- 49 Yrs  
0 60- 69 Yrs  
0 70+ Yrs  
0 60- 69 Yrs  
0 50- 59 Yrs  
0 50- 59 Yrs  
0 70+ Yrs  
0 10- 19 Yrs  
0 10- 19 Yrs  
0 20- 29 Yrs  
0 20- 29 Yrs  
0 40- 49 Yrs  
0 50- 59 Yrs  
0 50- 59 Yrs  
0 40- 49 Yrs  
0 60- 69 Yrs

0 60- 69 Yrs  
0 70+ Yrs  
0 70+ Yrs  
0 < 10 Yrs  
0 30- 39 Yrs  
0 10- 19 Yrs  
0 10- 19 Yrs  
0 20- 29 Yrs  
0 20- 29 Yrs  
0 30- 39 Yrs  
0 < 10 Yrs  
0 20- 29 Yrs  
0 10- 19 Yrs  
0 10- 19 Yrs  
0 20- 29 Yrs  
0 40- 49 Yrs  
0 30- 39 Yrs  
0 60- 69 Yrs  
0 50- 59 Yrs  
0 50- 59 Yrs  
0 40- 49 Yrs  
0 10- 19 Yrs  
0 10- 19 Yrs  
0 30- 39 Yrs  
0 20- 29 Yrs  
0 20- 29 Yrs  
0 60- 69 Yrs  
0 < 10 Yrs  
0 70+ Yrs  
0 < 10 Yrs  
0 70+ Yrs  
0 20- 29 Yrs  
0 10- 19 Yrs  
0 10- 19 Yrs  
0 70+ Yrs  
0 < 10 Yrs  
0 30- 39 Yrs  
0 40- 49 Yrs  
0 40- 49 Yrs  
0 < 10 Yrs  
0 50- 59 Yrs  
0 60- 69 Yrs  
0 60- 69 Yrs  
0 20- 29 Yrs  
0 20- 29 Yrs  
0 50- 59 Yrs  
0 30- 39 Yrs  
0 70+ Yrs  
0 40- 49 Yrs  
0 40- 49 Yrs

0 60- 69 Yrs  
0 60- 69 Yrs  
0 < 10 Yrs  
0 < 10 Yrs  
0 70+ Yrs  
0 70+ Yrs  
0 10- 19 Yrs  
0 30- 39 Yrs  
0 20- 29 Yrs  
0 30- 39 Yrs  
0 20- 29 Yrs  
0 50- 59 Yrs  
0 50- 59 Yrs  
0 40- 49 Yrs  
0 10- 19 Yrs  
0 40- 49 Yrs  
0 70+ Yrs  
0 70+ Yrs  
0 10- 19 Yrs  
0 70+ Yrs  
0 70+ Yrs  
0 70+ Yrs  
0 20- 29 Yrs  
0 10- 19 Yrs  
0 70+ Yrs  
0 60- 69 Yrs  
0 60- 69 Yrs  
0 50- 59 Yrs  
0 70+ Yrs  
0 50- 59 Yrs  
0 30- 39 Yrs  
0 20- 29 Yrs  
0 10- 19 Yrs  
0 20- 29 Yrs  
0 40- 49 Yrs  
0 40- 49 Yrs  
0 30- 39 Yrs  
0 60- 69 Yrs  
0 70+ Yrs  
0 70+ Yrs  
0 50- 59 Yrs  
0 60- 69 Yrs  
0 50- 59 Yrs  
0 40- 49 Yrs  
0 30- 39 Yrs  
0 30- 39 Yrs  
0 40- 49 Yrs  
0 10- 19 Yrs  
0 20- 29 Yrs  
0 20- 29 Yrs

0 60- 69 Yrs  
0 40- 49 Yrs  
0 50- 59 Yrs  
0 70+ Yrs  
0 50- 59 Yrs  
0 70+ Yrs  
0 60- 69 Yrs  
0 10- 19 Yrs  
0 30- 39 Yrs  
0 40- 49 Yrs  
0 30- 39 Yrs  
0 20- 29 Yrs  
0 20- 29 Yrs  
0 70+ Yrs  
0 10- 19 Yrs  
0 50- 59 Yrs  
0 40- 49 Yrs  
0 40- 49 Yrs  
0 60- 69 Yrs  
0 50- 59 Yrs  
0 60- 69 Yrs  
0 10- 19 Yrs  
0 20- 29 Yrs  
0 30- 39 Yrs  
0 30- 39 Yrs  
0 20- 29 Yrs  
0 70+ Yrs  
0 70+ Yrs  
0 70+ Yrs  
0 70+ Yrs  
0 10- 19 Yrs  
0 20- 29 Yrs  
0 60- 69 Yrs  
0 60- 69 Yrs  
0 40- 49 Yrs  
0 40- 49 Yrs  
0 20- 29 Yrs  
0 50- 59 Yrs  
0 30- 39 Yrs  
0 70+ Yrs  
0 70+ Yrs  
0 50- 59 Yrs  
0 10- 19 Yrs  
0 30- 39 Yrs  
0 70+ Yrs  
0 70+ Yrs  
0 30- 39 Yrs  
0 40- 49 Yrs  
0 30- 39 Yrs  
0 10- 19 Yrs

0 20- 29 Yrs  
0 20- 29 Yrs  
0 70+ Yrs  
0 70+ Yrs  
0 50- 59 Yrs  
0 50- 59 Yrs  
0 40- 49 Yrs  
0 60- 69 Yrs  
0 60- 69 Yrs  
0 70+ Yrs  
0 70+ Yrs  
0 60- 69 Yrs  
0 60- 69 Yrs  
0 50- 59 Yrs  
0 50- 59 Yrs  
0 40- 49 Yrs  
0 30- 39 Yrs  
0 10- 19 Yrs  
0 50- 59 Yrs  
0 40- 49 Yrs  
0 60- 69 Yrs  
0 60- 69 Yrs  
0 70+ Yrs  
0 50- 59 Yrs  
0 70+ Yrs  
0 10- 19 Yrs  
0 30- 39 Yrs  
0 70+ Yrs  
0 70+ Yrs  
0 60- 69 Yrs  
0 60- 69 Yrs  
0 50- 59 Yrs  
0 50- 59 Yrs  
0 40- 49 Yrs  
0 30- 39 Yrs  
0 10- 19 Yrs  
0 60- 69 Yrs  
0 60- 69 Yrs  
0 70+ Yrs  
0 70+ Yrs  
0 50- 59 Yrs  
0 10- 19 Yrs  
0 30- 39 Yrs  
0 40- 49 Yrs  
0 50- 59 Yrs  
0 50- 59 Yrs  
0 50- 59 Yrs  
0 30- 39 Yrs  
0 60- 69 Yrs  
0 40- 49 Yrs

0 60- 69 Yrs  
0 70+ Yrs  
0 70+ Yrs  
0 10- 19 Yrs  
0 70+ Yrs  
0 70+ Yrs  
0 50- 59 Yrs  
0 50- 59 Yrs  
0 30- 39 Yrs  
0 10- 19 Yrs  
0 70+ Yrs  
0 60- 69 Yrs  
0 60- 69 Yrs  
0 50- 59 Yrs  
0 40- 49 Yrs  
0 30- 39 Yrs  
0 10- 19 Yrs  
0 50- 59 Yrs  
0 70+ Yrs  
0 70+ Yrs  
0 70+ Yrs  
0 10- 19 Yrs  
0 30- 39 Yrs  
0 40- 49 Yrs  
0 50- 59 Yrs  
0 50- 59 Yrs  
0 60- 69 Yrs  
0 60- 69 Yrs  
0 10- 19 Yrs  
0 50- 59 Yrs  
0 60- 69 Yrs  
0 50- 59 Yrs  
0 30- 39 Yrs  
0 40- 49 Yrs  
0 60- 69 Yrs  
0 70+ Yrs  
0 70+ Yrs  
0 70+ Yrs  
0 40- 49 Yrs  
0 10- 19 Yrs  
0 60- 69 Yrs  
0 70+ Yrs  
0 60- 69 Yrs  
0 50- 59 Yrs  
0 60- 69 Yrs  
0 60- 69 Yrs  
0 70+ Yrs  
0 10- 19 Yrs  
0 40- 49 Yrs  
0 50- 59 Yrs

0 40- 49 Yrs  
0 30- 39 Yrs  
0 50- 59 Yrs  
0 60- 69 Yrs  
0 50- 59 Yrs  
0 70+ Yrs  
0 70+ Yrs  
0 60- 69 Yrs  
0 60- 69 Yrs  
0 30- 39 Yrs  
0 10- 19 Yrs  
0 30- 39 Yrs  
0 10- 19 Yrs  
0 20- 29 Yrs  
0 20- 29 Yrs  
0 40- 49 Yrs  
0 50- 59 Yrs  
0 50- 59 Yrs  
0 40- 49 Yrs  
0 20- 29 Yrs  
0 10- 19 Yrs  
0 10- 19 Yrs  
0 20- 29 Yrs  
0 70+ Yrs  
0 70+ Yrs  
0 40- 49 Yrs  
0 40- 49 Yrs  
0 30- 39 Yrs  
0 30- 39 Yrs  
0 60- 69 Yrs  
0 50- 59 Yrs  
0 50- 59 Yrs  
0 60- 69 Yrs  
0 10- 19 Yrs  
0 10- 19 Yrs  
0 30- 39 Yrs  
0 40- 49 Yrs  
0 40- 49 Yrs  
0 20- 29 Yrs  
0 30- 39 Yrs  
0 20- 29 Yrs  
0 60- 69 Yrs  
0 70+ Yrs  
0 70+ Yrs  
0 50- 59 Yrs  
0 50- 59 Yrs  
0 60- 69 Yrs  
0 20- 29 Yrs  
0 30- 39 Yrs  
0 20- 29 Yrs

0 10- 19 Yrs  
0 10- 19 Yrs  
0 70+ Yrs  
0 60- 69 Yrs  
0 70+ Yrs  
0 30- 39 Yrs  
0 40- 49 Yrs  
0 50- 59 Yrs  
0 50- 59 Yrs  
0 40- 49 Yrs  
0 60- 69 Yrs  
0 40- 49 Yrs  
0 50- 59 Yrs  
0 40- 49 Yrs  
0 30- 39 Yrs  
0 20- 29 Yrs  
0 10- 19 Yrs  
0 10- 19 Yrs  
0 30- 39 Yrs  
0 20- 29 Yrs  
0 60- 69 Yrs  
0 60- 69 Yrs  
0 70+ Yrs  
0 50- 59 Yrs  
0 70+ Yrs  
0 10- 19 Yrs  
0 50- 59 Yrs  
0 60- 69 Yrs  
0 50- 59 Yrs  
0 70+ Yrs  
0 70+ Yrs  
0 60- 69 Yrs  
0 40- 49 Yrs  
0 20- 29 Yrs  
0 10- 19 Yrs  
0 20- 29 Yrs  
0 40- 49 Yrs  
0 30- 39 Yrs  
0 30- 39 Yrs  
0 10- 19 Yrs  
0 50- 59 Yrs  
0 50- 59 Yrs  
0 10- 19 Yrs  
0 30- 39 Yrs  
0 20- 29 Yrs  
0 40- 49 Yrs  
0 30- 39 Yrs  
0 40- 49 Yrs  
0 20- 29 Yrs  
0 60- 69 Yrs

0 70+ Yrs  
0 70+ Yrs  
0 60- 69 Yrs  
0 50- 59 Yrs  
0 60- 69 Yrs  
0 70+ Yrs  
0 40- 49 Yrs  
0 30- 39 Yrs  
0 70+ Yrs  
0 60- 69 Yrs  
0 50- 59 Yrs  
0 40- 49 Yrs  
0 20- 29 Yrs  
0 20- 29 Yrs  
0 30- 39 Yrs  
0 10- 19 Yrs  
0 10- 19 Yrs  
0 70+ Yrs  
0 60- 69 Yrs  
0 40- 49 Yrs  
0 10- 19 Yrs  
0 10- 19 Yrs  
0 20- 29 Yrs  
0 30- 39 Yrs  
0 30- 39 Yrs  
0 20- 29 Yrs  
0 40- 49 Yrs  
0 60- 69 Yrs  
0 50- 59 Yrs  
0 50- 59 Yrs  
0 70+ Yrs  
0 60- 69 Yrs  
0 10- 19 Yrs  
0 10- 19 Yrs  
0 40- 49 Yrs  
0 20- 29 Yrs  
0 30- 39 Yrs  
0 20- 29 Yrs  
0 50- 59 Yrs  
0 40- 49 Yrs  
0 40- 49 Yrs  
0 50- 59 Yrs  
0 40- 49 Yrs  
0 30- 39 Yrs  
0 50- 59 Yrs  
0 60- 69 Yrs  
0 60- 69 Yrs  
0 70+ Yrs  
0 70+ Yrs  
0 30- 39 Yrs

0 30- 39 Yrs  
0 40- 49 Yrs  
0 40- 49 Yrs  
0 50- 59 Yrs  
0 50- 59 Yrs  
0 60- 69 Yrs  
0 60- 69 Yrs  
0 70+ Yrs  
0 50- 59 Yrs  
0 50- 59 Yrs  
0 40- 49 Yrs  
0 40- 49 Yrs  
0 30- 39 Yrs  
0 70+ Yrs  
0 60- 69 Yrs  
0 60- 69 Yrs  
0 70+ Yrs  
0 30- 39 Yrs  
0 60- 69 Yrs  
0 40- 49 Yrs  
0 40- 49 Yrs  
0 60- 69 Yrs  
0 50- 59 Yrs  
0 50- 59 Yrs  
0 60- 69 Yrs  
0 50- 59 Yrs  
0 50- 59 Yrs  
0 40- 49 Yrs  
0 40- 49 Yrs  
0 30- 39 Yrs  
0 60- 69 Yrs  
0 70+ Yrs  
0 70+ Yrs  
0 60- 69 Yrs  
0 50- 59 Yrs  
0 60- 69 Yrs  
0 40- 49 Yrs  
0 50- 59 Yrs  
0 40- 49 Yrs  
0 30- 39 Yrs  
0 60- 69 Yrs  
0 60- 69 Yrs  
0 40- 49 Yrs  
0 30- 39 Yrs  
0 40- 49 Yrs  
0 50- 59 Yrs  
0 50- 59 Yrs  
0 70+ Yrs  
0 40- 49 Yrs  
0 50- 59 Yrs

0 60- 69 Yrs  
0 30- 39 Yrs  
0 50- 59 Yrs  
0 70+ Yrs  
0 40- 49 Yrs  
0 60- 69 Yrs  
0 50- 59 Yrs  
0 50- 59 Yrs  
0 40- 49 Yrs  
0 40- 49 Yrs  
0 70+ Yrs  
0 60- 69 Yrs  
0 30- 39 Yrs  
0 60- 69 Yrs  
0 70+ Yrs  
0 40- 49 Yrs  
0 40- 49 Yrs  
0 30- 39 Yrs  
0 60- 69 Yrs  
0 60- 69 Yrs  
0 50- 59 Yrs  
0 50- 59 Yrs  
0 10- 19 Yrs  
0 50- 59 Yrs  
0 60- 69 Yrs  
0 50- 59 Yrs  
0 70+ Yrs  
0 40- 49 Yrs  
0 50- 59 Yrs  
0 10- 19 Yrs  
0 40- 49 Yrs  
0 50- 59 Yrs  
0 60- 69 Yrs  
0 50- 59 Yrs  
0 60- 69 Yrs  
0 70+ Yrs  
0 50- 59 Yrs  
0 10- 19 Yrs  
0 40- 49 Yrs  
0 60- 69 Yrs  
0 50- 59 Yrs  
0 70+ Yrs  
0 40- 49 Yrs  
0 50- 59 Yrs  
0 10- 19 Yrs  
0 70+ Yrs  
0 50- 59 Yrs  
0 40- 49 Yrs  
0 60- 69 Yrs  
0 50- 59 Yrs

0 10- 19 Yrs  
0 70+ Yrs  
0 60- 69 Yrs  
0 50- 59 Yrs  
0 40- 49 Yrs  
0 10- 19 Yrs  
0 10- 19 Yrs  
0 40- 49 Yrs  
0 50- 59 Yrs  
0 50- 59 Yrs  
0 60- 69 Yrs  
0 70+ Yrs  
0 40- 49 Yrs  
0 50- 59 Yrs  
0 50- 59 Yrs  
0 60- 69 Yrs  
0 10- 19 Yrs  
0 70+ Yrs  
0 10- 19 Yrs  
0 40- 49 Yrs  
0 70+ Yrs  
0 60- 69 Yrs  
0 50- 59 Yrs  
0 40- 49 Yrs  
0 70+ Yrs  
0 10- 19 Yrs  
0 50- 59 Yrs  
0 50- 59 Yrs  
0 70+ Yrs  
0 60- 69 Yrs  
0 10- 19 Yrs  
0 40- 49 Yrs  
0 50- 59 Yrs  
0 50- 59 Yrs  
0 70+ Yrs  
0 60- 69 Yrs  
0 50- 59 Yrs  
0 40- 49 Yrs  
0 40- 49 Yrs  
0 60- 69 Yrs  
0 60- 69 Yrs  
0 70+ Yrs  
0 70+ Yrs  
0 20- 29 Yrs  
0 40- 49 Yrs  
0 20- 29 Yrs  
0 30- 39 Yrs  
0 40- 49 Yrs  
0 30- 39 Yrs  
0 50- 59 Yrs

0 10- 19 Yrs  
0 10- 19 Yrs  
0 50- 59 Yrs  
0 50- 59 Yrs  
0 10- 19 Yrs  
0 50- 59 Yrs  
0 40- 49 Yrs  
0 40- 49 Yrs  
0 50- 59 Yrs  
0 40- 49 Yrs  
0 30- 39 Yrs  
0 20- 29 Yrs  
0 50- 59 Yrs  
0 40- 49 Yrs  
0 40- 49 Yrs  
0 30- 39 Yrs  
0 40- 49 Yrs  
0 20- 29 Yrs  
0 10- 19 Yrs  
0 10- 19 Yrs  
0 50- 59 Yrs  
0 70+ Yrs  
0 70+ Yrs  
0 50- 59 Yrs  
0 60- 69 Yrs  
0 60- 69 Yrs  
0 40- 49 Yrs  
0 50- 59 Yrs  
0 40- 49 Yrs  
0 50- 59 Yrs  
0 50- 59 Yrs  
0 40- 49 Yrs  
0 50- 59 Yrs  
0 10- 19 Yrs  
0 50- 59 Yrs  
0 40- 49 Yrs  
0 50- 59 Yrs  
0 10- 19 Yrs  
0 40- 49 Yrs  
0 10- 19 Yrs  
0 50- 59 Yrs  
0 50- 59 Yrs  
0 60- 69 Yrs  
0 60- 69 Yrs  
0 50- 59 Yrs  
0 60- 69 Yrs  
0 60- 69 Yrs  
0 50- 59 Yrs  
0 50- 59 Yrs  
0 50- 59 Yrs

0 60- 69 Yrs  
0 50- 59 Yrs  
0 60- 69 Yrs  
0 60- 69 Yrs  
0 60- 69 Yrs  
0 50- 59 Yrs  
0 50- 59 Yrs  
0 60- 69 Yrs  
0 60- 69 Yrs  
0 50- 59 Yrs  
0 60- 69 Yrs  
0 60- 69 Yrs  
0 60- 69 Yrs  
0 50- 59 Yrs  
0 60- 69 Yrs  
0 60- 69 Yrs  
0 50- 59 Yrs  
0 50- 59 Yrs  
0 60- 69 Yrs  
0 60- 69 Yrs  
0 60- 69 Yrs  
0 50- 59 Yrs  
0 50- 59 Yrs  
0 60- 69 Yrs  
0 60- 69 Yrs  
0 50- 59 Yrs  
0 50- 59 Yrs  
0 60- 69 Yrs  
0 60- 69 Yrs  
0 50- 59 Yrs  
0 60- 69 Yrs  
0 50- 59 Yrs  
0 50- 59 Yrs  
0 60- 69 Yrs  
0 60- 69 Yrs  
0 60- 69 Yrs  
0 60- 69 Yrs

[illegible]

[illegible]

[illegible]

[illegible]

1 70+ Yrs  
1 60- 69 Yrs  
1 70+ Yrs  
1 10- 19 Yrs  
1 40- 49 Yrs  
1 60- 69 Yrs  
1 < 10 Yrs  
1 50- 59 Yrs  
1 60- 69 Yrs

1 60- 69 Yrs  
1 70+ Yrs  
1 70+ Yrs  
1 50- 59 Yrs  
1 40- 49 Yrs  
1 50- 59 Yrs  
1 60- 69 Yrs  
1 60- 69 Yrs  
1 60- 69 Yrs  
1 50- 59 Yrs  
1 30- 39 Yrs  
1 20- 29 Yrs  
1 70+ Yrs  
1 60- 69 Yrs  
1 70+ Yrs  
1 60- 69 Yrs  
1 50- 59 Yrs  
1 30- 39 Yrs  
1 10- 19 Yrs  
1 10- 19 Yrs  
1 50- 59 Yrs  
1 70+ Yrs  
1 40- 49 Yrs  
1 30- 39 Yrs  
1 10- 19 Yrs  
1 60- 69 Yrs  
1 70+ Yrs  
1 < 10 Yrs  
1 60- 69 Yrs  
1 60- 69 Yrs  
1 40- 49 Yrs  
1 30- 39 Yrs  
1 30- 39 Yrs  
1 70+ Yrs  
1 50- 59 Yrs  
1 50- 59 Yrs  
1 70+ Yrs  
1 40- 49 Yrs  
1 50- 59 Yrs  
1 60- 69 Yrs  
1 70+ Yrs  
1 < 10 Yrs  
1 70+ Yrs  
1 60- 69 Yrs  
1 60- 69 Yrs  
1 70+ Yrs  
1 20- 29 Yrs  
1 70+ Yrs  
1 50- 59 Yrs  
1 40- 49 Yrs

1 40- 49 Yrs  
1 30- 39 Yrs  
1 60- 69 Yrs  
1 70+ Yrs  
1 60- 69 Yrs  
1 60- 69 Yrs  
1 10- 19 Yrs  
1 50- 59 Yrs  
1 50- 59 Yrs  
1 70+ Yrs  
1 70+ Yrs  
1 50- 59 Yrs  
1 30- 39 Yrs  
1 10- 19 Yrs  
1 20- 29 Yrs  
1 20- 29 Yrs  
1 60- 69 Yrs  
1 10- 19 Yrs  
1 70+ Yrs  
1 50- 59 Yrs  
1 30- 39 Yrs  
1 20- 29 Yrs  
1 20- 29 Yrs  
1 60- 69 Yrs  
1 60- 69 Yrs  
1 70+ Yrs  
1 10- 19 Yrs  
1 < 10 Yrs  
1 60- 69 Yrs  
1 70+ Yrs  
1 70+ Yrs  
1 30- 39 Yrs  
1 70+ Yrs  
1 50- 59 Yrs  
1  
1 50- 59 Yrs  
1 10- 19 Yrs  
1 10- 19 Yrs  
1 70+ Yrs  
1 70+ Yrs  
1 20- 29 Yrs  
1 30- 39 Yrs  
1 20- 29 Yrs  
1 10- 19 Yrs  
1  
1  
1 10- 19 Yrs  
1 10- 19 Yrs  
1 20- 29 Yrs  
1

1 50- 59 Yrs  
1  
1 60- 69 Yrs  
1 40- 49 Yrs  
1 70+ Yrs  
1 50- 59 Yrs  
1  
1  
1 20- 29 Yrs  
1 10- 19 Yrs  
1  
1  
1  
1  
1  
1  
1  
1  
1 10- 19 Yrs  
1 50- 59 Yrs  
1 20- 29 Yrs  
1  
1  
1 50- 59 Yrs  
1  
1  
1 50- 59 Yrs  
1  
1 10- 19 Yrs  
1 40- 49 Yrs  
1 10- 19 Yrs  
1  
1  
1 10- 19 Yrs  
1 40- 49 Yrs  
1 10- 19 Yrs  
1  
1  
1 20- 29 Yrs  
1 20- 29 Yrs  
1  
1 60- 69 Yrs  
1 30- 39 Yrs  
1 20- 29 Yrs  
1 20- 29 Yrs  
1 30- 39 Yrs  
1 40- 49 Yrs  
1 60- 69 Yrs  
1 60- 69 Yrs  
1 50- 59 Yrs

1 30- 39 Yrs  
1 40- 49 Yrs  
1 50- 59 Yrs  
1 30- 39 Yrs  
1 70+ Yrs  
1 50- 59 Yrs  
1 60- 69 Yrs  
1 20- 29 Yrs  
1 50- 59 Yrs  
1 30- 39 Yrs  
1 60- 69 Yrs  
1 50- 59 Yrs  
1 50- 59 Yrs  
1 70+ Yrs  
1 70+ Yrs  
1 60- 69 Yrs  
1 40- 49 Yrs  
1 30- 39 Yrs  
1 60- 69 Yrs  
1 40- 49 Yrs  
1 70+ Yrs  
1 50- 59 Yrs  
1 50- 59 Yrs  
1 40- 49 Yrs  
1 60- 69 Yrs  
1 20- 29 Yrs  
1 30- 39 Yrs  
1 50- 59 Yrs  
1 50- 59 Yrs  
1 20- 29 Yrs  
1 70+ Yrs  
1 70+ Yrs  
1 60- 69 Yrs  
1 50- 59 Yrs  
1 30- 39 Yrs  
1 60- 69 Yrs  
1 50- 59 Yrs  
1 50- 59 Yrs  
1 60- 69 Yrs  
1 70+ Yrs  
1 20- 29 Yrs  
1 70+ Yrs  
1 30- 39 Yrs  
1 70+ Yrs  
1 60- 69 Yrs  
1 50- 59 Yrs  
1 50- 59 Yrs  
1 30- 39 Yrs  
1 40- 49 Yrs  
1 30- 39 Yrs

1 70+ Yrs  
1 50- 59 Yrs  
1 60- 69 Yrs  
1 70+ Yrs  
1 60- 69 Yrs  
1 30- 39 Yrs  
1 60- 69 Yrs  
1 20- 29 Yrs  
1 30- 39 Yrs  
1 40- 49 Yrs  
1 60- 69 Yrs  
1 60- 69 Yrs  
1 50- 59 Yrs  
1 50- 59 Yrs  
1 70+ Yrs  
1 60- 69 Yrs  
1 60- 69 Yrs  
1 40- 49 Yrs  
1 50- 59 Yrs  
1 50- 59 Yrs  
1 30- 39 Yrs  
1 70+ Yrs  
1 60- 69 Yrs  
1 70+ Yrs  
1 60- 69 Yrs  
1 60- 69 Yrs  
1 40- 49 Yrs  
1 30- 39 Yrs  
1 50- 59 Yrs  
1 50- 59 Yrs  
1 60- 69 Yrs  
1 40- 49 Yrs  
1 60- 69 Yrs  
1 40- 49 Yrs  
1 30- 39 Yrs  
1 40- 49 Yrs  
1 20- 29 Yrs  
1 50- 59 Yrs  
1 20- 29 Yrs  
1 40- 49 Yrs  
1 20- 29 Yrs  
1 40- 49 Yrs  
1 30- 39 Yrs  
1 70+ Yrs  
1 50- 59 Yrs  
1 50- 59 Yrs  
1 60- 69 Yrs  
1 70+ Yrs  
1 70+ Yrs  
1 20- 29 Yrs

1 40- 49 Yrs  
1 50- 59 Yrs  
1 30- 39 Yrs  
1 40- 49 Yrs  
1 20- 29 Yrs  
1 40- 49 Yrs  
1 60- 69 Yrs  
1 70+ Yrs  
1 50- 59 Yrs  
1 60- 69 Yrs  
1 20- 29 Yrs  
1 40- 49 Yrs  
1 60- 69 Yrs  
1 30- 39 Yrs  
1 70+ Yrs  
1 60- 69 Yrs  
1 40- 49 Yrs  
1 70+ Yrs  
1 60- 69 Yrs  
1 50- 59 Yrs  
1 70+ Yrs  
1 60- 69 Yrs  
1 60- 69 Yrs  
1 40- 49 Yrs  
1 40- 49 Yrs  
1 70+ Yrs  
1 70+ Yrs  
1 50- 59 Yrs  
1 50- 59 Yrs  
1 70+ Yrs  
1 50- 59 Yrs  
1 60- 69 Yrs  
1 70+ Yrs  
1 50- 59 Yrs  
1 30- 39 Yrs  
1 40- 49 Yrs  
1 60- 69 Yrs  
3 70+ Yrs  
2 60- 69 Yrs  
4 60- 69 Yrs  
5  
2 60- 69 Yrs  
2 20- 29 Yrs  
2 10- 19 Yrs  
2 60- 69 Yrs  
3 50- 59 Yrs  
14  
19 60- 69 Yrs  
12 60- 69 Yrs  
15 50- 59 Yrs

23 50- 59 Yrs  
29  
6  
13  
2  
21  
2  
3  
3  
4 60- 69 Yrs  
3 70+ Yrs  
6  
6 60- 69 Yrs  
3 60- 69 Yrs  
3  
5 50- 59 Yrs  
3  
5  
3 70+ Yrs  
2 50- 59 Yrs  
3 70+ Yrs  
2 60- 69 Yrs  
2 60- 69 Yrs  
2 60- 69 Yrs  
3  
2 60- 69 Yrs  
3 40- 49 Yrs  
2 70+ Yrs  
4 30- 39 Yrs  
2 40- 49 Yrs  
3  
7  
2  
2 60- 69 Yrs  
9  
8 50- 59 Yrs  
3 50- 59 Yrs  
5 60- 69 Yrs  
5  
2  
6  
11 50- 59 Yrs  
5 50- 59 Yrs  
3 60- 69 Yrs  
8 60- 69 Yrs  
3  
4  
2  
6  
2

6  
2  
7  
3  
5 50- 59 Yrs  
3 50- 59 Yrs  
10 60- 69 Yrs  
17 60- 69 Yrs  
12  
10  
2 70+ Yrs  
2 50- 59 Yrs  
2 70+ Yrs  
2 30- 39 Yrs  
3 20- 29 Yrs  
4 20- 29 Yrs  
5 50- 59 Yrs  
5 40- 49 Yrs  
4 40- 49 Yrs  
4 30- 39 Yrs  
3 50- 59 Yrs  
6 30- 39 Yrs  
2 20- 29 Yrs  
6 30- 39 Yrs  
2 20- 29 Yrs  
2 70+ Yrs  
2 50- 59 Yrs  
4 30- 39 Yrs  
7 40- 49 Yrs  
4 40- 49 Yrs  
273 40- 49 Yrs  
178 30- 39 Yrs  
234 40- 49 Yrs  
9 20- 29 Yrs  
4 20- 29 Yrs  
204 30- 39 Yrs  
9 60- 69 Yrs  
9 60- 69 Yrs  
142 50- 59 Yrs  
114 50- 59 Yrs  
2 50- 59 Yrs  
2 40- 49 Yrs  
3 40- 49 Yrs  
2 30- 39 Yrs  
8 70+ Yrs  
8 70+ Yrs  
11 60- 69 Yrs  
9 60- 69 Yrs  
224 50- 59 Yrs  
149 50- 59 Yrs

191 40- 49 Yrs  
141 30- 39 Yrs  
124 30- 39 Yrs  
16 20- 29 Yrs  
21 20- 29 Yrs  
201 40- 49 Yrs  
6 50- 59 Yrs  
7 50- 59 Yrs  
4 20- 29 Yrs  
8 30- 39 Yrs  
7 30- 39 Yrs  
9 40- 49 Yrs  
11 40- 49 Yrs  
5 20- 29 Yrs  
3 50- 59 Yrs  
2 50- 59 Yrs  
8 40- 49 Yrs  
6 20- 29 Yrs  
5 20- 29 Yrs  
4 30- 39 Yrs  
8 40- 49 Yrs  
7 30- 39 Yrs  
5 30- 39 Yrs  
8 50- 59 Yrs  
2 10- 19 Yrs  
4 30- 39 Yrs  
4 60- 69 Yrs  
8 40- 49 Yrs  
2 50- 59 Yrs  
14 40- 49 Yrs  
2 50- 59 Yrs  
3 70+ Yrs  
3 70+ Yrs  
17 60- 69 Yrs  
19 60- 69 Yrs  
21 50- 59 Yrs  
20 50- 59 Yrs  
22 40- 49 Yrs  
10 40- 49 Yrs  
2 50- 59 Yrs  
2 60- 69 Yrs  
2 50- 59 Yrs  
3 40- 49 Yrs  
2 30- 39 Yrs  
5 < 10 Yrs  
6 70+ Yrs  
30 60- 69 Yrs  
17 60- 69 Yrs  
12 70+ Yrs  
13 30- 39 Yrs

7 30- 39 Yrs  
6 20- 29 Yrs  
2 20- 29 Yrs  
36 50- 59 Yrs  
21 50- 59 Yrs  
31 40- 49 Yrs  
15 40- 49 Yrs  
3 10- 19 Yrs  
2 10- 19 Yrs  
9 10- 19 Yrs  
4 10- 19 Yrs  
7 20- 29 Yrs  
3 20- 29 Yrs  
12 30- 39 Yrs  
4 30- 39 Yrs  
11 40- 49 Yrs  
3 40- 49 Yrs  
7 50- 59 Yrs  
6 50- 59 Yrs  
3 60- 69 Yrs  
2 60- 69 Yrs  
3 < 10 Yrs  
2 < 10 Yrs  
32 40- 49 Yrs  
12 60- 69 Yrs  
19 30- 39 Yrs  
29 50- 59 Yrs  
20 50- 59 Yrs  
2 70+ Yrs  
11 60- 69 Yrs  
26 40- 49 Yrs  
2 10- 19 Yrs  
20 30- 39 Yrs  
3 10- 19 Yrs  
12 20- 29 Yrs  
7 20- 29 Yrs  
2 10- 19 Yrs  
4 60- 69 Yrs  
2 60- 69 Yrs  
11 50- 59 Yrs  
7 50- 59 Yrs  
13 40- 49 Yrs  
20 40- 49 Yrs  
4 10- 19 Yrs  
5 20- 29 Yrs  
6 20- 29 Yrs  
19 30- 39 Yrs  
7 30- 39 Yrs  
2 < 10 Yrs  
19 40- 49 Yrs

30 40- 49 Yrs  
10 30- 39 Yrs  
14 30- 39 Yrs  
25 50- 59 Yrs  
12 70+ Yrs  
7 60- 69 Yrs  
5 20- 29 Yrs  
15 60- 69 Yrs  
20 50- 59 Yrs  
3 20- 29 Yrs  
3 10- 19 Yrs  
10 70+ Yrs  
2 < 10 Yrs  
3 < 10 Yrs  
5 60- 69 Yrs  
53 40- 49 Yrs  
26 50- 59 Yrs  
15 40- 49 Yrs  
10 50- 59 Yrs  
2 60- 69 Yrs  
3 < 10 Yrs  
9 70+ Yrs  
3 70+ Yrs  
2 < 10 Yrs  
12 10- 19 Yrs  
7 20- 29 Yrs  
6 30- 39 Yrs  
32 30- 39 Yrs  
20 20- 29 Yrs  
2 10- 19 Yrs  
12 50- 59 Yrs  
32 40- 49 Yrs  
9 10- 19 Yrs  
7 30- 39 Yrs  
27 30- 39 Yrs  
30 50- 59 Yrs  
10 20- 29 Yrs  
6 10- 19 Yrs  
9 20- 29 Yrs  
5 60- 69 Yrs  
11 40- 49 Yrs  
24 50- 59 Yrs  
6 < 10 Yrs  
26 20- 29 Yrs  
22 50- 59 Yrs  
11 20- 29 Yrs  
8 10- 19 Yrs  
2 70+ Yrs  
11 60- 69 Yrs  
3 70+ Yrs

3 10- 19 Yrs  
4 < 10 Yrs  
12 60- 69 Yrs  
13 30- 39 Yrs  
17 40- 49 Yrs  
29 40- 49 Yrs  
17 30- 39 Yrs  
2 10- 19 Yrs  
25 30- 39 Yrs  
5 20- 29 Yrs  
10 20- 29 Yrs  
20 30- 39 Yrs  
3 10- 19 Yrs  
2 < 10 Yrs  
32 50- 59 Yrs  
36 40- 49 Yrs  
31 50- 59 Yrs  
27 40- 49 Yrs  
6 70+ Yrs  
7 60- 69 Yrs  
2 60- 69 Yrs  
4 60- 69 Yrs  
4 50- 59 Yrs  
7 60- 69 Yrs  
2 30- 39 Yrs  
4 40- 49 Yrs  
6 50- 59 Yrs  
2 10- 19 Yrs  
3 70+ Yrs  
12 < 10 Yrs  
26 < 10 Yrs  
7 50- 59 Yrs  
10 50- 59 Yrs  
3 40- 49 Yrs  
6 40- 49 Yrs  
4 < 10 Yrs  
9 < 10 Yrs  
7 60- 69 Yrs  
6 60- 69 Yrs  
5 70+ Yrs  
14 70+ Yrs  
5 30- 39 Yrs  
3 20- 29 Yrs  
4 20- 29 Yrs  
3 40- 49 Yrs  
8 40- 49 Yrs  
4 50- 59 Yrs  
14 50- 59 Yrs  
3 20- 29 Yrs  
2 20- 29 Yrs

4 30- 39 Yrs  
5 70+ Yrs  
7 70+ Yrs  
10 < 10 Yrs  
23 < 10 Yrs  
2 10- 19 Yrs  
15 60- 69 Yrs  
3 40- 49 Yrs  
9 40- 49 Yrs  
5 50- 59 Yrs  
3 50- 59 Yrs  
4 < 10 Yrs  
5 < 10 Yrs  
3 60- 69 Yrs  
3 70+ Yrs  
3 60- 69 Yrs  
2 20- 29 Yrs  
2 10- 19 Yrs  
2 10- 19 Yrs  
2 40- 49 Yrs  
4 60- 69 Yrs  
3 50- 59 Yrs  
11 < 10 Yrs  
10 70+ Yrs  
6 30- 39 Yrs  
6 30- 39 Yrs  
10 40- 49 Yrs  
7 < 10 Yrs  
3 50- 59 Yrs  
10 60- 69 Yrs  
3 30- 39 Yrs  
3 70+ Yrs  
5 40- 49 Yrs  
2 10- 19 Yrs  
2 20- 29 Yrs  
12 < 10 Yrs  
6 30- 39 Yrs  
2 70+ Yrs  
4 60- 69 Yrs  
14 < 10 Yrs  
3 50- 59 Yrs  
8 60- 69 Yrs  
10 40- 49 Yrs  
22 50- 59 Yrs  
8 60- 69 Yrs  
16 50- 59 Yrs  
6 30- 39 Yrs  
6 70+ Yrs  
5 70+ Yrs  
5 60- 69 Yrs

3 30- 39 Yrs  
15 < 10 Yrs  
8 < 10 Yrs  
3 20- 29 Yrs  
2 10- 19 Yrs  
2 10- 19 Yrs  
4 30- 39 Yrs  
4 30- 39 Yrs  
2 20- 29 Yrs  
2  
3  
16 70+ Yrs  
9 60- 69 Yrs  
8 70+ Yrs  
6 40- 49 Yrs  
8 50- 59 Yrs  
10 60- 69 Yrs  
15 50- 59 Yrs  
16 40- 49 Yrs  
5 30- 39 Yrs  
7 40- 49 Yrs  
3 40- 49 Yrs  
6 50- 59 Yrs  
3 50- 59 Yrs  
4 60- 69 Yrs  
5 60- 69 Yrs  
5 70+ Yrs  
5 70+ Yrs  
2 10- 19 Yrs  
2 10- 19 Yrs  
14 40- 49 Yrs  
5 40- 49 Yrs  
3 20- 29 Yrs  
4 30- 39 Yrs  
2 20- 29 Yrs  
9 30- 39 Yrs  
7 70+ Yrs  
14 70+ Yrs  
8 60- 69 Yrs  
8 50- 59 Yrs  
9 60- 69 Yrs  
2  
3  
13 50- 59 Yrs  
2  
7 30- 39 Yrs  
12 70+ Yrs  
3 30- 39 Yrs  
2 10- 19 Yrs  
2 20- 29 Yrs

3  
2 10- 19 Yrs  
5 40- 49 Yrs  
7 60- 69 Yrs  
6 50- 59 Yrs  
8 60- 69 Yrs  
11 50- 59 Yrs  
6 70+ Yrs  
12 40- 49 Yrs  
10 30- 39 Yrs  
7 30- 39 Yrs  
11 40- 49 Yrs  
17 40- 49 Yrs  
2 20- 29 Yrs  
2 10- 19 Yrs  
2  
10 60- 69 Yrs  
10 70+ Yrs  
9 50- 59 Yrs  
12 50- 59 Yrs  
7 70+ Yrs  
8 60- 69 Yrs  
3 20- 29 Yrs  
18 50- 59 Yrs  
10 50- 59 Yrs  
18 40- 49 Yrs  
7 40- 49 Yrs  
3  
9 70+ Yrs  
19 70+ Yrs  
4  
12 60- 69 Yrs  
11 60- 69 Yrs  
2 10- 19 Yrs  
3 10- 19 Yrs  
5 30- 39 Yrs  
5 30- 39 Yrs  
4 20- 29 Yrs  
7 50- 59 Yrs  
3 40- 49 Yrs  
3 30- 39 Yrs  
2 10- 19 Yrs  
2 20- 29 Yrs  
2 20- 29 Yrs  
5 40- 49 Yrs  
3 30- 39 Yrs  
12 60- 69 Yrs  
2  
13 70+ Yrs  
6 70+ Yrs

12 50- 59 Yrs  
3  
7 60- 69 Yrs  
3 30- 39 Yrs  
10 50- 59 Yrs  
4 70+ Yrs  
3 40- 49 Yrs  
4 70+ Yrs  
8 50- 59 Yrs  
4 60- 69 Yrs  
7 30- 39 Yrs  
4 60- 69 Yrs  
7 40- 49 Yrs  
2 20- 29 Yrs  
5 70+ Yrs  
2  
6 60- 69 Yrs  
15 40- 49 Yrs  
12 60- 69 Yrs  
8 50- 59 Yrs  
4 30- 39 Yrs  
8 30- 39 Yrs  
5 70+ Yrs  
15 50- 59 Yrs  
8 40- 49 Yrs  
16 50- 59 Yrs  
11 50- 59 Yrs  
11 60- 69 Yrs  
7 70+ Yrs  
7 70+ Yrs  
4  
13 60- 69 Yrs  
8 30- 39 Yrs  
3 20- 29 Yrs  
5 40- 49 Yrs  
14 40- 49 Yrs  
4 30- 39 Yrs  
4 40- 49 Yrs  
4 70+ Yrs  
4 50- 59 Yrs  
9 60- 69 Yrs  
5 40- 49 Yrs  
13 60- 69 Yrs  
11 70+ Yrs  
18 70+ Yrs  
4 70+ Yrs  
6 70+ Yrs  
7 50- 59 Yrs  
6 70+ Yrs  
4 70+ Yrs

6 60- 69 Yrs  
5 40- 49 Yrs  
7 60- 69 Yrs  
6 70+ Yrs  
5 60- 69 Yrs  
8 70+ Yrs  
40 40- 49 Yrs  
4 40- 49 Yrs  
21 40- 49 Yrs  
4 40- 49 Yrs  
7 50- 59 Yrs  
8 70+ Yrs  
37 50- 59 Yrs  
9 60- 69 Yrs  
6 60- 69 Yrs  
7 60- 69 Yrs  
4 50- 59 Yrs  
19 70+ Yrs  
17 70+ Yrs  
8 70+ Yrs  
20 50- 59 Yrs  
17 60- 69 Yrs  
46 60- 69 Yrs  
9 70+ Yrs  
4 70+ Yrs  
5 70+ Yrs  
4 60- 69 Yrs  
14 50- 59 Yrs  
4 70+ Yrs  
12 60- 69 Yrs  
5 60- 69 Yrs  
6 50- 59 Yrs  
11 70+ Yrs  
5 30- 39 Yrs  
7 70+ Yrs  
7 30- 39 Yrs  
8 40- 49 Yrs  
9 40- 49 Yrs  
13 50- 59 Yrs  
11 50- 59 Yrs  
20 60- 69 Yrs  
17 60- 69 Yrs  
4 70+ Yrs  
6 70+ Yrs  
11 70+ Yrs  
5 70+ Yrs  
4 40- 49 Yrs  
16 70+ Yrs  
6 50- 59 Yrs  
11 70+ Yrs

4 40- 49 Yrs  
5 60- 69 Yrs  
8 60- 69 Yrs  
6 60- 69 Yrs  
5 70+ Yrs  
13 70+ Yrs  
6 40- 49 Yrs  
5 60- 69 Yrs  
6 50- 59 Yrs  
8 60- 69 Yrs  
14 70+ Yrs  
4 50- 59 Yrs  
9 70+ Yrs  
7 70+ Yrs  
4 50- 59 Yrs  
8 60- 69 Yrs  
6 70+ Yrs  
4 60- 69 Yrs  
4 70+ Yrs  
11 70+ Yrs  
6 70+ Yrs  
14 70+ Yrs  
7 50- 59 Yrs  
6 60- 69 Yrs  
5 40- 49 Yrs  
10 50- 59 Yrs  
6 50- 59 Yrs  
20 40- 49 Yrs  
4 60- 69 Yrs  
11 60- 69 Yrs  
10 30- 39 Yrs  
4 60- 69 Yrs  
12 70+ Yrs  
5 70+ Yrs  
11 60- 69 Yrs  
4 50- 59 Yrs  
8 60- 69 Yrs  
4 60- 69 Yrs  
11 70+ Yrs  
4 70+ Yrs  
7 70+ Yrs  
20 70+ Yrs  
31 60- 69 Yrs  
36 60- 69 Yrs  
19 50- 59 Yrs  
27 50- 59 Yrs  
12 40- 49 Yrs  
11 70+ Yrs  
7 30- 39 Yrs  
6 30- 39 Yrs

10 40- 49 Yrs  
14 40- 49 Yrs  
9 70+ Yrs  
4 50- 59 Yrs  
6 60- 69 Yrs  
13 70+ Yrs  
5 70+ Yrs  
5 70+ Yrs  
4 50- 59 Yrs  
18 60- 69 Yrs  
15 50- 59 Yrs  
34 40- 49 Yrs  
20 50- 59 Yrs  
20 40- 49 Yrs  
10 60- 69 Yrs  
9 70+ Yrs  
6 60- 69 Yrs  
11 70+ Yrs  
4 30- 39 Yrs  
15 70+ Yrs  
6 60- 69 Yrs  
4 70+ Yrs  
16 70+ Yrs  
5 50- 59 Yrs  
9 70+ Yrs  
10 60- 69 Yrs  
4 50- 59 Yrs  
4 60- 69 Yrs  
5 30- 39 Yrs  
11 70+ Yrs  
24 70+ Yrs  
8 70+ Yrs  
6 70+ Yrs  
6 50- 59 Yrs  
4 60- 69 Yrs  
15 50- 59 Yrs  
16 40- 49 Yrs  
5 40- 49 Yrs  
8 70+ Yrs  
6 50- 59 Yrs  
19 70+ Yrs  
6 60- 69 Yrs  
6 70+ Yrs  
19 70+ Yrs  
11 50- 59 Yrs  
5 70+ Yrs  
7 40- 49 Yrs  
10 50- 59 Yrs  
4 30- 39 Yrs  
5 60- 69 Yrs

7 70+ Yrs  
6 60- 69 Yrs  
7 60- 69 Yrs  
8 40- 49 Yrs  
7 50- 59 Yrs  
4 50- 59 Yrs  
5 40- 49 Yrs  
6 60- 69 Yrs  
5 70+ Yrs  
6 70+ Yrs  
4 50- 59 Yrs  
16 70+ Yrs  
8 70+ Yrs  
16 60- 69 Yrs  
8 30- 39 Yrs  
7 30- 39 Yrs  
8 40- 49 Yrs  
5 10- 19 Yrs  
7 70+ Yrs  
4 50- 59 Yrs  
4 50- 59 Yrs  
19 70+ Yrs  
11 60- 69 Yrs  
5 50- 59 Yrs  
4 60- 69 Yrs  
4 70+ Yrs  
5 70+ Yrs  
4 60- 69 Yrs  
5 70+ Yrs  
12 60- 69 Yrs  
5 60- 69 Yrs  
6 50- 59 Yrs  
11 60- 69 Yrs  
11 70+ Yrs  
11 70+ Yrs  
9 50- 59 Yrs  
7 70+ Yrs  
4 70+ Yrs  
12 60- 69 Yrs  
10 50- 59 Yrs  
7 40- 49 Yrs  
5 30- 39 Yrs  
10 20- 29 Yrs  
4 60- 69 Yrs  
13 70+ Yrs  
6 70+ Yrs  
6 30- 39 Yrs  
12 50- 59 Yrs  
12 40- 49 Yrs  
13 40- 49 Yrs

5 60- 69 Yrs  
5 40- 49 Yrs  
11 50- 59 Yrs  
5 20- 29 Yrs  
10 60- 69 Yrs  
13 50- 59 Yrs  
12 30- 39 Yrs  
6 70+ Yrs  
6 70+ Yrs  
3 60- 69 Yrs  
3 30- 39 Yrs  
3 60- 69 Yrs  
3 70+ Yrs  
3 60- 69 Yrs  
3 60- 69 Yrs  
3 50- 59 Yrs  
3 70+ Yrs  
3 70+ Yrs  
3 70+ Yrs  
3 50- 59 Yrs  
3 40- 49 Yrs  
3 40- 49 Yrs  
3 50- 59 Yrs  
3 30- 39 Yrs  
3 70+ Yrs  
3 70+ Yrs  
3 60- 69 Yrs  
3 50- 59 Yrs  
3 30- 39 Yrs  
3 60- 69 Yrs  
3 40- 49 Yrs  
3 60- 69 Yrs  
3 30- 39 Yrs  
3 70+ Yrs  
3 60- 69 Yrs  
3 50- 59 Yrs  
3 60- 69 Yrs  
3 50- 59 Yrs  
3 60- 69 Yrs  
3 40- 49 Yrs  
3 70+ Yrs  
3 60- 69 Yrs  
3 60- 69 Yrs  
3 60- 69 Yrs  
3 70+ Yrs  
3 70+ Yrs  
3 70+ Yrs  
3 60- 69 Yrs  
3 60- 69 Yrs  
3 40- 49 Yrs

3 40- 49 Yrs  
3 40- 49 Yrs  
3 70+ Yrs  
3 60- 69 Yrs  
3 60- 69 Yrs  
3 60- 69 Yrs  
3 50- 59 Yrs  
3 30- 39 Yrs  
3 50- 59 Yrs  
3 40- 49 Yrs  
3 30- 39 Yrs  
3 40- 49 Yrs  
3 60- 69 Yrs  
3 60- 69 Yrs  
3 70+ Yrs  
3 60- 69 Yrs  
3 50- 59 Yrs  
3 30- 39 Yrs  
2 50- 59 Yrs  
2 60- 69 Yrs  
2 50- 59 Yrs  
2 30- 39 Yrs  
2 70+ Yrs  
2 60- 69 Yrs  
2 70+ Yrs  
2 30- 39 Yrs  
2 50- 59 Yrs  
2 50- 59 Yrs  
2 40- 49 Yrs  
2 50- 59 Yrs  
2 60- 69 Yrs  
2 40- 49 Yrs  
2 70+ Yrs  
2 50- 59 Yrs  
2 60- 69 Yrs  
2 70+ Yrs  
2 40- 49 Yrs  
2 30- 39 Yrs  
2 40- 49 Yrs  
2 70+ Yrs  
2 60- 69 Yrs  
2 60- 69 Yrs  
2 60- 69 Yrs  
2 50- 59 Yrs  
2 70+ Yrs  
2 70+ Yrs  
2 60- 69 Yrs  
2 30- 39 Yrs  
2 50- 59 Yrs  
2 40- 49 Yrs

2 40- 49 Yrs  
2 70+ Yrs  
2 50- 59 Yrs  
2 40- 49 Yrs  
2 70+ Yrs  
2 60- 69 Yrs  
2 40- 49 Yrs  
2 50- 59 Yrs  
2 20- 29 Yrs  
2 60- 69 Yrs  
2 50- 59 Yrs  
2 50- 59 Yrs  
2 30- 39 Yrs  
2 70+ Yrs  
2 50- 59 Yrs  
2 70+ Yrs  
2 50- 59 Yrs  
2 60- 69 Yrs  
2 60- 69 Yrs  
2 60- 69 Yrs  
2 70+ Yrs  
2 30- 39 Yrs  
2 50- 59 Yrs  
2 60- 69 Yrs  
2 50- 59 Yrs  
2 60- 69 Yrs  
2 60- 69 Yrs  
2 70+ Yrs  
2 30- 39 Yrs  
2 70+ Yrs  
2 60- 69 Yrs  
2 60- 69 Yrs  
2 60- 69 Yrs  
2 20- 29 Yrs  
2 70+ Yrs  
2 60- 69 Yrs  
2 70+ Yrs  
2 50- 59 Yrs  
2 70+ Yrs  
2 40- 49 Yrs  
2 70+ Yrs  
2 70+ Yrs  
2 70+ Yrs  
2 60- 69 Yrs  
10 10- 19 Yrs  
10 10- 19 Yrs  
9 10- 19 Yrs  
8 10- 19 Yrs  
6 10- 19 Yrs  
4 10- 19 Yrs

4 10- 19 Yrs  
5 10- 19 Yrs  
12 10- 19 Yrs  
4 10- 19 Yrs  
8 10- 19 Yrs  
17 10- 19 Yrs  
4 10- 19 Yrs  
4 10- 19 Yrs  
6 10- 19 Yrs  
5 10- 19 Yrs  
4 < 10 Yrs  
4 10- 19 Yrs  
10 10- 19 Yrs  
6 10- 19 Yrs  
5 10- 19 Yrs  
10 10- 19 Yrs  
7 < 10 Yrs  
4 < 10 Yrs  
9 10- 19 Yrs  
8 < 10 Yrs  
4 < 10 Yrs  
19 10- 19 Yrs  
5 < 10 Yrs  
8 10- 19 Yrs  
5 10- 19 Yrs  
4 10- 19 Yrs  
4 < 10 Yrs  
6 10- 19 Yrs  
10 10- 19 Yrs  
6 10- 19 Yrs  
4 10- 19 Yrs  
8 10- 19 Yrs  
4 10- 19 Yrs  
8 10- 19 Yrs  
9 10- 19 Yrs  
6 10- 19 Yrs  
4 < 10 Yrs  
4 10- 19 Yrs  
6 20- 29 Yrs  
7 20- 29 Yrs  
41 20- 29 Yrs  
23 20- 29 Yrs  
16 20- 29 Yrs  
5 20- 29 Yrs  
11 20- 29 Yrs  
8 20- 29 Yrs  
7 20- 29 Yrs  
4 20- 29 Yrs  
4 20- 29 Yrs  
4 20- 29 Yrs

20 20- 29 Yrs  
10 20- 29 Yrs  
5 20- 29 Yrs  
16 20- 29 Yrs  
7 20- 29 Yrs  
6 20- 29 Yrs  
10 20- 29 Yrs  
26 20- 29 Yrs  
20 20- 29 Yrs  
13 20- 29 Yrs  
11 20- 29 Yrs  
26 20- 29 Yrs  
20 20- 29 Yrs  
6 20- 29 Yrs  
20 20- 29 Yrs  
14 20- 29 Yrs  
4 20- 29 Yrs  
4 20- 29 Yrs  
4 20- 29 Yrs  
4 20- 29 Yrs  
68 20- 29 Yrs  
6 20- 29 Yrs  
53 20- 29 Yrs  
13 20- 29 Yrs  
7 20- 29 Yrs  
5 20- 29 Yrs  
17 20- 29 Yrs  
10 20- 29 Yrs  
56 20- 29 Yrs  
22 20- 29 Yrs  
12 20- 29 Yrs  
48 20- 29 Yrs  
8 20- 29 Yrs  
24 20- 29 Yrs  
20 20- 29 Yrs  
11 20- 29 Yrs  
26 20- 29 Yrs  
5 20- 29 Yrs  
4 20- 29 Yrs  
4 20- 29 Yrs  
5 20- 29 Yrs  
20 20- 29 Yrs  
10 20- 29 Yrs  
4 30- 39 Yrs  
8 30- 39 Yrs  
4 30- 39 Yrs  
8 30- 39 Yrs  
10 30- 39 Yrs  
8 30- 39 Yrs  
15 30- 39 Yrs

4 30- 39 Yrs  
11 30- 39 Yrs  
50 30- 39 Yrs  
62 30- 39 Yrs  
14 30- 39 Yrs  
32 30- 39 Yrs  
58 30- 39 Yrs  
79 30- 39 Yrs  
5 30- 39 Yrs  
4 30- 39 Yrs  
9 30- 39 Yrs  
27 30- 39 Yrs  
14 30- 39 Yrs  
47 30- 39 Yrs  
4 30- 39 Yrs  
29 30- 39 Yrs  
4 30- 39 Yrs  
4 30- 39 Yrs  
7 30- 39 Yrs  
12 30- 39 Yrs  
12 30- 39 Yrs  
26 30- 39 Yrs  
18 30- 39 Yrs  
7 30- 39 Yrs  
8 30- 39 Yrs  
9 30- 39 Yrs  
12 30- 39 Yrs  
18 30- 39 Yrs  
7 30- 39 Yrs  
4 30- 39 Yrs  
4 30- 39 Yrs  
15 30- 39 Yrs  
13 30- 39 Yrs  
5 30- 39 Yrs  
25 30- 39 Yrs  
7 30- 39 Yrs  
8 30- 39 Yrs  
7 30- 39 Yrs  
23 30- 39 Yrs  
6 30- 39 Yrs  
30 30- 39 Yrs  
5 30- 39 Yrs  
26 30- 39 Yrs  
12 30- 39 Yrs  
4 30- 39 Yrs  
73 30- 39 Yrs  
82 30- 39 Yrs  
6 30- 39 Yrs  
8 30- 39 Yrs  
37 30- 39 Yrs

5 30- 39 Yrs  
21 30- 39 Yrs  
31 30- 39 Yrs  
73 30- 39 Yrs  
7 30- 39 Yrs  
82 30- 39 Yrs  
10 30- 39 Yrs  
4 30- 39 Yrs  
4 30- 39 Yrs  
18 30- 39 Yrs  
32 30- 39 Yrs  
13 30- 39 Yrs  
31 30- 39 Yrs  
6 30- 39 Yrs  
4 30- 39 Yrs  
5 30- 39 Yrs  
5 30- 39 Yrs  
55 30- 39 Yrs  
5 30- 39 Yrs  
46 30- 39 Yrs  
18 30- 39 Yrs  
4 30- 39 Yrs  
6 30- 39 Yrs  
9 30- 39 Yrs  
5 30- 39 Yrs  
35 30- 39 Yrs  
5 30- 39 Yrs  
20 30- 39 Yrs  
7 30- 39 Yrs  
7 30- 39 Yrs  
71 30- 39 Yrs  
11 30- 39 Yrs  
6 30- 39 Yrs  
26 30- 39 Yrs  
13 30- 39 Yrs  
24 30- 39 Yrs  
6 30- 39 Yrs  
62 30- 39 Yrs  
48 30- 39 Yrs  
13 30- 39 Yrs  
53 30- 39 Yrs  
17 30- 39 Yrs  
10 30- 39 Yrs  
5 30- 39 Yrs  
8 30- 39 Yrs  
4 30- 39 Yrs  
17 30- 39 Yrs  
4 30- 39 Yrs  
26 30- 39 Yrs  
11 30- 39 Yrs

5 30- 39 Yrs  
102 30- 39 Yrs  
5 30- 39 Yrs  
51 30- 39 Yrs  
4 30- 39 Yrs  
114 30- 39 Yrs  
5 30- 39 Yrs  
9 30- 39 Yrs  
5 30- 39 Yrs  
10 30- 39 Yrs  
8 30- 39 Yrs  
21 30- 39 Yrs  
10 30- 39 Yrs  
22 40- 49 Yrs  
6 40- 49 Yrs  
15 40- 49 Yrs  
4 40- 49 Yrs  
16 40- 49 Yrs  
7 40- 49 Yrs  
20 40- 49 Yrs  
4 40- 49 Yrs  
68 40- 49 Yrs  
45 40- 49 Yrs  
18 40- 49 Yrs  
9 40- 49 Yrs  
102 40- 49 Yrs  
125 40- 49 Yrs  
5 40- 49 Yrs  
5 40- 49 Yrs  
53 40- 49 Yrs  
20 40- 49 Yrs  
16 40- 49 Yrs  
17 40- 49 Yrs  
36 40- 49 Yrs  
6 40- 49 Yrs  
127 40- 49 Yrs  
131 40- 49 Yrs  
8 40- 49 Yrs  
7 40- 49 Yrs  
4 40- 49 Yrs  
10 40- 49 Yrs  
16 40- 49 Yrs  
5 40- 49 Yrs  
6 40- 49 Yrs  
25 40- 49 Yrs  
5 40- 49 Yrs  
4 40- 49 Yrs  
32 40- 49 Yrs  
31 40- 49 Yrs  
7 40- 49 Yrs

5 40- 49 Yrs  
13 40- 49 Yrs  
6 40- 49 Yrs  
6 40- 49 Yrs  
29 40- 49 Yrs  
13 40- 49 Yrs  
27 40- 49 Yrs  
4 40- 49 Yrs  
27 40- 49 Yrs  
16 40- 49 Yrs  
42 40- 49 Yrs  
4 40- 49 Yrs  
4 40- 49 Yrs  
4 40- 49 Yrs  
5 40- 49 Yrs  
13 40- 49 Yrs  
5 40- 49 Yrs  
5 40- 49 Yrs  
24 40- 49 Yrs  
11 40- 49 Yrs  
8 40- 49 Yrs  
24 40- 49 Yrs  
7 40- 49 Yrs  
5 40- 49 Yrs  
5 40- 49 Yrs  
32 40- 49 Yrs  
4 40- 49 Yrs  
31 40- 49 Yrs  
69 40- 49 Yrs  
75 40- 49 Yrs  
4 40- 49 Yrs  
4 40- 49 Yrs  
25 40- 49 Yrs  
6 40- 49 Yrs  
9 40- 49 Yrs  
33 40- 49 Yrs  
47 40- 49 Yrs  
5 40- 49 Yrs  
11 40- 49 Yrs  
5 40- 49 Yrs  
75 40- 49 Yrs  
8 40- 49 Yrs  
18 40- 49 Yrs  
69 40- 49 Yrs  
70 40- 49 Yrs  
40 40- 49 Yrs  
16 40- 49 Yrs  
6 40- 49 Yrs  
21 40- 49 Yrs  
35 40- 49 Yrs

25 40- 49 Yrs  
12 40- 49 Yrs  
5 40- 49 Yrs  
16 40- 49 Yrs  
6 40- 49 Yrs  
7 40- 49 Yrs  
30 40- 49 Yrs  
21 40- 49 Yrs  
4 40- 49 Yrs  
6 40- 49 Yrs  
27 40- 49 Yrs  
36 40- 49 Yrs  
12 40- 49 Yrs  
15 40- 49 Yrs  
32 40- 49 Yrs  
42 40- 49 Yrs  
15 40- 49 Yrs  
8 40- 49 Yrs  
5 40- 49 Yrs  
15 40- 49 Yrs  
9 40- 49 Yrs  
7 40- 49 Yrs  
36 40- 49 Yrs  
9 40- 49 Yrs  
29 40- 49 Yrs  
11 40- 49 Yrs  
14 40- 49 Yrs  
91 40- 49 Yrs  
6 40- 49 Yrs  
4 40- 49 Yrs  
10 40- 49 Yrs  
87 40- 49 Yrs  
35 40- 49 Yrs  
82 40- 49 Yrs  
77 40- 49 Yrs  
20 40- 49 Yrs  
30 40- 49 Yrs  
10 40- 49 Yrs  
17 40- 49 Yrs  
5 40- 49 Yrs  
13 40- 49 Yrs  
17 40- 49 Yrs  
4 40- 49 Yrs  
4 40- 49 Yrs  
7 40- 49 Yrs  
33 40- 49 Yrs  
14 40- 49 Yrs  
9 40- 49 Yrs  
16 40- 49 Yrs  
32 40- 49 Yrs

87 40- 49 Yrs  
9 40- 49 Yrs  
132 40- 49 Yrs  
4 40- 49 Yrs  
6 40- 49 Yrs  
5 40- 49 Yrs  
29 40- 49 Yrs  
20 40- 49 Yrs  
17 40- 49 Yrs  
4 40- 49 Yrs  
34 40- 49 Yrs  
17 40- 49 Yrs  
10 40- 49 Yrs  
6 40- 49 Yrs  
18 70+ Yrs  
11 70+ Yrs  
6 70+ Yrs  
5 70+ Yrs  
8 70+ Yrs  
16 70+ Yrs  
4 70+ Yrs  
11 70+ Yrs  
8 70+ Yrs  
8 70+ Yrs  
5 70+ Yrs  
8 70+ Yrs  
8 70+ Yrs  
5 70+ Yrs  
18 70+ Yrs  
11 70+ Yrs  
42 70+ Yrs  
7 70+ Yrs  
10 70+ Yrs  
6 70+ Yrs  
6 70+ Yrs  
4 70+ Yrs  
14 70+ Yrs  
20 70+ Yrs  
18 70+ Yrs  
15 70+ Yrs  
14 70+ Yrs  
16 70+ Yrs  
17 70+ Yrs  
4 70+ Yrs  
11 70+ Yrs  
12 70+ Yrs  
5 70+ Yrs  
4 70+ Yrs  
4 70+ Yrs  
11 70+ Yrs

23 70+ Yrs  
16 70+ Yrs  
10 70+ Yrs  
25 70+ Yrs  
12 70+ Yrs  
17 70+ Yrs  
5 70+ Yrs  
13 70+ Yrs  
14 70+ Yrs  
7 70+ Yrs  
13 70+ Yrs  
10 70+ Yrs  
7 70+ Yrs  
4 70+ Yrs  
4 70+ Yrs  
10 70+ Yrs  
5 70+ Yrs  
24 70+ Yrs  
8 70+ Yrs  
10 70+ Yrs  
10 70+ Yrs  
4 70+ Yrs  
14 70+ Yrs  
7 70+ Yrs  
8 70+ Yrs  
4 70+ Yrs  
16 70+ Yrs  
19 70+ Yrs  
11 70+ Yrs  
25 70+ Yrs  
4 70+ Yrs  
4 70+ Yrs  
11 70+ Yrs  
4 70+ Yrs  
7 70+ Yrs  
9 70+ Yrs  
22 70+ Yrs  
12 70+ Yrs  
44 70+ Yrs  
4 70+ Yrs  
6 70+ Yrs  
30 70+ Yrs  
6 70+ Yrs  
11 70+ Yrs  
7 70+ Yrs  
13 70+ Yrs  
4 70+ Yrs  
10 70+ Yrs  
7 70+ Yrs  
11 70+ Yrs

13 70+ Yrs  
8 70+ Yrs  
9 70+ Yrs  
11 70+ Yrs  
19 70+ Yrs  
7 70+ Yrs  
20 70+ Yrs  
24 70+ Yrs  
6 70+ Yrs  
7 70+ Yrs  
10 70+ Yrs  
16 70+ Yrs  
9 70+ Yrs  
10 70+ Yrs  
4 70+ Yrs  
9 70+ Yrs  
7 70+ Yrs  
5 70+ Yrs  
13 70+ Yrs  
7 70+ Yrs  
6 70+ Yrs  
6 70+ Yrs  
5 70+ Yrs  
4 70+ Yrs  
5 70+ Yrs  
9 70+ Yrs  
13 70+ Yrs  
37 70+ Yrs  
17 70+ Yrs  
18 70+ Yrs  
10 70+ Yrs  
21 70+ Yrs  
6 70+ Yrs  
36 70+ Yrs  
18 70+ Yrs  
5 70+ Yrs  
30 70+ Yrs  
45 70+ Yrs  
47 70+ Yrs  
4 70+ Yrs  
10 70+ Yrs  
6 70+ Yrs  
9 70+ Yrs  
17 70+ Yrs  
13 70+ Yrs  
7 70+ Yrs  
5 70+ Yrs  
5 70+ Yrs  
6 70+ Yrs  
6 70+ Yrs

12 70+ Yrs  
6 70+ Yrs  
13 70+ Yrs  
8 70+ Yrs  
11 70+ Yrs  
14 70+ Yrs  
40 70+ Yrs  
12 70+ Yrs  
13 70+ Yrs  
5 70+ Yrs  
45 70+ Yrs  
4 70+ Yrs  
12 70+ Yrs  
9 70+ Yrs  
8 70+ Yrs  
5 70+ Yrs  
20 70+ Yrs  
13 70+ Yrs  
18 70+ Yrs  
33 70+ Yrs  
4 50- 59 Yrs  
14 50- 59 Yrs  
15 50- 59 Yrs  
9 50- 59 Yrs  
4 50- 59 Yrs  
4 50- 59 Yrs  
8 50- 59 Yrs  
4 50- 59 Yrs  
14 50- 59 Yrs  
24 50- 59 Yrs  
13 50- 59 Yrs  
12 50- 59 Yrs  
9 50- 59 Yrs  
33 50- 59 Yrs  
42 50- 59 Yrs  
29 50- 59 Yrs  
15 50- 59 Yrs  
36 50- 59 Yrs  
7 50- 59 Yrs  
42 50- 59 Yrs  
6 50- 59 Yrs  
26 50- 59 Yrs  
43 50- 59 Yrs  
37 50- 59 Yrs  
13 50- 59 Yrs  
31 50- 59 Yrs  
9 50- 59 Yrs  
4 50- 59 Yrs  
7 50- 59 Yrs  
171 50- 59 Yrs

74 50- 59 Yrs  
12 50- 59 Yrs  
8 50- 59 Yrs  
9 50- 59 Yrs  
5 50- 59 Yrs  
19 50- 59 Yrs  
21 50- 59 Yrs  
30 50- 59 Yrs  
30 50- 59 Yrs  
22 50- 59 Yrs  
7 50- 59 Yrs  
4 50- 59 Yrs  
13 50- 59 Yrs  
23 50- 59 Yrs  
7 50- 59 Yrs  
12 50- 59 Yrs  
15 50- 59 Yrs  
7 50- 59 Yrs  
9 50- 59 Yrs  
31 50- 59 Yrs  
9 50- 59 Yrs  
25 50- 59 Yrs  
11 50- 59 Yrs  
4 50- 59 Yrs  
11 50- 59 Yrs  
21 50- 59 Yrs  
48 50- 59 Yrs  
22 50- 59 Yrs  
8 50- 59 Yrs  
6 50- 59 Yrs  
9 50- 59 Yrs  
6 50- 59 Yrs  
5 50- 59 Yrs  
13 50- 59 Yrs  
4 50- 59 Yrs  
7 50- 59 Yrs  
26 50- 59 Yrs  
18 50- 59 Yrs  
30 50- 59 Yrs  
10 50- 59 Yrs  
12 50- 59 Yrs  
5 50- 59 Yrs  
7 50- 59 Yrs  
8 50- 59 Yrs  
4 50- 59 Yrs  
26 50- 59 Yrs  
20 50- 59 Yrs  
10 50- 59 Yrs  
9 50- 59 Yrs  
9 50- 59 Yrs

12 50- 59 Yrs  
6 50- 59 Yrs  
4 50- 59 Yrs  
31 50- 59 Yrs  
12 50- 59 Yrs  
5 50- 59 Yrs  
41 50- 59 Yrs  
5 50- 59 Yrs  
8 50- 59 Yrs  
34 50- 59 Yrs  
49 50- 59 Yrs  
10 50- 59 Yrs  
5 50- 59 Yrs  
10 50- 59 Yrs  
7 50- 59 Yrs  
9 50- 59 Yrs  
12 50- 59 Yrs  
12 50- 59 Yrs  
9 50- 59 Yrs  
30 50- 59 Yrs  
43 50- 59 Yrs  
9 50- 59 Yrs  
15 50- 59 Yrs  
25 50- 59 Yrs  
23 50- 59 Yrs  
4 50- 59 Yrs  
18 50- 59 Yrs  
20 50- 59 Yrs  
6 50- 59 Yrs  
11 50- 59 Yrs  
6 50- 59 Yrs  
15 50- 59 Yrs  
19 50- 59 Yrs  
7 50- 59 Yrs  
10 50- 59 Yrs  
20 50- 59 Yrs  
9 50- 59 Yrs  
21 50- 59 Yrs  
22 50- 59 Yrs  
4 50- 59 Yrs  
26 50- 59 Yrs  
5 50- 59 Yrs  
23 50- 59 Yrs  
9 50- 59 Yrs  
20 50- 59 Yrs  
49 50- 59 Yrs  
18 50- 59 Yrs  
16 50- 59 Yrs  
7 50- 59 Yrs  
12 50- 59 Yrs

10 50- 59 Yrs  
6 50- 59 Yrs  
6 50- 59 Yrs  
25 50- 59 Yrs  
33 50- 59 Yrs  
15 50- 59 Yrs  
46 50- 59 Yrs  
29 50- 59 Yrs  
19 50- 59 Yrs  
26 50- 59 Yrs  
51 50- 59 Yrs  
4 50- 59 Yrs  
8 50- 59 Yrs  
10 50- 59 Yrs  
55 50- 59 Yrs  
102 50- 59 Yrs  
63 50- 59 Yrs  
29 50- 59 Yrs  
34 50- 59 Yrs  
17 50- 59 Yrs  
10 50- 59 Yrs  
4 50- 59 Yrs  
7 50- 59 Yrs  
6 50- 59 Yrs  
45 50- 59 Yrs  
17 50- 59 Yrs  
5 50- 59 Yrs  
39 50- 59 Yrs  
19 50- 59 Yrs  
26 50- 59 Yrs  
18 50- 59 Yrs  
4 50- 59 Yrs  
15 50- 59 Yrs  
60 50- 59 Yrs  
10 50- 59 Yrs  
25 50- 59 Yrs  
5 50- 59 Yrs  
29 50- 59 Yrs  
4 50- 59 Yrs  
53 50- 59 Yrs  
22 50- 59 Yrs  
23 50- 59 Yrs  
6 50- 59 Yrs  
27 50- 59 Yrs  
112 50- 59 Yrs  
18 50- 59 Yrs  
14 50- 59 Yrs  
19 50- 59 Yrs  
13 60- 69 Yrs  
15 60- 69 Yrs

9 60- 69 Yrs  
5 60- 69 Yrs  
8 60- 69 Yrs  
9 60- 69 Yrs  
10 60- 69 Yrs  
9 60- 69 Yrs  
10 60- 69 Yrs  
26 60- 69 Yrs  
19 60- 69 Yrs  
6 60- 69 Yrs  
10 60- 69 Yrs  
41 60- 69 Yrs  
30 60- 69 Yrs  
6 60- 69 Yrs  
6 60- 69 Yrs  
21 60- 69 Yrs  
13 60- 69 Yrs  
4 60- 69 Yrs  
21 60- 69 Yrs  
31 60- 69 Yrs  
9 60- 69 Yrs  
37 60- 69 Yrs  
21 60- 69 Yrs  
11 60- 69 Yrs  
18 60- 69 Yrs  
13 60- 69 Yrs  
48 60- 69 Yrs  
11 60- 69 Yrs  
12 60- 69 Yrs  
31 60- 69 Yrs  
47 60- 69 Yrs  
5 60- 69 Yrs  
6 60- 69 Yrs  
11 60- 69 Yrs  
20 60- 69 Yrs  
25 60- 69 Yrs  
20 60- 69 Yrs  
18 60- 69 Yrs  
5 60- 69 Yrs  
4 60- 69 Yrs  
4 60- 69 Yrs  
5 60- 69 Yrs  
16 60- 69 Yrs  
30 60- 69 Yrs  
9 60- 69 Yrs  
8 60- 69 Yrs  
10 60- 69 Yrs  
12 60- 69 Yrs  
20 60- 69 Yrs  
19 60- 69 Yrs

4 60- 69 Yrs  
10 60- 69 Yrs  
6 60- 69 Yrs  
8 60- 69 Yrs  
8 60- 69 Yrs  
15 60- 69 Yrs  
14 60- 69 Yrs  
10 60- 69 Yrs  
31 60- 69 Yrs  
21 60- 69 Yrs  
8 60- 69 Yrs  
6 60- 69 Yrs  
10 60- 69 Yrs  
8 60- 69 Yrs  
6 60- 69 Yrs  
6 60- 69 Yrs  
5 60- 69 Yrs  
10 60- 69 Yrs  
9 60- 69 Yrs  
25 60- 69 Yrs  
29 60- 69 Yrs  
17 60- 69 Yrs  
38 60- 69 Yrs  
4 60- 69 Yrs  
4 60- 69 Yrs  
11 60- 69 Yrs  
13 60- 69 Yrs  
12 60- 69 Yrs  
12 60- 69 Yrs  
18 60- 69 Yrs  
11 60- 69 Yrs  
12 60- 69 Yrs  
6 60- 69 Yrs  
5 60- 69 Yrs  
7 60- 69 Yrs  
11 60- 69 Yrs  
10 60- 69 Yrs  
4 60- 69 Yrs  
8 60- 69 Yrs  
39 60- 69 Yrs  
9 60- 69 Yrs  
29 60- 69 Yrs  
17 60- 69 Yrs  
20 60- 69 Yrs  
5 60- 69 Yrs  
7 60- 69 Yrs  
18 60- 69 Yrs  
8 60- 69 Yrs  
8 60- 69 Yrs  
14 60- 69 Yrs

10 60- 69 Yrs  
12 60- 69 Yrs  
11 60- 69 Yrs  
9 60- 69 Yrs  
29 60- 69 Yrs  
39 60- 69 Yrs  
17 60- 69 Yrs  
19 60- 69 Yrs  
18 60- 69 Yrs  
13 60- 69 Yrs  
22 60- 69 Yrs  
8 60- 69 Yrs  
7 60- 69 Yrs  
11 60- 69 Yrs  
19 60- 69 Yrs  
6 60- 69 Yrs  
7 60- 69 Yrs  
24 60- 69 Yrs  
20 60- 69 Yrs  
8 60- 69 Yrs  
7 60- 69 Yrs  
9 60- 69 Yrs  
12 60- 69 Yrs  
10 60- 69 Yrs  
6 60- 69 Yrs  
12 60- 69 Yrs  
24 60- 69 Yrs  
26 60- 69 Yrs  
6 60- 69 Yrs  
24 60- 69 Yrs  
43 60- 69 Yrs  
23 60- 69 Yrs  
23 60- 69 Yrs  
11 60- 69 Yrs  
21 60- 69 Yrs  
29 60- 69 Yrs  
5 60- 69 Yrs  
7 60- 69 Yrs  
9 60- 69 Yrs  
36 60- 69 Yrs  
12 60- 69 Yrs  
5 60- 69 Yrs  
36 60- 69 Yrs  
48 60- 69 Yrs  
9 60- 69 Yrs  
11 60- 69 Yrs  
5 60- 69 Yrs  
6 60- 69 Yrs  
5 60- 69 Yrs  
26 60- 69 Yrs

14 60- 69 Yrs  
16 60- 69 Yrs  
40 60- 69 Yrs  
7 60- 69 Yrs  
4 60- 69 Yrs  
14 60- 69 Yrs  
17 60- 69 Yrs  
17 60- 69 Yrs  
20 60- 69 Yrs  
19 60- 69 Yrs  
16 60- 69 Yrs  
24 60- 69 Yrs  
5 60- 69 Yrs  
8 60- 69 Yrs  
11 60- 69 Yrs  
31 60- 69 Yrs  
4 60- 69 Yrs  
14 60- 69 Yrs  
6 60- 69 Yrs  
11 60- 69 Yrs  
16 60- 69 Yrs  
4 60- 69 Yrs  
14 60- 69 Yrs  
7 60- 69 Yrs  
14 60- 69 Yrs  
17 60- 69 Yrs  
16 60- 69 Yrs  
8 60- 69 Yrs  
40 60- 69 Yrs  
25 60- 69 Yrs  
6 60- 69 Yrs  
3 40- 49 Yrs  
3 20- 29 Yrs  
3 40- 49 Yrs  
3 < 10 Yrs  
3 40- 49 Yrs  
3 60- 69 Yrs  
3 60- 69 Yrs  
3 60- 69 Yrs  
3 70+ Yrs  
3 30- 39 Yrs  
3 60- 69 Yrs  
3 50- 59 Yrs  
3 40- 49 Yrs  
3 10- 19 Yrs  
3 50- 59 Yrs  
3 40- 49 Yrs  
3 20- 29 Yrs  
3 60- 69 Yrs  
3 30- 39 Yrs

3 50- 59 Yrs  
3 40- 49 Yrs  
3 10- 19 Yrs  
3 70+ Yrs  
3 60- 69 Yrs  
3 40- 49 Yrs  
3 30- 39 Yrs  
3 50- 59 Yrs  
3 60- 69 Yrs  
3 70+ Yrs  
3 70+ Yrs  
3 20- 29 Yrs  
3 60- 69 Yrs  
3 20- 29 Yrs  
3 10- 19 Yrs  
3 70+ Yrs  
3 < 10 Yrs  
3 60- 69 Yrs  
3 40- 49 Yrs  
3 50- 59 Yrs  
3 30- 39 Yrs  
3 < 10 Yrs  
3 40- 49 Yrs  
3 20- 29 Yrs  
3 20- 29 Yrs  
3 30- 39 Yrs  
3 30- 39 Yrs  
3 50- 59 Yrs  
3 70+ Yrs  
3 60- 69 Yrs  
3 20- 29 Yrs  
3 20- 29 Yrs  
3 30- 39 Yrs  
3 40- 49 Yrs  
3 50- 59 Yrs  
3 20- 29 Yrs  
3 40- 49 Yrs  
3 40- 49 Yrs  
3 30- 39 Yrs  
3 20- 29 Yrs  
3 60- 69 Yrs  
3 < 10 Yrs  
3 30- 39 Yrs  
3 30- 39 Yrs  
3 30- 39 Yrs  
3 40- 49 Yrs  
3 30- 39 Yrs  
3 20- 29 Yrs  
3 30- 39 Yrs  
3 20- 29 Yrs

3 40- 49 Yrs  
3 10- 19 Yrs  
3 30- 39 Yrs  
3 70+ Yrs  
3 30- 39 Yrs  
3 20- 29 Yrs  
3 60- 69 Yrs  
3 40- 49 Yrs  
3 60- 69 Yrs  
3 30- 39 Yrs  
3 < 10 Yrs  
3 20- 29 Yrs  
3 20- 29 Yrs  
3 50- 59 Yrs  
3 10- 19 Yrs  
3 60- 69 Yrs  
3 60- 69 Yrs  
3 30- 39 Yrs  
3 20- 29 Yrs  
3 60- 69 Yrs  
3 30- 39 Yrs  
3 70+ Yrs  
3 70+ Yrs  
3 50- 59 Yrs  
3 30- 39 Yrs  
3 40- 49 Yrs  
3 40- 49 Yrs  
3 40- 49 Yrs  
3 < 10 Yrs  
3 70+ Yrs  
3 30- 39 Yrs  
3 30- 39 Yrs  
3 10- 19 Yrs  
3 60- 69 Yrs  
3 40- 49 Yrs  
3 70+ Yrs  
3 60- 69 Yrs  
3 70+ Yrs  
3 50- 59 Yrs  
3 70+ Yrs  
3 50- 59 Yrs  
3 10- 19 Yrs  
3 70+ Yrs  
3 30- 39 Yrs  
3 40- 49 Yrs  
3 < 10 Yrs  
3 20- 29 Yrs  
3 70+ Yrs  
3 30- 39 Yrs  
3 20- 29 Yrs

3 < 10 Yrs  
3 40- 49 Yrs  
3 60- 69 Yrs  
3 70+ Yrs  
3 30- 39 Yrs  
3 70+ Yrs  
3 60- 69 Yrs  
3 70+ Yrs  
3 60- 69 Yrs  
3 20- 29 Yrs  
3 20- 29 Yrs  
3 20- 29 Yrs  
3 10- 19 Yrs  
3 30- 39 Yrs  
3 30- 39 Yrs  
3 60- 69 Yrs  
3 < 10 Yrs  
3 70+ Yrs  
3 20- 29 Yrs  
3 20- 29 Yrs  
3 50- 59 Yrs  
2 20- 29 Yrs  
2 20- 29 Yrs  
2 20- 29 Yrs  
2 10- 19 Yrs  
2 10- 19 Yrs  
2 40- 49 Yrs  
2 < 10 Yrs  
2 50- 59 Yrs  
2 20- 29 Yrs  
2 50- 59 Yrs  
2 70+ Yrs  
2 40- 49 Yrs  
2 40- 49 Yrs  
2 40- 49 Yrs  
2 10- 19 Yrs  
2 20- 29 Yrs  
2 70+ Yrs  
2 < 10 Yrs  
2 20- 29 Yrs  
2 50- 59 Yrs  
2 10- 19 Yrs  
2 20- 29 Yrs  
2 70+ Yrs  
2 20- 29 Yrs  
2 20- 29 Yrs  
2 60- 69 Yrs  
2 50- 59 Yrs  
2 30- 39 Yrs  
2 30- 39 Yrs

2 60- 69 Yrs  
2 60- 69 Yrs  
2 50- 59 Yrs  
2 40- 49 Yrs  
2 < 10 Yrs  
2 40- 49 Yrs  
2 < 10 Yrs  
2 60- 69 Yrs  
2 10- 19 Yrs  
2 40- 49 Yrs  
2 30- 39 Yrs  
2 < 10 Yrs  
2 20- 29 Yrs  
2 60- 69 Yrs  
2 50- 59 Yrs  
2 30- 39 Yrs  
2 30- 39 Yrs  
2 60- 69 Yrs  
2 60- 69 Yrs  
2 50- 59 Yrs  
2 20- 29 Yrs  
2 50- 59 Yrs  
2 20- 29 Yrs  
2 30- 39 Yrs  
2 50- 59 Yrs  
2 50- 59 Yrs  
2 50- 59 Yrs  
2 60- 69 Yrs  
2 60- 69 Yrs  
2 70+ Yrs  
2 < 10 Yrs  
2 70+ Yrs  
2 70+ Yrs  
2 60- 69 Yrs  
2 30- 39 Yrs  
2 40- 49 Yrs  
2 20- 29 Yrs  
2 < 10 Yrs  
2 70+ Yrs  
2 70+ Yrs  
2 50- 59 Yrs  
2 40- 49 Yrs  
2 20- 29 Yrs  
2 30- 39 Yrs  
2 20- 29 Yrs  
2 70+ Yrs  
2 60- 69 Yrs  
2 40- 49 Yrs  
2 70+ Yrs  
2 20- 29 Yrs

2 40- 49 Yrs  
2 60- 69 Yrs  
2 10- 19 Yrs  
2 10- 19 Yrs  
2 30- 39 Yrs  
2 60- 69 Yrs  
2 20- 29 Yrs  
2 70+ Yrs  
2 30- 39 Yrs  
2 20- 29 Yrs  
2 < 10 Yrs  
2 20- 29 Yrs  
2 50- 59 Yrs  
2 40- 49 Yrs  
2 10- 19 Yrs  
2 40- 49 Yrs  
2 70+ Yrs  
2 70+ Yrs  
2 70+ Yrs  
2 30- 39 Yrs  
2 40- 49 Yrs  
2 40- 49 Yrs  
2 40- 49 Yrs  
2 < 10 Yrs  
2 40- 49 Yrs  
2 50- 59 Yrs  
2 60- 69 Yrs  
2 70+ Yrs  
2 20- 29 Yrs  
2 40- 49 Yrs  
2 10- 19 Yrs  
2 70+ Yrs  
2 70+ Yrs  
2 20- 29 Yrs  
2 50- 59 Yrs  
2 70+ Yrs  
2 20- 29 Yrs  
2 70+ Yrs  
2 20- 29 Yrs  
2 20- 29 Yrs  
2 30- 39 Yrs  
2 30- 39 Yrs  
2 10- 19 Yrs  
2 70+ Yrs  
2 30- 39 Yrs  
2 40- 49 Yrs  
2 < 10 Yrs  
2 70+ Yrs  
2 30- 39 Yrs  
2 20- 29 Yrs

2 10- 19 Yrs  
2 30- 39 Yrs  
2 60- 69 Yrs  
2 40- 49 Yrs  
2 60- 69 Yrs  
2 20- 29 Yrs  
2 < 10 Yrs  
2 20- 29 Yrs  
2 30- 39 Yrs  
2 40- 49 Yrs  
2 60- 69 Yrs  
2 50- 59 Yrs  
2 < 10 Yrs  
2 20- 29 Yrs  
2 10- 19 Yrs  
2 30- 39 Yrs  
2 10- 19 Yrs  
2 10- 19 Yrs  
2 20- 29 Yrs  
2 30- 39 Yrs  
2 40- 49 Yrs  
2 30- 39 Yrs  
2 30- 39 Yrs  
2 50- 59 Yrs  
2 10- 19 Yrs  
2 60- 69 Yrs  
2 50- 59 Yrs  
2 40- 49 Yrs  
2 30- 39 Yrs  
2 20- 29 Yrs  
2 < 10 Yrs  
2 60- 69 Yrs  
2 30- 39 Yrs  
2 40- 49 Yrs  
2 30- 39 Yrs  
2 20- 29 Yrs  
2 10- 19 Yrs  
2 10- 19 Yrs  
2 60- 69 Yrs  
2 50- 59 Yrs  
2 40- 49 Yrs  
2 20- 29 Yrs  
2 50- 59 Yrs  
2 70+ Yrs  
2 10- 19 Yrs  
2 70+ Yrs  
2 60- 69 Yrs  
2 10- 19 Yrs  
2 30- 39 Yrs  
2 60- 69 Yrs

2 < 10 Yrs  
2 60- 69 Yrs  
2 20- 29 Yrs  
2 40- 49 Yrs  
2 70+ Yrs  
2 10- 19 Yrs  
2 < 10 Yrs  
2 50- 59 Yrs  
2 70+ Yrs  
2 50- 59 Yrs  
2 20- 29 Yrs  
2 < 10 Yrs  
2 60- 69 Yrs  
2 40- 49 Yrs  
2 < 10 Yrs  
2 10- 19 Yrs  
2 30- 39 Yrs  
2 70+ Yrs  
2 60- 69 Yrs  
2 50- 59 Yrs  
2 30- 39 Yrs  
2 60- 69 Yrs  
2 20- 29 Yrs  
2 40- 49 Yrs  
2 30- 39 Yrs  
2 40- 49 Yrs  
2 40- 49 Yrs  
2 70+ Yrs  
2 60- 69 Yrs  
2 70+ Yrs  
2 60- 69 Yrs  
2 60- 69 Yrs  
2 40- 49 Yrs  
2 40- 49 Yrs  
2 < 10 Yrs  
2 70+ Yrs  
2 70+ Yrs  
2 10- 19 Yrs  
2 10- 19 Yrs  
2 20- 29 Yrs  
2 60- 69 Yrs  
2 70+ Yrs  
2 70+ Yrs  
1 60- 69 Yrs  
1 70+ Yrs  
1 70+ Yrs  
1 60- 69 Yrs  
1 30- 39 Yrs  
1 < 10 Yrs  
1 50- 59 Yrs

1 30- 39 Yrs  
1 30- 39 Yrs  
1 50- 59 Yrs  
1 50- 59 Yrs  
1 40- 49 Yrs  
1 60- 69 Yrs  
1 50- 59 Yrs  
1 40- 49 Yrs  
1 40- 49 Yrs  
1 30- 39 Yrs  
1 70+ Yrs  
1 < 10 Yrs  
1 30- 39 Yrs  
1 20- 29 Yrs  
1 20- 29 Yrs  
1 40- 49 Yrs  
1 60- 69 Yrs  
1 10- 19 Yrs  
1 40- 49 Yrs  
1 10- 19 Yrs  
1 30- 39 Yrs  
1 70+ Yrs  
1 40- 49 Yrs  
1 50- 59 Yrs  
1 50- 59 Yrs  
1 20- 29 Yrs  
1 40- 49 Yrs  
1 60- 69 Yrs  
1 20- 29 Yrs  
1 50- 59 Yrs  
1 40- 49 Yrs  
1 < 10 Yrs  
1 30- 39 Yrs  
1 70+ Yrs  
1 70+ Yrs  
1 < 10 Yrs  
1 20- 29 Yrs  
1 40- 49 Yrs  
1 20- 29 Yrs  
1 40- 49 Yrs  
1 20- 29 Yrs  
1 10- 19 Yrs  
1 70+ Yrs  
1 40- 49 Yrs  
1 30- 39 Yrs  
1 40- 49 Yrs  
1 70+ Yrs  
1 10- 19 Yrs  
1 10- 19 Yrs  
1 30- 39 Yrs

1 10- 19 Yrs  
1 40- 49 Yrs  
1 < 10 Yrs  
1 60- 69 Yrs  
1 40- 49 Yrs  
1 70+ Yrs  
1 50- 59 Yrs  
1 30- 39 Yrs  
1 10- 19 Yrs  
1 20- 29 Yrs  
1 20- 29 Yrs  
1 50- 59 Yrs  
1 60- 69 Yrs  
1 10- 19 Yrs  
1 10- 19 Yrs  
1 10- 19 Yrs  
1 20- 29 Yrs  
1 50- 59 Yrs  
1 10- 19 Yrs  
1 < 10 Yrs  
1 10- 19 Yrs  
1 20- 29 Yrs  
1 20- 29 Yrs  
1 60- 69 Yrs  
1 50- 59 Yrs  
1 40- 49 Yrs  
1 40- 49 Yrs  
1 40- 49 Yrs  
1 50- 59 Yrs  
1 40- 49 Yrs  
1 50- 59 Yrs  
1 40- 49 Yrs  
1 60- 69 Yrs  
1 40- 49 Yrs  
1 40- 49 Yrs  
1 50- 59 Yrs  
1 50- 59 Yrs  
1 70+ Yrs  
1 30- 39 Yrs  
1 10- 19 Yrs  
1 10- 19 Yrs  
1 20- 29 Yrs  
1 40- 49 Yrs  
1 40- 49 Yrs  
1 60- 69 Yrs  
1 50- 59 Yrs  
1 10- 19 Yrs  
1 50- 59 Yrs  
1 10- 19 Yrs  
1 < 10 Yrs  
1 < 10 Yrs

1 30- 39 Yrs  
1 10- 19 Yrs  
1 < 10 Yrs  
1 20- 29 Yrs  
1 < 10 Yrs  
1 70+ Yrs  
1 40- 49 Yrs  
1 30- 39 Yrs  
1 70+ Yrs  
1 10- 19 Yrs  
1 < 10 Yrs  
1 70+ Yrs  
1 < 10 Yrs  
1 50- 59 Yrs  
1 70+ Yrs  
1 60- 69 Yrs  
1 40- 49 Yrs  
1 50- 59 Yrs  
1 20- 29 Yrs  
1 30- 39 Yrs  
1 60- 69 Yrs  
1 20- 29 Yrs  
1 60- 69 Yrs  
1 < 10 Yrs  
1 < 10 Yrs  
1 70+ Yrs  
1 40- 49 Yrs  
1 50- 59 Yrs  
1 50- 59 Yrs  
1 60- 69 Yrs  
1 50- 59 Yrs  
1 40- 49 Yrs  
1 30- 39 Yrs  
1 30- 39 Yrs  
1 < 10 Yrs  
1 40- 49 Yrs  
1 60- 69 Yrs  
1 50- 59 Yrs  
1 10- 19 Yrs  
1 20- 29 Yrs  
1 20- 29 Yrs  
1 50- 59 Yrs  
1 60- 69 Yrs  
1 < 10 Yrs  
1 20- 29 Yrs  
1 20- 29 Yrs  
1 10- 19 Yrs  
1 30- 39 Yrs  
1 40- 49 Yrs  
1 50- 59 Yrs

1 40- 49 Yrs  
1 40- 49 Yrs  
1 20- 29 Yrs  
1 40- 49 Yrs  
1 60- 69 Yrs  
1 30- 39 Yrs  
1 60- 69 Yrs  
1 50- 59 Yrs  
1 < 10 Yrs  
1 30- 39 Yrs  
1 50- 59 Yrs  
1 20- 29 Yrs  
1 20- 29 Yrs  
1 10- 19 Yrs  
1 70+ Yrs  
1 40- 49 Yrs  
1 30- 39 Yrs  
1 40- 49 Yrs  
1 40- 49 Yrs  
1 40- 49 Yrs  
1 40- 49 Yrs  
1 50- 59 Yrs  
1 60- 69 Yrs  
1 50- 59 Yrs  
1 20- 29 Yrs  
1 50- 59 Yrs  
1 60- 69 Yrs  
1 60- 69 Yrs  
1 10- 19 Yrs  
1 20- 29 Yrs  
1 40- 49 Yrs  
1 20- 29 Yrs  
1 < 10 Yrs  
1 < 10 Yrs  
1 70+ Yrs  
1 10- 19 Yrs  
1 70+ Yrs  
1 60- 69 Yrs  
1 10- 19 Yrs  
1 70+ Yrs  
1 50- 59 Yrs  
1 < 10 Yrs  
1 < 10 Yrs  
1 60- 69 Yrs  
1 60- 69 Yrs  
1 10- 19 Yrs  
1 30- 39 Yrs  
1 50- 59 Yrs  
1 10- 19 Yrs  
1 30- 39 Yrs

1 40- 49 Yrs  
1 30- 39 Yrs  
1 20- 29 Yrs  
1 10- 19 Yrs  
1 60- 69 Yrs  
1 20- 29 Yrs  
1 < 10 Yrs  
1 40- 49 Yrs  
1 40- 49 Yrs  
1 50- 59 Yrs  
1 70+ Yrs  
1 < 10 Yrs  
1 50- 59 Yrs  
1 60- 69 Yrs  
1 10- 19 Yrs  
1 < 10 Yrs  
1 70+ Yrs  
1 30- 39 Yrs  
1 70+ Yrs  
1 < 10 Yrs  
1 10- 19 Yrs  
1 40- 49 Yrs  
1 30- 39 Yrs  
1 70+ Yrs  
1 50- 59 Yrs  
1 70+ Yrs  
1 40- 49 Yrs  
1 50- 59 Yrs  
1 50- 59 Yrs  
1 60- 69 Yrs  
1 50- 59 Yrs  
1 40- 49 Yrs  
1 30- 39 Yrs  
1 60- 69 Yrs  
1 20- 29 Yrs  
1 10- 19 Yrs  
1 40- 49 Yrs  
1 60- 69 Yrs  
1 40- 49 Yrs  
1 10- 19 Yrs  
1 20- 29 Yrs  
1 20- 29 Yrs  
1 40- 49 Yrs  
1 70+ Yrs  
1 10- 19 Yrs  
1 20- 29 Yrs  
1 30- 39 Yrs  
1 10- 19 Yrs  
1 10- 19 Yrs  
1 30- 39 Yrs

1 10- 19 Yrs  
1 20- 29 Yrs  
1 70+ Yrs  
1 70+ Yrs  
1 40- 49 Yrs  
1 50- 59 Yrs  
1 50- 59 Yrs  
1 30- 39 Yrs  
1 30- 39 Yrs  
1 30- 39 Yrs  
1 < 10 Yrs  
1 40- 49 Yrs  
1 70+ Yrs  
1 < 10 Yrs  
1 < 10 Yrs  
1 60- 69 Yrs  
1 40- 49 Yrs  
1 70+ Yrs  
1 50- 59 Yrs
